# Supplementary material for: Insights into Sexual Precocity of Female Oriental River Prawn Macrobrachium nipponense through Transcriptome Analysis
Source: PLoS One. 2016 Jun 9;11(6):e0157173. doi: 10.1371/journal.pone.0157173 (PMC4900531; doi:10.1371/journal.pone.0157173)
Supplement: S2 Table — (XLS) [file pone.0157173.s002.xls]

total seqs number with gos: 5195
term_type	term	number	percent	GO
molecular_function	electron carrier activity	32	0.006159769	GO:0009055
molecular_function	protein binding transcription factor activity	11	0.002117421	GO:0000988
molecular_function	binding	2536	0.488161694	GO:0005488
molecular_function	transporter activity	284	0.05466795	GO:0005215
molecular_function	protein tag	1	0.000192493	GO:0031386
molecular_function	catalytic activity	2585	0.49759384	GO:0003824
molecular_function	guanyl-nucleotide exchange factor activity	23	0.004427334	GO:0005085
molecular_function	enzyme regulator activity	73	0.014051973	GO:0030234
molecular_function	molecular transducer activity	160	0.030798845	GO:0060089
molecular_function	structural molecule activity	157	0.030221367	GO:0005198
molecular_function	nucleic acid binding transcription factor activity	103	0.019826756	GO:0001071
molecular_function	receptor activity	116	0.022329163	GO:0004872
molecular_function	antioxidant activity	24	0.004619827	GO:0016209
cellular_component	extracellular matrix	19	0.003657363	GO:0031012
cellular_component	extracellular region part	52	0.010009625	GO:0044421
cellular_component	collagen trimer	3	0.000577478	GO:0005581
cellular_component	membrane part	502	0.096631376	GO:0044425
cellular_component	cell junction	32	0.006159769	GO:0030054
cellular_component	nucleoid	1	0.000192493	GO:0009295
cellular_component	cell	1517	0.29201155	GO:0005623
cellular_component	synapse part	17	0.003272377	GO:0044456
cellular_component	symplast	2	0.000384986	GO:0055044
cellular_component	virion part	14	0.002694899	GO:0044423
cellular_component	organelle	1001	0.192685274	GO:0043226
cellular_component	cell part	1516	0.291819057	GO:0044464
cellular_component	virion	14	0.002694899	GO:0019012
cellular_component	membrane-enclosed lumen	117	0.022521655	GO:0031974
cellular_component	synapse	26	0.005004812	GO:0045202
cellular_component	extracellular region	122	0.023484119	GO:0005576
cellular_component	extracellular matrix part	3	0.000577478	GO:0044420
cellular_component	membrane	889	0.171126083	GO:0016020
cellular_component	macromolecular complex	734	0.141289702	GO:0032991
cellular_component	organelle part	465	0.089509143	GO:0044422
biological_process	reproduction	49	0.009432146	GO:0000003
biological_process	multi-organism process	54	0.01039461	GO:0051704
biological_process	developmental process	239	0.046005775	GO:0032502
biological_process	positive regulation of biological process	84	0.016169394	GO:0048518
biological_process	multicellular organismal process	260	0.050048123	GO:0032501
biological_process	cellular process	2710	0.521655438	GO:0009987
biological_process	hormone secretion	2	0.000384986	GO:0046879
biological_process	single-organism process	2208	0.425024062	GO:0044699
biological_process	growth	33	0.006352262	GO:0040007
biological_process	signaling	506	0.097401347	GO:0023052
biological_process	negative regulation of biological process	106	0.020404235	GO:0048519
biological_process	metabolic process	2780	0.535129933	GO:0008152
biological_process	biological regulation	989	0.190375361	GO:0065007
biological_process	immune system process	39	0.007507218	GO:0002376
biological_process	reproductive process	40	0.007699711	GO:0022414
biological_process	regulation of biological process	936	0.180173244	GO:0050789
biological_process	establishment of localization	621	0.119538017	GO:0051234
biological_process	cellular component organization or biogenesis	398	0.076612127	GO:0071840
biological_process	biological phase	2	0.000384986	GO:0044848
biological_process	rhythmic process	3	0.000577478	GO:0048511
biological_process	response to stimulus	688	0.132435034	GO:0050896
biological_process	biological adhesion	48	0.009239654	GO:0022610
biological_process	locomotion	46	0.008854668	GO:0040011
biological_process	localization	662	0.127430221	GO:0051179
total seqs number with gos: 5195
term_type	term	number	percent	GO
molecular_function	structural constituent of ribosome	83	0.015976901	GO:0003735
molecular_function	cytochrome-c oxidase activity	11	0.002117421	GO:0004129
molecular_function	transferase activity	851	0.163811357	GO:0016740
molecular_function	small protein activating enzyme activity	3	0.000577478	GO:0008641
molecular_function	lipid binding	21	0.004042348	GO:0008289
molecular_function	peptidase regulator activity	12	0.002309913	GO:0061134
molecular_function	odorant binding	1	0.000192493	GO:0005549
molecular_function	amide binding	2	0.000384986	GO:0033218
molecular_function	chromatin binding	16	0.003079885	GO:0003682
molecular_function	cysteine-type endopeptidase regulator activity involved in apoptotic process	1	0.000192493	GO:0043028
molecular_function	thioredoxin-disulfide reductase activity	1	0.000192493	GO:0004791
molecular_function	enzyme activator activity	35	0.006737247	GO:0008047
molecular_function	ribonucleoprotein complex binding	6	0.001154957	GO:0043021
molecular_function	pigment binding	2	0.000384986	GO:0031409
molecular_function	phosphatase regulator activity	5	0.000962464	GO:0019208
molecular_function	carbohydrate binding	20	0.003849856	GO:0030246
molecular_function	nucleoside-triphosphatase regulator activity	40	0.007699711	GO:0060589
molecular_function	lyase activity	87	0.016746872	GO:0016829
molecular_function	vitamin transporter activity	1	0.000192493	GO:0051183
molecular_function	organic cyclic compound binding	1525	0.293551492	GO:0097159
molecular_function	radical SAM enzyme activity	1	0.000192493	GO:0070283
molecular_function	oxygen binding	2	0.000384986	GO:0019825
molecular_function	cofactor binding	111	0.021366699	GO:0048037
molecular_function	oxidoreductase activity	384	0.073917228	GO:0016491
molecular_function	transmembrane transporter activity	229	0.044080847	GO:0022857
molecular_function	neurotransmitter transporter activity	5	0.000962464	GO:0005326
molecular_function	signaling receptor activity	101	0.019441771	GO:0038023
molecular_function	drug binding	1	0.000192493	GO:0008144
molecular_function	hydrolase activity	1037	0.199615014	GO:0016787
molecular_function	deaminase activity	5	0.000962464	GO:0019239
molecular_function	recombinase activity	1	0.000192493	GO:0000150
molecular_function	sulfur compound binding	6	0.001154957	GO:1901681
molecular_function	small molecule binding	961	0.184985563	GO:0036094
molecular_function	selenium binding	2	0.000384986	GO:0008430
molecular_function	protein-lipid complex binding	1	0.000192493	GO:0071814
molecular_function	substrate-specific transporter activity	211	0.040615977	GO:0022892
molecular_function	DNA polymerase processivity factor activity	1	0.000192493	GO:0030337
molecular_function	structural constituent of cytoskeleton	42	0.008084697	GO:0005200
molecular_function	GTP cyclohydrolase I regulator activity	1	0.000192493	GO:0060308
molecular_function	carbohydrate transporter activity	7	0.001347449	GO:1901476
molecular_function	peroxiredoxin activity	5	0.000962464	GO:0051920
molecular_function	pattern binding	1	0.000192493	GO:0001871
molecular_function	Ras guanyl-nucleotide exchange factor activity	10	0.001924928	GO:0005088
molecular_function	enzyme inhibitor activity	14	0.002694899	GO:0004857
molecular_function	cargo receptor activity	3	0.000577478	GO:0038024
molecular_function	isomerase activity	54	0.01039461	GO:0016853
molecular_function	core RNA polymerase binding transcription factor activity	1	0.000192493	GO:0000990
molecular_function	peroxidase activity	18	0.00346487	GO:0004601
molecular_function	metal cluster binding	32	0.006159769	GO:0051540
molecular_function	signal transducer activity	160	0.030798845	GO:0004871
molecular_function	ligase activity	110	0.021174206	GO:0016874
molecular_function	extracellular matrix structural constituent	5	0.000962464	GO:0005201
molecular_function	structural constituent of muscle	1	0.000192493	GO:0008307
molecular_function	superoxide dismutase activity	3	0.000577478	GO:0004784
molecular_function	carbohydrate derivative transporter activity	3	0.000577478	GO:1901505
molecular_function	ion binding	1407	0.270837344	GO:0043167
molecular_function	molybdopterin synthase activity	1	0.000192493	GO:0030366
molecular_function	structural constituent of cuticle	11	0.002117421	GO:0042302
molecular_function	transcription factor binding transcription factor activity	10	0.001924928	GO:0000989
molecular_function	structural constituent of cell wall	2	0.000384986	GO:0005199
molecular_function	kinase regulator activity	11	0.002117421	GO:0019207
molecular_function	ARF guanyl-nucleotide exchange factor activity	4	0.000769971	GO:0005086
molecular_function	heterocyclic compound binding	1524	0.293358999	GO:1901363
molecular_function	sequence-specific DNA binding transcription factor activity	103	0.019826756	GO:0003700
molecular_function	binding, bridging	3	0.000577478	GO:0060090
molecular_function	protein binding	311	0.059865255	GO:0005515
molecular_function	cyclase activity	7	0.001347449	GO:0009975
molecular_function	carbohydrate derivative binding	705	0.135707411	GO:0097367
cellular_component	transmembrane transporter complex	32	0.006159769	GO:1902495
cellular_component	membrane region	24	0.004619827	GO:0098589
cellular_component	extracellular region part	52	0.010009625	GO:0044421
cellular_component	basement membrane collagen trimer	1	0.000192493	GO:0098651
cellular_component	pore complex	2	0.000384986	GO:0046930
cellular_component	intercellular bridge	1	0.000192493	GO:0045171
cellular_component	insulin-like growth factor binding protein complex	1	0.000192493	GO:0016942
cellular_component	proton-transporting two-sector ATPase complex, catalytic domain	11	0.002117421	GO:0033178
cellular_component	basement membrane	3	0.000577478	GO:0005604
cellular_component	protein serine/threonine phosphatase complex	7	0.001347449	GO:0008287
cellular_component	envelope	59	0.011357074	GO:0031975
cellular_component	intrinsic component of membrane	407	0.078344562	GO:0031224
cellular_component	proton-transporting two-sector ATPase complex, proton-transporting domain	14	0.002694899	GO:0033177
cellular_component	protein-lipid complex	2	0.000384986	GO:0032994
cellular_component	anchoring junction	6	0.001154957	GO:0070161
cellular_component	virion part	14	0.002694899	GO:0044423
cellular_component	ribonucleoprotein complex	196	0.037728585	GO:0030529
cellular_component	integral component of synaptic vesicle membrane	1	0.000192493	GO:0030285
cellular_component	organelle membrane	101	0.019441771	GO:0031090
cellular_component	viral nucleocapsid	14	0.002694899	GO:0019013
cellular_component	plasmodesma	2	0.000384986	GO:0009506
cellular_component	mitochondrial membrane part	18	0.00346487	GO:0044455
cellular_component	organelle part	465	0.089509143	GO:0044422
cellular_component	cell projection part	6	0.001154957	GO:0044463
cellular_component	synaptic vesicle	7	0.001347449	GO:0008021
cellular_component	intracellular part	1293	0.248893167	GO:0044424
cellular_component	terminal bouton	1	0.000192493	GO:0043195
cellular_component	apical part of cell	8	0.001539942	GO:0045177
cellular_component	non-membrane-bounded organelle	476	0.091626564	GO:0043228
cellular_component	sperm part	1	0.000192493	GO:0097223
cellular_component	integral component of organelle membrane	11	0.002117421	GO:0031301
cellular_component	ATPase dependent transmembrane transport complex	4	0.000769971	GO:0098533
cellular_component	mitochondrial nucleoid	1	0.000192493	GO:0042645
cellular_component	aspartate carbamoyltransferase complex	2	0.000384986	GO:0009347
cellular_component	organellar ribosome	4	0.000769971	GO:0000313
cellular_component	coated membrane	19	0.003657363	GO:0048475
cellular_component	organelle envelope lumen	4	0.000769971	GO:0031970
cellular_component	synapse part	17	0.003272377	GO:0044456
cellular_component	oligosaccharyltransferase complex	4	0.000769971	GO:0008250
cellular_component	basal part of cell	1	0.000192493	GO:0045178
cellular_component	endomembrane system	105	0.020211742	GO:0012505
cellular_component	cell leading edge	4	0.000769971	GO:0031252
cellular_component	ciliary part	4	0.000769971	GO:0044441
cellular_component	apical plasma membrane	5	0.000962464	GO:0016324
cellular_component	cell-substrate junction	3	0.000577478	GO:0030055
cellular_component	presynaptic active zone	2	0.000384986	GO:0048786
cellular_component	cell part	1516	0.291819057	GO:0044464
cellular_component	neuron part	20	0.003849856	GO:0097458
cellular_component	neuromuscular junction	3	0.000577478	GO:0031594
cellular_component	coated pit	4	0.000769971	GO:0005905
cellular_component	other organism part	1	0.000192493	GO:0044217
cellular_component	NADH dehydrogenase complex	3	0.000577478	GO:0030964
cellular_component	cell division site	1	0.000192493	GO:0032153
cellular_component	basal plasma membrane	1	0.000192493	GO:0009925
cellular_component	AP-type membrane coat adaptor complex	7	0.001347449	GO:0030119
cellular_component	apicolateral plasma membrane	2	0.000384986	GO:0016327
cellular_component	cell division site part	1	0.000192493	GO:0032155
cellular_component	protein-DNA complex	17	0.003272377	GO:0032993
cellular_component	viral capsid	14	0.002694899	GO:0019028
cellular_component	bursicon neuropeptide hormone complex	1	0.000192493	GO:0031395
cellular_component	organelle lumen	114	0.021944177	GO:0043233
cellular_component	intracellular organelle	982	0.189027911	GO:0043229
cellular_component	plasma membrane part	64	0.012319538	GO:0044459
cellular_component	plasma membrane region	9	0.001732435	GO:0098590
cellular_component	membrane-bounded organelle	644	0.123965351	GO:0043227
cellular_component	cell body	6	0.001154957	GO:0044297
cellular_component	extrinsic component of membrane	14	0.002694899	GO:0019898
cellular_component	network-forming collagen trimer	1	0.000192493	GO:0098642
cellular_component	ER membrane protein complex	1	0.000192493	GO:0072546
cellular_component	translocon complex	1	0.000192493	GO:0071256
cellular_component	midbody	6	0.001154957	GO:0030496
cellular_component	respiratory chain	21	0.004042348	GO:0070469
cellular_component	synaptic vesicle membrane	1	0.000192493	GO:0030672
cellular_component	proteinaceous extracellular matrix	14	0.002694899	GO:0005578
cellular_component	plasma membrane	116	0.022329163	GO:0005886
cellular_component	respiratory chain complex III	1	0.000192493	GO:0045275
cellular_component	endoplasmic reticulum membrane	14	0.002694899	GO:0005789
cellular_component	collagen type IV trimer	1	0.000192493	GO:0005587
cellular_component	contractile fiber part	6	0.001154957	GO:0044449
cellular_component	intracellular	1406	0.270644851	GO:0005622
cellular_component	external encapsulating structure	6	0.001154957	GO:0030312
cellular_component	plasma lipoprotein particle	2	0.000384986	GO:0034358
cellular_component	ion channel complex	27	0.005197305	GO:0034702
cellular_component	sperm individualization complex	1	0.000192493	GO:0070864
cellular_component	intrinsic component of synaptic vesicle membrane	1	0.000192493	GO:0098563
cellular_component	Nem1-Spo7 phosphatase complex	1	0.000192493	GO:0071595
cellular_component	membrane raft	2	0.000384986	GO:0045121
cellular_component	basolateral plasma membrane	3	0.000577478	GO:0016323
cellular_component	extraorganismal space	1	0.000192493	GO:0043245
cellular_component	nuclear outer membrane-endoplasmic reticulum membrane network	15	0.002887392	GO:0042175
cellular_component	GPI-anchor transamidase complex	1	0.000192493	GO:0042765
cellular_component	membrane part	502	0.096631376	GO:0044425
cellular_component	cell periphery	126	0.02425409	GO:0071944
cellular_component	alpha-1,6-mannosyltransferase complex	3	0.000577478	GO:0000136
cellular_component	molybdopterin synthase complex	2	0.000384986	GO:0019008
cellular_component	vesicle	42	0.008084697	GO:0031982
cellular_component	extracellular space	18	0.00346487	GO:0005615
cellular_component	extracellular organelle	19	0.003657363	GO:0043230
cellular_component	intrinsic component of organelle membrane	11	0.002117421	GO:0031300
cellular_component	cell projection	37	0.007122233	GO:0042995
cellular_component	oxidoreductase complex	21	0.004042348	GO:1990204
cellular_component	membrane coat	19	0.003657363	GO:0030117
cellular_component	outer membrane	6	0.001154957	GO:0019867
cellular_component	postsynaptic density	1	0.000192493	GO:0014069
cellular_component	proton-transporting two-sector ATPase complex	26	0.005004812	GO:0016469
cellular_component	retromer complex	2	0.000384986	GO:0030904
cellular_component	protein complex	550	0.10587103	GO:0043234
cellular_component	respiratory chain complex IV	11	0.002117421	GO:0045277
cellular_component	stereocilium	1	0.000192493	GO:0032420
cellular_component	cell-cell junction	18	0.00346487	GO:0005911
cellular_component	synaptic membrane	7	0.001347449	GO:0097060
cellular_component	sublamina densa	1	0.000192493	GO:0061618
cellular_component	intracellular organelle part	460	0.088546679	GO:0044446
cellular_component	cell surface furrow	1	0.000192493	GO:0097610
cellular_component	extracellular matrix part	3	0.000577478	GO:0044420
cellular_component	cell surface	4	0.000769971	GO:0009986
cellular_component	integral component of membrane	406	0.078152069	GO:0016021
cellular_component	cell pole	1	0.000192493	GO:0060187
biological_process	taxis	22	0.004234841	GO:0042330
biological_process	negative regulation of developmental process	15	0.002887392	GO:0051093
biological_process	positive regulation of cellular process	75	0.014436959	GO:0048522
biological_process	immune effector process	7	0.001347449	GO:0002252
biological_process	positive regulation of cellular component organization	7	0.001347449	GO:0051130
biological_process	single organism reproductive process	37	0.007122233	GO:0044702
biological_process	response to other organism	9	0.001732435	GO:0051707
biological_process	regulation of cellular component organization	52	0.010009625	GO:0051128
biological_process	regulation of locomotion	10	0.001924928	GO:0040012
biological_process	response to abiotic stimulus	33	0.006352262	GO:0009628
biological_process	multi-organism reproductive process	37	0.007122233	GO:0044703
biological_process	immune system development	18	0.00346487	GO:0002520
biological_process	leukocyte activation	7	0.001347449	GO:0045321
biological_process	regulation of multicellular organismal process	46	0.008854668	GO:0051239
biological_process	negative regulation of cellular component organization	16	0.003079885	GO:0051129
biological_process	intercellular transport	2	0.000384986	GO:0010496
biological_process	regulation of biological quality	121	0.023291627	GO:0065008
biological_process	multi-organism behavior	4	0.000769971	GO:0051705
biological_process	biosynthetic process	758	0.145909528	GO:0009058
biological_process	synaptic transmission	28	0.005389798	GO:0007268
biological_process	positive regulation of growth	5	0.000962464	GO:0045927
biological_process	regulation of cellular component biogenesis	18	0.00346487	GO:0044087
biological_process	single-organism developmental process	235	0.045235804	GO:0044767
biological_process	negative regulation of transport	6	0.001154957	GO:0051051
biological_process	positive regulation of response to stimulus	17	0.003272377	GO:0048584
biological_process	negative regulation of homeostatic process	1	0.000192493	GO:0032845
biological_process	multi-organism transport	1	0.000192493	GO:0044766
biological_process	regulation of molecular function	137	0.026371511	GO:0065009
biological_process	response to biotic stimulus	10	0.001924928	GO:0009607
biological_process	cell growth	15	0.002887392	GO:0016049
biological_process	response to chemical	100	0.019249278	GO:0042221
biological_process	cell proliferation	25	0.00481232	GO:0008283
biological_process	flight	1	0.000192493	GO:0060361
biological_process	cell adhesion	46	0.008854668	GO:0007155
biological_process	negative regulation of multicellular organismal process	3	0.000577478	GO:0051241
biological_process	developmental process involved in reproduction	27	0.005197305	GO:0003006
biological_process	immune response	16	0.003079885	GO:0006955
biological_process	cellular component biogenesis	247	0.047545717	GO:0044085
biological_process	single-organism behavior	11	0.002117421	GO:0044708
biological_process	positive regulation of biological process	84	0.016169394	GO:0048518
biological_process	positive regulation of metabolic process	44	0.008469682	GO:0009893
biological_process	response to external stimulus	45	0.008662175	GO:0009605
biological_process	regulation of immune system process	14	0.002694899	GO:0002682
biological_process	positive regulation of multicellular organismal process	5	0.000962464	GO:0051240
biological_process	interspecies interaction between organisms	9	0.001732435	GO:0044419
biological_process	regulation of cellular process	883	0.169971126	GO:0050794
biological_process	organ growth	1	0.000192493	GO:0035265
biological_process	cytolysis	1	0.000192493	GO:0019835
biological_process	single-organism transport	407	0.078344562	GO:0044765
biological_process	regulation of homeostatic process	4	0.000769971	GO:0032844
biological_process	macromolecule localization	135	0.025986526	GO:0033036
biological_process	multi-organism cellular process	9	0.001732435	GO:0044764
biological_process	antigen processing and presentation	2	0.000384986	GO:0019882
biological_process	positive regulation of cellular component biogenesis	1	0.000192493	GO:0044089
biological_process	cellular component organization	293	0.056400385	GO:0016043
biological_process	regulation of signaling	117	0.022521655	GO:0023051
biological_process	establishment of protein localization	106	0.020404235	GO:0045184
biological_process	somatic diversification of immune receptors	3	0.000577478	GO:0002200
biological_process	single-organism membrane organization	11	0.002117421	GO:0044802
biological_process	single-organism localization	16	0.003079885	GO:1902578
biological_process	cellular metabolic process	1985	0.382098171	GO:0044237
biological_process	localization of cell	22	0.004234841	GO:0051674
biological_process	filamentous growth	1	0.000192493	GO:0030447
biological_process	negative regulation of multi-organism process	2	0.000384986	GO:0043901
biological_process	cell motility	22	0.004234841	GO:0048870
biological_process	hemocyte proliferation	1	0.000192493	GO:0035172
biological_process	methylation	64	0.012319538	GO:0032259
biological_process	primary metabolic process	2066	0.397690087	GO:0044238
biological_process	catabolic process	461	0.088739172	GO:0009056
biological_process	death	41	0.007892204	GO:0016265
biological_process	establishment of localization	621	0.119538017	GO:0051234
biological_process	reproductive behavior	3	0.000577478	GO:0019098
biological_process	movement in environment of other organism involved in symbiotic interaction	1	0.000192493	GO:0052192
biological_process	cellular response to stimulus	562	0.108180943	GO:0051716
biological_process	hair cycle phase	1	0.000192493	GO:0044851
biological_process	establishment of localization in cell	92	0.017709336	GO:0051649
biological_process	intraspecies interaction between organisms	1	0.000192493	GO:0051703
biological_process	myeloid cell homeostasis	3	0.000577478	GO:0002262
biological_process	regulation of localization	41	0.007892204	GO:0032879
biological_process	organic substance metabolic process	2128	0.409624639	GO:0071704
biological_process	response to endogenous stimulus	40	0.007699711	GO:0009719
biological_process	hormone metabolic process	5	0.000962464	GO:0042445
biological_process	anatomical structure development	192	0.036958614	GO:0048856
biological_process	regulation of hormone secretion	2	0.000384986	GO:0046883
biological_process	negative regulation of biological process	106	0.020404235	GO:0048519
biological_process	positive regulation of signaling	15	0.002887392	GO:0023056
biological_process	regulation of growth	15	0.002887392	GO:0040008
biological_process	cell cycle phase	1	0.000192493	GO:0022403
biological_process	negative regulation of immune system process	1	0.000192493	GO:0002683
biological_process	carbon utilization	25	0.00481232	GO:0015976
biological_process	regulation of multi-organism process	8	0.001539942	GO:0043900
biological_process	pathogenesis	2	0.000384986	GO:0009405
biological_process	negative regulation of growth	4	0.000769971	GO:0045926
biological_process	multicellular organism growth	4	0.000769971	GO:0035264
biological_process	anatomical structure morphogenesis	91	0.017516843	GO:0009653
biological_process	transport	615	0.118383061	GO:0006810
biological_process	single organism cell adhesion	8	0.001539942	GO:0098602
biological_process	positive regulation of locomotion	2	0.000384986	GO:0040017
biological_process	single-multicellular organism process	245	0.047160731	GO:0044707
biological_process	activation of immune response	4	0.000769971	GO:0002253
biological_process	pigmentation	6	0.001154957	GO:0043473
biological_process	single-organism metabolic process	1235	0.237728585	GO:0044710
biological_process	multi-multicellular organism process	3	0.000577478	GO:0044706
biological_process	regulation of metabolic process	419	0.080654475	GO:0019222
biological_process	negative regulation of reproductive process	1	0.000192493	GO:2000242
biological_process	positive regulation of developmental process	9	0.001732435	GO:0051094
biological_process	ovulation cycle	1	0.000192493	GO:0042698
biological_process	regulation of reproductive process	3	0.000577478	GO:2000241
biological_process	positive regulation of transport	4	0.000769971	GO:0051050
biological_process	production of molecular mediator of immune response	4	0.000769971	GO:0002440
biological_process	response to stress	168	0.032338787	GO:0006950
biological_process	single-organism cellular process	1814	0.349181906	GO:0044763
biological_process	meiotic cell cycle	13	0.002502406	GO:0051321
biological_process	establishment of RNA localization	3	0.000577478	GO:0051236
biological_process	leukocyte migration	3	0.000577478	GO:0050900
biological_process	multicellular organism reproduction	35	0.006737247	GO:0032504
biological_process	anatomical structure formation involved in morphogenesis	31	0.005967276	GO:0048646
biological_process	nitrogen compound metabolic process	1335	0.256977863	GO:0006807
biological_process	detection of stimulus	10	0.001924928	GO:0051606
biological_process	organelle organization	173	0.033301251	GO:0006996
biological_process	negative regulation of cellular process	96	0.018479307	GO:0048523
biological_process	positive regulation of lipid storage	1	0.000192493	GO:0010884
biological_process	multicellular organismal reproductive process	34	0.006544755	GO:0048609
biological_process	negative regulation of signaling	18	0.00346487	GO:0023057
biological_process	negative regulation of sequestering of calcium ion	2	0.000384986	GO:0051283
biological_process	positive regulation of hormone secretion	1	0.000192493	GO:0046887
biological_process	regulation of biological process	936	0.180173244	GO:0050789
biological_process	regulation of synaptic transmission	1	0.000192493	GO:0050804
biological_process	negative regulation of hormone secretion	1	0.000192493	GO:0046888
biological_process	maintenance of location	9	0.001732435	GO:0051235
biological_process	negative regulation of response to stimulus	19	0.003657363	GO:0048585
biological_process	negative regulation of locomotion	3	0.000577478	GO:0040013
biological_process	positive regulation of multi-organism process	2	0.000384986	GO:0043902
biological_process	negative regulation of metabolic process	41	0.007892204	GO:0009892
biological_process	positive regulation of immune system process	9	0.001732435	GO:0002684
biological_process	establishment of organelle localization	10	0.001924928	GO:0051656
biological_process	sexual reproduction	37	0.007122233	GO:0019953
biological_process	cellular localization	109	0.020981713	GO:0051641
biological_process	circadian rhythm	2	0.000384986	GO:0007623
biological_process	regulation of response to stimulus	117	0.022521655	GO:0048583
biological_process	locomotion involved in locomotory behavior	1	0.000192493	GO:0031987
biological_process	multi-organism metabolic process	4	0.000769971	GO:0044033
biological_process	regulation of circadian rhythm	2	0.000384986	GO:0042752
biological_process	single organism signaling	506	0.097401347	GO:0044700
biological_process	peptide hormone secretion	2	0.000384986	GO:0030072
biological_process	cell wall organization or biogenesis	36	0.00692974	GO:0071554
biological_process	behavior	15	0.002887392	GO:0007610
biological_process	developmental growth	20	0.003849856	GO:0048589
biological_process	regulation of developmental process	41	0.007892204	GO:0050793
biological_process	ovulation cycle process	1	0.000192493	GO:0022602
total seqs number with gos: 5195
term_type	term	number	percent	GO
molecular_function	substrate-specific transmembrane transporter activity	195	0.037536092	GO:0022891
molecular_function	thiamine pyrophosphate binding	2	0.000384986	GO:0030976
molecular_function	cell adhesion molecule binding	10	0.001924928	GO:0050839
molecular_function	sulfur compound transmembrane transporter activity	2	0.000384986	GO:1901682
molecular_function	Wnt-protein binding	1	0.000192493	GO:0017147
molecular_function	peptidase inhibitor activity	12	0.002309913	GO:0030414
molecular_function	carbon-nitrogen lyase activity	1	0.000192493	GO:0016840
molecular_function	cysteine-type endopeptidase inhibitor activity involved in apoptotic process	1	0.000192493	GO:0043027
molecular_function	growth factor binding	1	0.000192493	GO:0019838
molecular_function	ubiquitin-protein transferase activity	25	0.00481232	GO:0004842
molecular_function	oxidoreductase activity, acting on diphenols and related substances as donors	3	0.000577478	GO:0016679
molecular_function	hydrolase activity, acting on acid anhydrides	355	0.068334937	GO:0016817
molecular_function	protein binding, bridging	3	0.000577478	GO:0030674
molecular_function	GTPase regulator activity	39	0.007507218	GO:0030695
molecular_function	enzyme binding	37	0.007122233	GO:0019899
molecular_function	hydrolase activity, acting on acid carbon-carbon bonds	2	0.000384986	GO:0016822
molecular_function	small conjugating protein binding	2	0.000384986	GO:0032182
molecular_function	photoreceptor activity	6	0.001154957	GO:0009881
molecular_function	nucleosome binding	2	0.000384986	GO:0031491
molecular_function	lipid transporter activity	6	0.001154957	GO:0005319
molecular_function	tetrapyrrole binding	37	0.007122233	GO:0046906
molecular_function	carbohydrate transmembrane transporter activity	7	0.001347449	GO:0015144
molecular_function	GTP-dependent protein binding	1	0.000192493	GO:0030742
molecular_function	translation initiation factor binding	3	0.000577478	GO:0031369
molecular_function	beta-catenin binding	3	0.000577478	GO:0008013
molecular_function	deacetylase activity	4	0.000769971	GO:0019213
molecular_function	transferase activity, transferring acyl groups	49	0.009432146	GO:0016746
molecular_function	active transmembrane transporter activity	73	0.014051973	GO:0022804
molecular_function	oxidoreductase activity, acting on a sulfur group of donors	13	0.002502406	GO:0016667
molecular_function	heat shock protein binding	4	0.000769971	GO:0031072
molecular_function	monooxygenase activity	30	0.005774783	GO:0004497
molecular_function	steroid binding	3	0.000577478	GO:0005496
molecular_function	transmembrane signaling receptor activity	66	0.012704524	GO:0004888
molecular_function	oxidoreductase activity, acting on the CH-NH group of donors	11	0.002117421	GO:0016645
molecular_function	monosaccharide binding	2	0.000384986	GO:0048029
molecular_function	ATPase regulator activity	1	0.000192493	GO:0060590
molecular_function	endopeptidase regulator activity	8	0.001539942	GO:0061135
molecular_function	hydrolase activity, acting on ether bonds	2	0.000384986	GO:0016801
molecular_function	hydrolase activity, acting on ester bonds	190	0.036573628	GO:0016788
molecular_function	organic phosphonate transmembrane transporter activity	1	0.000192493	GO:0015604
molecular_function	ligase activity, forming carbon-carbon bonds	3	0.000577478	GO:0016885
molecular_function	molybdopterin cofactor binding	2	0.000384986	GO:0043546
molecular_function	protein C-terminus binding	4	0.000769971	GO:0008022
molecular_function	protein kinase regulator activity	11	0.002117421	GO:0019887
molecular_function	ribosomal large subunit binding	2	0.000384986	GO:0043023
molecular_function	GPI-anchor transamidase activity	1	0.000192493	GO:0003923
molecular_function	unfolded protein binding	30	0.005774783	GO:0051082
molecular_function	chitin binding	32	0.006159769	GO:0008061
molecular_function	oxidoreductase activity, acting on CH or CH2 groups	5	0.000962464	GO:0016725
molecular_function	structural constituent of chitin-based cuticle	1	0.000192493	GO:0005214
molecular_function	protein phosphatase regulator activity	4	0.000769971	GO:0019888
molecular_function	pyridoxal phosphate binding	17	0.003272377	GO:0030170
molecular_function	kinase inhibitor activity	1	0.000192493	GO:0019210
molecular_function	sequence-specific DNA binding RNA polymerase II transcription factor activity	13	0.002502406	GO:0000981
molecular_function	phosphoprotein binding	2	0.000384986	GO:0051219
molecular_function	ferrochelatase activity	1	0.000192493	GO:0004325
molecular_function	transferase activity, transferring phosphorus-containing groups	499	0.096053898	GO:0016772
molecular_function	intramolecular transferase activity	8	0.001539942	GO:0016866
molecular_function	oxidoreductase activity, acting on superoxide radicals as acceptor	3	0.000577478	GO:0016721
molecular_function	transferase activity, transferring one-carbon groups	68	0.013089509	GO:0016741
molecular_function	cis-trans isomerase activity	11	0.002117421	GO:0016859
molecular_function	steroid hormone receptor activity	21	0.004042348	GO:0003707
molecular_function	gamma-catenin binding	1	0.000192493	GO:0045295
molecular_function	palmitoyl hydrolase activity	1	0.000192493	GO:0098599
molecular_function	peptide receptor activity	2	0.000384986	GO:0001653
molecular_function	peptide binding	2	0.000384986	GO:0042277
molecular_function	oxygen transporter activity	2	0.000384986	GO:0005344
molecular_function	Rho guanyl-nucleotide exchange factor activity	10	0.001924928	GO:0005089
molecular_function	transferase activity, transferring sulfur-containing groups	14	0.002694899	GO:0016782
molecular_function	glycosaminoglycan binding	1	0.000192493	GO:0005539
molecular_function	diacylglycerol binding	4	0.000769971	GO:0019992
molecular_function	ion channel binding	3	0.000577478	GO:0044325
molecular_function	oxidoreductase activity, oxidizing metal ions	1	0.000192493	GO:0016722
molecular_function	ribonucleotide binding	668	0.128585178	GO:0032553
molecular_function	oxidoreductase activity, acting on peroxide as acceptor	19	0.003657363	GO:0016684
molecular_function	glycolipid binding	1	0.000192493	GO:0051861
molecular_function	oxidoreductase activity, acting on the CH-CH group of donors	35	0.006737247	GO:0016627
molecular_function	GTPase activator activity	32	0.006159769	GO:0005096
molecular_function	vitamin binding	9	0.001732435	GO:0019842
molecular_function	ligase activity, forming carbon-nitrogen bonds	47	0.009047161	GO:0016879
molecular_function	phosphatase activator activity	3	0.000577478	GO:0019211
molecular_function	peptidase activity	231	0.044465833	GO:0008233
molecular_function	intramolecular oxidoreductase activity	12	0.002309913	GO:0016860
molecular_function	neurotransmitter receptor activity	2	0.000384986	GO:0030594
molecular_function	heme-copper terminal oxidase activity	11	0.002117421	GO:0015002
molecular_function	nucleoside binding	661	0.127237729	GO:0001882
molecular_function	oxidoreductase activity, acting on single donors with incorporation of molecular oxygen	7	0.001347449	GO:0016701
molecular_function	nucleotide-sugar transmembrane transporter activity	1	0.000192493	GO:0005338
molecular_function	folic acid binding	3	0.000577478	GO:0005542
molecular_function	protein self-association	1	0.000192493	GO:0043621
molecular_function	anion binding	745	0.143407122	GO:0043168
molecular_function	adenosine-phosphate deaminase activity	1	0.000192493	GO:0047623
molecular_function	phosphorelay sensor kinase activity	7	0.001347449	GO:0000155
molecular_function	protein domain specific binding	15	0.002887392	GO:0019904
molecular_function	transferase activity, transferring aldehyde or ketonic groups	2	0.000384986	GO:0016744
molecular_function	calmodulin binding	12	0.002309913	GO:0005516
molecular_function	glucosamine-6-phosphate deaminase activity	1	0.000192493	GO:0004342
molecular_function	guanylate cyclase activity	4	0.000769971	GO:0004383
molecular_function	quinone binding	2	0.000384986	GO:0048038
molecular_function	heparin binding	1	0.000192493	GO:0008201
molecular_function	guanine deaminase activity	1	0.000192493	GO:0008892
molecular_function	lipoate synthase activity	1	0.000192493	GO:0016992
molecular_function	protein dimerization activity	61	0.01174206	GO:0046983
molecular_function	vitamin transmembrane transporter activity	1	0.000192493	GO:0090482
molecular_function	ligase activity, forming phosphoric ester bonds	1	0.000192493	GO:0016886
molecular_function	passive transmembrane transporter activity	86	0.016554379	GO:0022803
molecular_function	signaling receptor activity	101	0.019441771	GO:0038023
molecular_function	oxidoreductase activity, acting on paired donors, with incorporation or reduction of molecular oxygen	46	0.008854668	GO:0016705
molecular_function	adenosine deaminase activity	1	0.000192493	GO:0004000
molecular_function	polysaccharide binding	1	0.000192493	GO:0030247
molecular_function	nucleotide binding	945	0.181905679	GO:0000166
molecular_function	nucleoside transmembrane transporter activity	2	0.000384986	GO:0005337
molecular_function	alcohol binding	1	0.000192493	GO:0043178
molecular_function	hydrolase activity, acting on glycosyl bonds	102	0.019634264	GO:0016798
molecular_function	oxidoreductase activity, acting on a heme group of donors	11	0.002117421	GO:0016675
molecular_function	iron-sulfur cluster binding	32	0.006159769	GO:0051536
molecular_function	dynein binding	1	0.000192493	GO:0045502
molecular_function	protein complex binding	33	0.006352262	GO:0032403
molecular_function	fatty-acyl-CoA binding	3	0.000577478	GO:0000062
molecular_function	nucleic acid binding	606	0.116650626	GO:0003676
molecular_function	organic acid binding	10	0.001924928	GO:0043177
molecular_function	ubiquitinyl hydrolase activity	11	0.002117421	GO:0036459
molecular_function	oxidoreductase activity, acting on the CH-NH2 group of donors	3	0.000577478	GO:0016638
molecular_function	ribosome binding	6	0.001154957	GO:0043022
molecular_function	histone binding	4	0.000769971	GO:0042393
molecular_function	transferase activity, transferring nitrogenous groups	14	0.002694899	GO:0016769
molecular_function	L-ascorbic acid transporter activity	1	0.000192493	GO:0015229
molecular_function	ligase activity, forming carbon-sulfur bonds	6	0.001154957	GO:0016877
molecular_function	chromatin DNA binding	1	0.000192493	GO:0031490
molecular_function	SNARE binding	3	0.000577478	GO:0000149
molecular_function	adenylate cyclase activity	3	0.000577478	GO:0004016
molecular_function	purine ribonucleotide transmembrane transporter activity	1	0.000192493	GO:0005346
molecular_function	nucleoside phosphate binding	945	0.181905679	GO:1901265
molecular_function	identical protein binding	17	0.003272377	GO:0042802
molecular_function	transferase activity, transferring selenium-containing groups	1	0.000192493	GO:0016785
molecular_function	receptor binding	15	0.002887392	GO:0005102
molecular_function	serine hydrolase activity	48	0.009239654	GO:0017171
molecular_function	phosphorelay response regulator activity	1	0.000192493	GO:0000156
molecular_function	cation binding	704	0.135514918	GO:0043169
molecular_function	transferase activity, transferring glycosyl groups	60	0.011549567	GO:0016757
molecular_function	glutathione peroxidase activity	2	0.000384986	GO:0004602
molecular_function	phosphorus-oxygen lyase activity	19	0.003657363	GO:0016849
molecular_function	hydrolase activity, acting on acid anhydrides, catalyzing transmembrane movement of substances	49	0.009432146	GO:0016820
molecular_function	catalase activity	1	0.000192493	GO:0004096
molecular_function	iodide peroxidase activity	1	0.000192493	GO:0004447
molecular_function	carbon-carbon lyase activity	30	0.005774783	GO:0016830
molecular_function	receptor signaling protein activity	12	0.002309913	GO:0005057
molecular_function	ligase activity, forming carbon-oxygen bonds	22	0.004234841	GO:0016875
molecular_function	transcription factor binding	11	0.002117421	GO:0008134
molecular_function	carbon-oxygen lyase activity	19	0.003657363	GO:0016835
molecular_function	hydrolase activity, acting on carbon-nitrogen (but not peptide) bonds	28	0.005389798	GO:0016810
molecular_function	thyroid hormone receptor activity	4	0.000769971	GO:0004887
molecular_function	phospholipid binding	7	0.001347449	GO:0005543
molecular_function	oxidoreductase activity, acting on CH-OH group of donors	58	0.011164581	GO:0016614
molecular_function	carbon-sulfur lyase activity	3	0.000577478	GO:0016846
molecular_function	UFM1 activating enzyme activity	1	0.000192493	GO:0071566
molecular_function	RNA polymerase II transcription factor binding transcription factor activity	4	0.000769971	GO:0001076
molecular_function	oxidoreductase activity, acting on X-H and Y-H to form an X-Y bond	1	0.000192493	GO:0046992
molecular_function	cytoskeletal protein binding	62	0.011934552	GO:0008092
molecular_function	oxidoreductase activity, acting on NAD(P)H	24	0.004619827	GO:0016651
molecular_function	coenzyme binding	88	0.016939365	GO:0050662
molecular_function	chaperone binding	1	0.000192493	GO:0051087
molecular_function	extracellular matrix structural constituent conferring tensile strength	1	0.000192493	GO:0030020
molecular_function	protein N-terminus binding	3	0.000577478	GO:0047485
molecular_function	SNAP receptor activity	1	0.000192493	GO:0005484
molecular_function	dioxygenase activity	19	0.003657363	GO:0051213
molecular_function	neurotransmitter:sodium symporter activity	5	0.000962464	GO:0005328
molecular_function	lipoprotein particle binding	1	0.000192493	GO:0071813
molecular_function	transcription cofactor activity	10	0.001924928	GO:0003712
molecular_function	transferase activity, transferring alkyl or aryl (other than methyl) groups	10	0.001924928	GO:0016765
molecular_function	protein transporter activity	10	0.001924928	GO:0008565
molecular_function	phosphate transmembrane transporter activity	5	0.000962464	GO:1901677
molecular_function	DNA topoisomerase activity	3	0.000577478	GO:0003916
molecular_function	oxidoreductase activity, acting on the aldehyde or oxo group of donors	24	0.004619827	GO:0016903
molecular_function	scavenger receptor activity	3	0.000577478	GO:0005044
molecular_function	direct ligand regulated sequence-specific DNA binding transcription factor activity	8	0.001539942	GO:0098531
molecular_function	racemase and epimerase activity	4	0.000769971	GO:0016854
cellular_component	axon part	1	0.000192493	GO:0033267
cellular_component	TCTN-B9D complex	1	0.000192493	GO:0036038
cellular_component	basement membrane collagen trimer	1	0.000192493	GO:0098651
cellular_component	spliceosomal snRNP complex	1	0.000192493	GO:0097525
cellular_component	alkyl hydroperoxide reductase complex	2	0.000384986	GO:0009321
cellular_component	cell wall	6	0.001154957	GO:0005618
cellular_component	high-density lipoprotein particle	2	0.000384986	GO:0034364
cellular_component	envelope	59	0.011357074	GO:0031975
cellular_component	microbody membrane	1	0.000192493	GO:0031903
cellular_component	Arp2/3 protein complex	2	0.000384986	GO:0005885
cellular_component	signal recognition particle	2	0.000384986	GO:0048500
cellular_component	integral component of mitochondrial membrane	2	0.000384986	GO:0032592
cellular_component	integral component of synaptic vesicle membrane	1	0.000192493	GO:0030285
cellular_component	DUBm complex	1	0.000192493	GO:0071819
cellular_component	endosome membrane	2	0.000384986	GO:0010008
cellular_component	calcium- and calmodulin-dependent protein kinase complex	1	0.000192493	GO:0005954
cellular_component	cytoplasmic vesicle part	10	0.001924928	GO:0044433
cellular_component	tRNA-splicing ligase complex	1	0.000192493	GO:0072669
cellular_component	postsynaptic membrane	7	0.001347449	GO:0045211
cellular_component	cell projection part	6	0.001154957	GO:0044463
cellular_component	plastid part	2	0.000384986	GO:0044435
cellular_component	vesicle lumen	1	0.000192493	GO:0031983
cellular_component	ATP-binding cassette (ABC) transporter complex	2	0.000384986	GO:0043190
cellular_component	sperm part	1	0.000192493	GO:0097223
cellular_component	integral component of organelle membrane	11	0.002117421	GO:0031301
cellular_component	Golgi membrane	20	0.003849856	GO:0000139
cellular_component	caveola	1	0.000192493	GO:0005901
cellular_component	cell cortex	9	0.001732435	GO:0005938
cellular_component	organellar ribosome	4	0.000769971	GO:0000313
cellular_component	cell-substrate adherens junction	3	0.000577478	GO:0005924
cellular_component	endomembrane system	105	0.020211742	GO:0012505
cellular_component	eukaryotic translation initiation factor 2 complex	1	0.000192493	GO:0005850
cellular_component	glycine reductase complex	1	0.000192493	GO:0030700
cellular_component	organellar small ribosomal subunit	2	0.000384986	GO:0000314
cellular_component	neuron part	20	0.003849856	GO:0097458
cellular_component	brush border	2	0.000384986	GO:0005903
cellular_component	proteasome regulatory particle, base subcomplex	1	0.000192493	GO:0008540
cellular_component	mitochondrial respiratory chain complex I	3	0.000577478	GO:0005747
cellular_component	mitochondrial proton-transporting ATP synthase complex	5	0.000962464	GO:0005753
cellular_component	mitochondrial respiratory chain complex III	1	0.000192493	GO:0005750
cellular_component	protein phosphatase type 1 complex	1	0.000192493	GO:0000164
cellular_component	intracellular organelle	982	0.189027911	GO:0043229
cellular_component	myosin complex	37	0.007122233	GO:0016459
cellular_component	cell body	6	0.001154957	GO:0044297
cellular_component	germline ring canal	1	0.000192493	GO:0045172
cellular_component	synaptic vesicle membrane	1	0.000192493	GO:0030672
cellular_component	proteinaceous extracellular matrix	14	0.002694899	GO:0005578
cellular_component	pyruvate dehydrogenase complex	4	0.000769971	GO:0045254
cellular_component	ciliary cytoplasm	3	0.000577478	GO:0097014
cellular_component	contractile fiber part	6	0.001154957	GO:0044449
cellular_component	F-actin capping protein complex	2	0.000384986	GO:0008290
cellular_component	other organism cell	1	0.000192493	GO:0044216
cellular_component	plasma lipoprotein particle	2	0.000384986	GO:0034358
cellular_component	microtubule	80	0.015399423	GO:0005874
cellular_component	type I terminal bouton	1	0.000192493	GO:0061174
cellular_component	sperm individualization complex	1	0.000192493	GO:0070864
cellular_component	gap junction	10	0.001924928	GO:0005921
cellular_component	MCM complex	5	0.000962464	GO:0042555
cellular_component	proteasome core complex	11	0.002117421	GO:0005839
cellular_component	collagen trimer	3	0.000577478	GO:0005581
cellular_component	organelle inner membrane	42	0.008084697	GO:0019866
cellular_component	organelle outer membrane	5	0.000962464	GO:0031968
cellular_component	mitochondrial proton-transporting ATP synthase complex, catalytic core F(1)	1	0.000192493	GO:0000275
cellular_component	adherens junction	6	0.001154957	GO:0005912
cellular_component	extracellular organelle	19	0.003657363	GO:0043230
cellular_component	ionotropic glutamate receptor complex	3	0.000577478	GO:0008328
cellular_component	organelle envelope	59	0.011357074	GO:0031967
cellular_component	sarcomere	6	0.001154957	GO:0030017
cellular_component	cell projection	37	0.007122233	GO:0042995
cellular_component	intracellular membrane-bounded organelle	615	0.118383061	GO:0043231
cellular_component	neuron projection terminus	1	0.000192493	GO:0044306
cellular_component	vacuolar membrane	12	0.002309913	GO:0005774
cellular_component	complex of collagen trimers	1	0.000192493	GO:0098644
cellular_component	cation-transporting ATPase complex	2	0.000384986	GO:0090533
cellular_component	organellar large ribosomal subunit	1	0.000192493	GO:0000315
cellular_component	retromer complex	2	0.000384986	GO:0030904
cellular_component	clathrin adaptor complex	6	0.001154957	GO:0030131
cellular_component	endosomal part	2	0.000384986	GO:0044440
cellular_component	eukaryotic translation initiation factor 3 complex	8	0.001539942	GO:0005852
cellular_component	I band	1	0.000192493	GO:0031674
cellular_component	catenin complex	3	0.000577478	GO:0016342
cellular_component	transcriptional repressor complex	1	0.000192493	GO:0017053
cellular_component	cell surface	4	0.000769971	GO:0009986
cellular_component	ruffle	1	0.000192493	GO:0001726
cellular_component	cell pole	1	0.000192493	GO:0060187
cellular_component	neuronal cell body	6	0.001154957	GO:0043025
cellular_component	transmembrane transporter complex	32	0.006159769	GO:1902495
cellular_component	ribosome	153	0.029451396	GO:0005840
cellular_component	extrinsic component of organelle membrane	1	0.000192493	GO:0031312
cellular_component	hemoglobin complex	1	0.000192493	GO:0005833
cellular_component	proton-transporting ATP synthase complex, coupling factor F(o)	7	0.001347449	GO:0045263
cellular_component	organelle subcompartment	6	0.001154957	GO:0031984
cellular_component	mitochondrial part	63	0.012127045	GO:0044429
cellular_component	protein serine/threonine phosphatase complex	7	0.001347449	GO:0008287
cellular_component	endosome	8	0.001539942	GO:0005768
cellular_component	nuclear envelope	6	0.001154957	GO:0005635
cellular_component	DNA replication factor C complex	1	0.000192493	GO:0005663
cellular_component	transcription elongation factor complex	2	0.000384986	GO:0008023
cellular_component	ribonucleoprotein complex	196	0.037728585	GO:0030529
cellular_component	plasma membrane proton-transporting V-type ATPase complex	2	0.000384986	GO:0033181
cellular_component	cell projection cytoplasm	3	0.000577478	GO:0032838
cellular_component	viral nucleocapsid	14	0.002694899	GO:0019013
cellular_component	plasmodesma	2	0.000384986	GO:0009506
cellular_component	extrinsic component of mitochondrial inner membrane	1	0.000192493	GO:0031314
cellular_component	integral component of Golgi membrane	4	0.000769971	GO:0030173
cellular_component	Z disc	1	0.000192493	GO:0030018
cellular_component	intrinsic component of endoplasmic reticulum membrane	3	0.000577478	GO:0031227
cellular_component	DNA repair complex	6	0.001154957	GO:1990391
cellular_component	microtubule associated complex	38	0.007314726	GO:0005875
cellular_component	apical part of cell	8	0.001539942	GO:0045177
cellular_component	preribosome	1	0.000192493	GO:0030684
cellular_component	mitochondrial intermembrane space	4	0.000769971	GO:0005758
cellular_component	intrinsic component of plasma membrane	27	0.005197305	GO:0031226
cellular_component	dendritic spine	1	0.000192493	GO:0043197
cellular_component	DNA bending complex	11	0.002117421	GO:1990104
cellular_component	eukaryotic translation elongation factor 1 complex	2	0.000384986	GO:0005853
cellular_component	intracellular organelle lumen	113	0.021751684	GO:0070013
cellular_component	transport vesicle	3	0.000577478	GO:0030133
cellular_component	host cell part	1	0.000192493	GO:0033643
cellular_component	filopodium	2	0.000384986	GO:0030175
cellular_component	other organism part	1	0.000192493	GO:0044217
cellular_component	core TFIIH complex	1	0.000192493	GO:0000439
cellular_component	RNA polymerase complex	16	0.003079885	GO:0030880
cellular_component	axoneme part	2	0.000384986	GO:0044447
cellular_component	cell division site part	1	0.000192493	GO:0032155
cellular_component	aster	1	0.000192493	GO:0005818
cellular_component	BBSome	4	0.000769971	GO:0034464
cellular_component	vesicle coat	7	0.001347449	GO:0030120
cellular_component	cytoplasmic part	490	0.094321463	GO:0044444
cellular_component	respiratory chain	21	0.004042348	GO:0070469
cellular_component	mitochondrial membrane	48	0.009239654	GO:0031966
cellular_component	cAMP-dependent protein kinase complex	5	0.000962464	GO:0005952
cellular_component	kinetochore	2	0.000384986	GO:0000776
cellular_component	microbody part	2	0.000384986	GO:0044438
cellular_component	transporter complex	32	0.006159769	GO:1990351
cellular_component	membrane-bounded vesicle	40	0.007699711	GO:0031988
cellular_component	small nuclear ribonucleoprotein complex	4	0.000769971	GO:0030532
cellular_component	receptor complex	3	0.000577478	GO:0043235
cellular_component	carboxy-terminal domain protein kinase complex	2	0.000384986	GO:0032806
cellular_component	secretory granule	2	0.000384986	GO:0030141
cellular_component	ribonucleoside-diphosphate reductase complex	2	0.000384986	GO:0005971
cellular_component	gamma-tubulin complex	1	0.000192493	GO:0000930
cellular_component	clathrin coat of coated pit	4	0.000769971	GO:0030132
cellular_component	basolateral plasma membrane	3	0.000577478	GO:0016323
cellular_component	CCR4-NOT complex	3	0.000577478	GO:0030014
cellular_component	transcription export complex 2	1	0.000192493	GO:0070390
cellular_component	ribonucleoprotein granule	4	0.000769971	GO:0035770
cellular_component	ciliary transition zone	1	0.000192493	GO:0035869
cellular_component	GPI-anchor transamidase complex	1	0.000192493	GO:0042765
cellular_component	cell periphery	126	0.02425409	GO:0071944
cellular_component	fatty acid synthase complex	1	0.000192493	GO:0005835
cellular_component	extracellular space	18	0.00346487	GO:0005615
cellular_component	mitochondrial respiratory chain	4	0.000769971	GO:0005746
cellular_component	ciliary basal body	2	0.000384986	GO:0036064
cellular_component	membrane coat	19	0.003657363	GO:0030117
cellular_component	Golgi apparatus	44	0.008469682	GO:0005794
cellular_component	myofilament	3	0.000577478	GO:0036379
cellular_component	proton-transporting two-sector ATPase complex	26	0.005004812	GO:0016469
cellular_component	AP-2 adaptor complex	1	0.000192493	GO:0030122
cellular_component	respiratory chain complex IV	11	0.002117421	GO:0045277
cellular_component	stereocilium	1	0.000192493	GO:0032420
cellular_component	nuclear membrane	4	0.000769971	GO:0031965
cellular_component	glycine cleavage complex	1	0.000192493	GO:0005960
cellular_component	intracellular organelle part	460	0.088546679	GO:0044446
cellular_component	sublamina densa	1	0.000192493	GO:0061618
cellular_component	glycerol-3-phosphate dehydrogenase complex	5	0.000962464	GO:0009331
cellular_component	cell surface furrow	1	0.000192493	GO:0097610
cellular_component	proton-transporting V-type ATPase, V0 domain	7	0.001347449	GO:0033179
cellular_component	nuclear pore	2	0.000384986	GO:0005643
cellular_component	axoneme	3	0.000577478	GO:0005930
cellular_component	membrane region	24	0.004619827	GO:0098589
cellular_component	cleavage furrow	1	0.000192493	GO:0032154
cellular_component	insulin-like growth factor binding protein complex	1	0.000192493	GO:0016942
cellular_component	intercellular bridge	1	0.000192493	GO:0045171
cellular_component	proton-transporting two-sector ATPase complex, catalytic domain	11	0.002117421	GO:0033178
cellular_component	basement membrane	3	0.000577478	GO:0005604
cellular_component	intrinsic component of mitochondrial membrane	2	0.000384986	GO:0098573
cellular_component	muscle myosin complex	1	0.000192493	GO:0005859
cellular_component	proteasome regulatory particle	1	0.000192493	GO:0005838
cellular_component	intrinsic component of membrane	407	0.078344562	GO:0031224
cellular_component	proton-transporting two-sector ATPase complex, proton-transporting domain	14	0.002694899	GO:0033177
cellular_component	RNA cap binding complex	2	0.000384986	GO:0034518
cellular_component	PTW/PP1 phosphatase complex	1	0.000192493	GO:0072357
cellular_component	mRNA cleavage factor complex	1	0.000192493	GO:0005849
cellular_component	leading edge membrane	1	0.000192493	GO:0031256
cellular_component	cilium	13	0.002502406	GO:0005929
cellular_component	proton-transporting ATP synthase complex	13	0.002502406	GO:0045259
cellular_component	ER membrane insertion complex	1	0.000192493	GO:0072379
cellular_component	respiratory chain complex I	3	0.000577478	GO:0045271
cellular_component	terminal bouton	1	0.000192493	GO:0043195
cellular_component	catalytic complex	119	0.022906641	GO:1902494
cellular_component	ATPase dependent transmembrane transport complex	4	0.000769971	GO:0098533
cellular_component	extrinsic component of plasma membrane	6	0.001154957	GO:0019897
cellular_component	chromosome, centromeric region	5	0.000962464	GO:0000775
cellular_component	translation preinitiation complex	11	0.002117421	GO:0070993
cellular_component	mismatch repair complex	3	0.000577478	GO:0032300
cellular_component	extrinsic component of cytoplasmic side of plasma membrane	3	0.000577478	GO:0031234
cellular_component	nuclear part	119	0.022906641	GO:0044428
cellular_component	organelle envelope lumen	4	0.000769971	GO:0031970
cellular_component	cell leading edge	4	0.000769971	GO:0031252
cellular_component	apical plasma membrane	5	0.000962464	GO:0016324
cellular_component	mitochondrial ribosome	4	0.000769971	GO:0005761
cellular_component	sarcolemma	1	0.000192493	GO:0042383
cellular_component	cytoplasm	727	0.139942252	GO:0005737
cellular_component	coated pit	4	0.000769971	GO:0005905
cellular_component	sodium:potassium-exchanging ATPase complex	2	0.000384986	GO:0005890
cellular_component	chromosomal part	57	0.010972089	GO:0044427
cellular_component	NADH dehydrogenase complex	3	0.000577478	GO:0030964
cellular_component	cell division site	1	0.000192493	GO:0032153
cellular_component	apicolateral plasma membrane	2	0.000384986	GO:0016327
cellular_component	AP-type membrane coat adaptor complex	7	0.001347449	GO:0030119
cellular_component	viral capsid	14	0.002694899	GO:0019028
cellular_component	organelle lumen	114	0.021944177	GO:0043233
cellular_component	bursicon neuropeptide hormone complex	1	0.000192493	GO:0031395
cellular_component	ubiquitin ligase complex	10	0.001924928	GO:0000151
cellular_component	protein kinase CK2 complex	1	0.000192493	GO:0005956
cellular_component	ER membrane protein complex	1	0.000192493	GO:0072546
cellular_component	translocon complex	1	0.000192493	GO:0071256
cellular_component	midbody	6	0.001154957	GO:0030496
cellular_component	growth factor complex	1	0.000192493	GO:0036454
cellular_component	collagen type IV trimer	1	0.000192493	GO:0005587
cellular_component	endoplasmic reticulum membrane	14	0.002694899	GO:0005789
cellular_component	other organism	1	0.000192493	GO:0044215
cellular_component	endoplasmic reticulum	43	0.00827719	GO:0005783
cellular_component	intracellular	1406	0.270644851	GO:0005622
cellular_component	proton-transporting V-type ATPase, V1 domain	4	0.000769971	GO:0033180
cellular_component	flotillin complex	1	0.000192493	GO:0016600
cellular_component	heterotrimeric G-protein complex	3	0.000577478	GO:0005834
cellular_component	external encapsulating structure	6	0.001154957	GO:0030312
cellular_component	glucosidase II complex	4	0.000769971	GO:0017177
cellular_component	proton-transporting V-type ATPase complex	12	0.002309913	GO:0033176
cellular_component	Nem1-Spo7 phosphatase complex	1	0.000192493	GO:0071595
cellular_component	membrane raft	2	0.000384986	GO:0045121
cellular_component	extraorganismal space	1	0.000192493	GO:0043245
cellular_component	nuclear cap binding complex	2	0.000384986	GO:0005846
cellular_component	transcription factor complex	104	0.020019249	GO:0005667
cellular_component	intrinsic component of organelle membrane	11	0.002117421	GO:0031300
cellular_component	TOR complex	2	0.000384986	GO:0038201
cellular_component	acrosomal vesicle	1	0.000192493	GO:0001669
cellular_component	cytoskeletal part	165	0.031761309	GO:0044430
cellular_component	mannosyltransferase complex	3	0.000577478	GO:0031501
cellular_component	cell-cell adherens junction	2	0.000384986	GO:0005913
cellular_component	T-tubule	1	0.000192493	GO:0030315
cellular_component	extracellular membrane-bounded organelle	19	0.003657363	GO:0065010
cellular_component	prefoldin complex	2	0.000384986	GO:0016272
cellular_component	Golgi apparatus part	24	0.004619827	GO:0044431
cellular_component	integral component of membrane	406	0.078152069	GO:0016021
cellular_component	proteasome complex	26	0.005004812	GO:0000502
cellular_component	DNA polymerase complex	4	0.000769971	GO:0042575
cellular_component	protein phosphatase type 2A complex	2	0.000384986	GO:0000159
cellular_component	cell tip	1	0.000192493	GO:0051286
cellular_component	mitochondrial proton-transporting ATP synthase complex, coupling factor F(o)	4	0.000769971	GO:0000276
cellular_component	pore complex	2	0.000384986	GO:0046930
cellular_component	mitochondrial inner membrane peptidase complex	4	0.000769971	GO:0042720
cellular_component	acrosomal membrane	1	0.000192493	GO:0002080
cellular_component	ribosomal subunit	25	0.00481232	GO:0044391
cellular_component	primosome complex	1	0.000192493	GO:1990077
cellular_component	organelle membrane	101	0.019441771	GO:0031090
cellular_component	integral component of endoplasmic reticulum membrane	3	0.000577478	GO:0030176
cellular_component	translation release factor complex	3	0.000577478	GO:0018444
cellular_component	proteasome core complex, alpha-subunit complex	7	0.001347449	GO:0019773
cellular_component	lamellipodium	2	0.000384986	GO:0030027
cellular_component	microvillus	1	0.000192493	GO:0005902
cellular_component	mitochondrial membrane part	18	0.00346487	GO:0044455
cellular_component	condensed chromosome outer kinetochore	1	0.000192493	GO:0000940
cellular_component	synaptic vesicle	7	0.001347449	GO:0008021
cellular_component	cation channel complex	24	0.004619827	GO:0034703
cellular_component	intracellular part	1293	0.248893167	GO:0044424
cellular_component	RNAi effector complex	1	0.000192493	GO:0031332
cellular_component	aspartate carbamoyltransferase complex	2	0.000384986	GO:0009347
cellular_component	proteasome activator complex	1	0.000192493	GO:0008537
cellular_component	small nucleolar ribonucleoprotein complex	2	0.000384986	GO:0005732
cellular_component	WASH complex	2	0.000384986	GO:0071203
cellular_component	proton-transporting ATP synthase complex, catalytic core F(1)	6	0.001154957	GO:0045261
cellular_component	basal part of cell	1	0.000192493	GO:0045178
cellular_component	oligosaccharyltransferase complex	4	0.000769971	GO:0008250
cellular_component	ciliary part	4	0.000769971	GO:0044441
cellular_component	septin complex	3	0.000577478	GO:0031105
cellular_component	GMP reductase complex	1	0.000192493	GO:1902560
cellular_component	presynaptic active zone	2	0.000384986	GO:0048786
cellular_component	cytoplasmic vesicle	22	0.004234841	GO:0031410
cellular_component	nonhomologous end joining complex	1	0.000192493	GO:0070419
cellular_component	protein acetyltransferase complex	7	0.001347449	GO:0031248
cellular_component	voltage-gated calcium channel complex	4	0.000769971	GO:0005891
cellular_component	Sec61 translocon complex	1	0.000192493	GO:0005784
cellular_component	basal plasma membrane	1	0.000192493	GO:0009925
cellular_component	DNA packaging complex	11	0.002117421	GO:0044815
cellular_component	endoplasmic reticulum part	18	0.00346487	GO:0044432
cellular_component	spindle midzone	2	0.000384986	GO:0051233
cellular_component	troponin complex	2	0.000384986	GO:0005861
cellular_component	mediator complex	3	0.000577478	GO:0016592
cellular_component	plasma membrane region	9	0.001732435	GO:0098590
cellular_component	dihydrolipoyl dehydrogenase complex	1	0.000192493	GO:0045240
cellular_component	plasma membrane part	64	0.012319538	GO:0044459
cellular_component	integral component of plasma membrane	27	0.005197305	GO:0005887
cellular_component	rough endoplasmic reticulum membrane	1	0.000192493	GO:0030867
cellular_component	extrinsic component of membrane	14	0.002694899	GO:0019898
cellular_component	neuron projection	17	0.003272377	GO:0043005
cellular_component	TORC1 complex	2	0.000384986	GO:0031931
cellular_component	nucleotide-excision repair complex	2	0.000384986	GO:0000109
cellular_component	plasma membrane	116	0.022329163	GO:0005886
cellular_component	bounding membrane of organelle	53	0.010202117	GO:0098588
cellular_component	respiratory chain complex III	1	0.000192493	GO:0045275
cellular_component	clathrin coat	9	0.001732435	GO:0030118
cellular_component	cohesin complex	1	0.000192493	GO:0008278
cellular_component	somatodendritic compartment	10	0.001924928	GO:0036477
cellular_component	intrinsic component of Golgi membrane	4	0.000769971	GO:0031228
cellular_component	AP-3 adaptor complex	1	0.000192493	GO:0030123
cellular_component	spliceosomal complex	8	0.001539942	GO:0005681
cellular_component	vacuolar part	14	0.002694899	GO:0044437
cellular_component	voltage-gated potassium channel complex	15	0.002887392	GO:0008076
cellular_component	intracellular non-membrane-bounded organelle	476	0.091626564	GO:0043232
cellular_component	ion channel complex	27	0.005197305	GO:0034702
cellular_component	tricarboxylic acid cycle enzyme complex	4	0.000769971	GO:0045239
cellular_component	intrinsic component of synaptic vesicle membrane	1	0.000192493	GO:0098563
cellular_component	tubulin complex	25	0.00481232	GO:0045298
cellular_component	vesicle membrane	9	0.001732435	GO:0012506
cellular_component	nuclear outer membrane-endoplasmic reticulum membrane network	15	0.002887392	GO:0042175
cellular_component	mitochondrial inner membrane presequence translocase complex	2	0.000384986	GO:0005744
cellular_component	replisome	1	0.000192493	GO:0030894
cellular_component	molybdopterin synthase complex	2	0.000384986	GO:0019008
cellular_component	alpha-1,6-mannosyltransferase complex	3	0.000577478	GO:0000136
cellular_component	DNA polymerase processivity factor complex	1	0.000192493	GO:0044796
cellular_component	oxidoreductase complex	21	0.004042348	GO:1990204
cellular_component	postsynaptic density	1	0.000192493	GO:0014069
cellular_component	proteasome accessory complex	3	0.000577478	GO:0022624
cellular_component	dystrophin-associated glycoprotein complex	1	0.000192493	GO:0016010
cellular_component	synaptic membrane	7	0.001347449	GO:0097060
cellular_component	cytochrome complex	12	0.002309913	GO:0070069
biological_process	negative regulation of developmental process	15	0.002887392	GO:0051093
biological_process	positive regulation of cell activation	4	0.000769971	GO:0050867
biological_process	head development	1	0.000192493	GO:0060322
biological_process	regulation of viral process	4	0.000769971	GO:0050792
biological_process	positive regulation of cellular process	75	0.014436959	GO:0048522
biological_process	cerebellar Purkinje cell layer morphogenesis	2	0.000384986	GO:0021692
biological_process	positive regulation of cellular component organization	7	0.001347449	GO:0051130
biological_process	amino-acid betaine metabolic process	1	0.000192493	GO:0006577
biological_process	immune response-activating signal transduction	4	0.000769971	GO:0002757
biological_process	tissue regeneration	3	0.000577478	GO:0042246
biological_process	regulation of locomotion	10	0.001924928	GO:0040012
biological_process	removal of superoxide radicals	3	0.000577478	GO:0019430
biological_process	establishment of protein localization to membrane	8	0.001539942	GO:0090150
biological_process	neural precursor cell proliferation	5	0.000962464	GO:0061351
biological_process	mechanosensory behavior	1	0.000192493	GO:0007638
biological_process	vocalization behavior	1	0.000192493	GO:0071625
biological_process	negative regulation of cellular component organization	16	0.003079885	GO:0051129
biological_process	regulation of hormone levels	6	0.001154957	GO:0010817
biological_process	cell-cell signaling	38	0.007314726	GO:0007267
biological_process	multi-organism behavior	4	0.000769971	GO:0051705
biological_process	adult behavior	1	0.000192493	GO:0030534
biological_process	humoral immune response	5	0.000962464	GO:0006959
biological_process	negative regulation of viral process	2	0.000384986	GO:0048525
biological_process	energy derivation by oxidation of organic compounds	61	0.01174206	GO:0015980
biological_process	sex differentiation	6	0.001154957	GO:0007548
biological_process	regulation of defense response to bacterium	1	0.000192493	GO:1900424
biological_process	nucleobase-containing small molecule metabolic process	438	0.084311838	GO:0055086
biological_process	germ-line cyst formation	3	0.000577478	GO:0048134
biological_process	lipid storage	2	0.000384986	GO:0019915
biological_process	regulation of leukocyte differentiation	3	0.000577478	GO:1902105
biological_process	diencephalon development	3	0.000577478	GO:0021536
biological_process	macromolecule methylation	20	0.003849856	GO:0043414
biological_process	organ morphogenesis	44	0.008469682	GO:0009887
biological_process	detection of chemical stimulus	4	0.000769971	GO:0009593
biological_process	cuticle development	1	0.000192493	GO:0042335
biological_process	post-embryonic morphogenesis	16	0.003079885	GO:0009886
biological_process	signal transduction	482	0.092781521	GO:0007165
biological_process	iron-sulfur cluster assembly	6	0.001154957	GO:0016226
biological_process	S phase	1	0.000192493	GO:0051320
biological_process	response to oxidative stress	28	0.005389798	GO:0006979
biological_process	cell junction organization	3	0.000577478	GO:0034330
biological_process	germ cell development	21	0.004042348	GO:0007281
biological_process	photoreceptor cell maintenance	2	0.000384986	GO:0045494
biological_process	pigment metabolic process	9	0.001732435	GO:0042440
biological_process	response to xenobiotic stimulus	7	0.001347449	GO:0009410
biological_process	stem cell maintenance	1	0.000192493	GO:0019827
biological_process	regulation of transporter activity	3	0.000577478	GO:0032409
biological_process	positive regulation of metabolic process	44	0.008469682	GO:0009893
biological_process	cellular component assembly involved in morphogenesis	19	0.003657363	GO:0010927
biological_process	regulation of macromolecule metabolic process	320	0.06159769	GO:0060255
biological_process	placenta development	1	0.000192493	GO:0001890
biological_process	positive regulation of cell morphogenesis involved in differentiation	1	0.000192493	GO:0010770
biological_process	regulation of sequence-specific DNA binding transcription factor activity	1	0.000192493	GO:0051090
biological_process	developmental maturation	6	0.001154957	GO:0021700
biological_process	nitric oxide metabolic process	7	0.001347449	GO:0046209
biological_process	DNA repair	40	0.007699711	GO:0006281
biological_process	protein transport	102	0.019634264	GO:0015031
biological_process	lymph vessel development	1	0.000192493	GO:0001945
biological_process	extracellular structure organization	1	0.000192493	GO:0043062
biological_process	movement in host environment	1	0.000192493	GO:0052126
biological_process	defense response	19	0.003657363	GO:0006952
biological_process	regulation of production of molecular mediator of immune response	2	0.000384986	GO:0002700
biological_process	negative regulation of secretion	3	0.000577478	GO:0051048
biological_process	response to virus	3	0.000577478	GO:0009615
biological_process	olefin metabolic process	2	0.000384986	GO:1900673
biological_process	mitochondrion organization	12	0.002309913	GO:0007005
biological_process	single-organism transport	407	0.078344562	GO:0044765
biological_process	osteoblast proliferation	1	0.000192493	GO:0033687
biological_process	dendrite development	10	0.001924928	GO:0016358
biological_process	negative regulation of response to external stimulus	1	0.000192493	GO:0032102
biological_process	cell cycle	96	0.018479307	GO:0007049
biological_process	stem cell proliferation	4	0.000769971	GO:0072089
biological_process	organophosphate ester transport	4	0.000769971	GO:0015748
biological_process	keratinization	1	0.000192493	GO:0031424
biological_process	ventral cord development	1	0.000192493	GO:0007419
biological_process	actin filament-based process	23	0.004427334	GO:0030029
biological_process	organic substance biosynthetic process	733	0.141097209	GO:1901576
biological_process	establishment of tissue polarity	11	0.002117421	GO:0007164
biological_process	cell wall biogenesis	11	0.002117421	GO:0042546
biological_process	negative regulation of multi-organism process	2	0.000384986	GO:0043901
biological_process	regulation of synapse assembly	5	0.000962464	GO:0051963
biological_process	protein insertion into membrane	3	0.000577478	GO:0051205
biological_process	positive regulation of cell differentiation	6	0.001154957	GO:0045597
biological_process	negative regulation of cell motility	2	0.000384986	GO:2000146
biological_process	positive regulation of leukocyte activation	4	0.000769971	GO:0002696
biological_process	cell motility	22	0.004234841	GO:0048870
biological_process	diencephalon morphogenesis	1	0.000192493	GO:0048852
biological_process	response to transforming growth factor beta	9	0.001732435	GO:0071559
biological_process	negative regulation of cell death	8	0.001539942	GO:0060548
biological_process	tube development	9	0.001732435	GO:0035295
biological_process	cellular lipid metabolic process	108	0.02078922	GO:0044255
biological_process	antimicrobial peptide production	1	0.000192493	GO:0002775
biological_process	cell cycle process	56	0.010779596	GO:0022402
biological_process	ovarian nurse cell to oocyte transport	1	0.000192493	GO:0007300
biological_process	multicellular organismal signaling	2	0.000384986	GO:0035637
biological_process	positive regulation of production of molecular mediator of immune response	1	0.000192493	GO:0002702
biological_process	synaptic vesicle transport	2	0.000384986	GO:0048489
biological_process	establishment of localization in cell	92	0.017709336	GO:0051649
biological_process	kidney development	3	0.000577478	GO:0001822
biological_process	cell redox homeostasis	23	0.004427334	GO:0045454
biological_process	establishment of anatomical structure orientation	1	0.000192493	GO:0048560
biological_process	germline ring canal formation	1	0.000192493	GO:0030725
biological_process	nitrogen cycle metabolic process	2	0.000384986	GO:0071941
biological_process	cellular ketone body metabolic process	3	0.000577478	GO:0046950
biological_process	olfactory bulb development	1	0.000192493	GO:0021772
biological_process	negative regulation of biological process	106	0.020404235	GO:0048519
biological_process	palate development	3	0.000577478	GO:0060021
biological_process	rhabdomere development	1	0.000192493	GO:0042052
biological_process	pigment metabolic process involved in pigmentation	2	0.000384986	GO:0043474
biological_process	positive regulation of signaling	15	0.002887392	GO:0023056
biological_process	reproductive structure development	7	0.001347449	GO:0048608
biological_process	telomere maintenance	2	0.000384986	GO:0000723
biological_process	reciprocal meiotic recombination	4	0.000769971	GO:0007131
biological_process	ommochrome metabolic process	1	0.000192493	GO:0046152
biological_process	positive regulation of secretion	1	0.000192493	GO:0051047
biological_process	regulation of multi-organism process	8	0.001539942	GO:0043900
biological_process	organic cyclic compound metabolic process	1043	0.200769971	GO:1901360
biological_process	regulation of cell morphogenesis	11	0.002117421	GO:0022604
biological_process	cellular carbohydrate metabolic process	58	0.011164581	GO:0044262
biological_process	execution phase of apoptosis	1	0.000192493	GO:0097194
biological_process	negative regulation of protein complex disassembly	4	0.000769971	GO:0043242
biological_process	vesicle-mediated transport	59	0.011357074	GO:0016192
biological_process	protein localization	120	0.023099134	GO:0008104
biological_process	regulation of cell projection organization	11	0.002117421	GO:0031344
biological_process	cellular response to chemical stimulus	61	0.01174206	GO:0070887
biological_process	response to temperature stimulus	9	0.001732435	GO:0009266
biological_process	regulation of cytokine production	3	0.000577478	GO:0001817
biological_process	cell recognition	5	0.000962464	GO:0008037
biological_process	regulation of telomere maintenance	1	0.000192493	GO:0032204
biological_process	organic phosphonate transport	1	0.000192493	GO:0015716
biological_process	metencephalon development	5	0.000962464	GO:0022037
biological_process	telencephalon development	2	0.000384986	GO:0021537
biological_process	regulation of transport	24	0.004619827	GO:0051049
biological_process	positive regulation of cell death	4	0.000769971	GO:0010942
biological_process	positive regulation of heart contraction	2	0.000384986	GO:0045823
biological_process	respiratory tube development	1	0.000192493	GO:0030323
biological_process	negative regulation of nitrogen compound metabolic process	21	0.004042348	GO:0051172
biological_process	regulation of cell motility	7	0.001347449	GO:2000145
biological_process	positive regulation of immune effector process	1	0.000192493	GO:0002699
biological_process	regulation of myeloid cell differentiation	2	0.000384986	GO:0045637
biological_process	carbon fixation	9	0.001732435	GO:0015977
biological_process	protein metabolic process	821	0.158036574	GO:0019538
biological_process	positive regulation of developmental growth	1	0.000192493	GO:0048639
biological_process	adenohypophysis development	1	0.000192493	GO:0021984
biological_process	secretion by cell	13	0.002502406	GO:0032940
biological_process	body morphogenesis	2	0.000384986	GO:0010171
biological_process	hormone biosynthetic process	2	0.000384986	GO:0042446
biological_process	peptidoglycan biosynthetic process	9	0.001732435	GO:0009252
biological_process	negative regulation of developmental growth	1	0.000192493	GO:0048640
biological_process	single-organism organelle organization	109	0.020981713	GO:1902589
biological_process	cerebellar Purkinje cell layer formation	2	0.000384986	GO:0021694
biological_process	production of molecular mediator involved in inflammatory response	1	0.000192493	GO:0002532
biological_process	response to sterol depletion	1	0.000192493	GO:0006991
biological_process	pattern specification process	25	0.00481232	GO:0007389
biological_process	defense response to virus	2	0.000384986	GO:0051607
biological_process	startle response	1	0.000192493	GO:0001964
biological_process	positive regulation of gastrulation	1	0.000192493	GO:2000543
biological_process	regulation of heart rate	3	0.000577478	GO:0002027
biological_process	membrane organization	15	0.002887392	GO:0061024
biological_process	multicellular organismal reproductive process	34	0.006544755	GO:0048609
biological_process	tricarboxylic acid cycle	29	0.005582291	GO:0006099
biological_process	developmental pigmentation	4	0.000769971	GO:0048066
biological_process	regulation of system process	5	0.000962464	GO:0044057
biological_process	cell-substrate adhesion	4	0.000769971	GO:0031589
biological_process	halogenated hydrocarbon metabolic process	5	0.000962464	GO:0042197
biological_process	regulation of multicellular organismal development	34	0.006544755	GO:2000026
biological_process	establishment of nucleus localization	3	0.000577478	GO:0040023
biological_process	maintenance of location	9	0.001732435	GO:0051235
biological_process	xenobiotic metabolic process	7	0.001347449	GO:0006805
biological_process	chromosome organization	59	0.011357074	GO:0051276
biological_process	regulation of hormone metabolic process	2	0.000384986	GO:0032350
biological_process	chromosome segregation	7	0.001347449	GO:0007059
biological_process	negative regulation of exocytosis	1	0.000192493	GO:0045920
biological_process	maintenance of DNA repeat elements	1	0.000192493	GO:0043570
biological_process	rhodopsin metabolic process	1	0.000192493	GO:0046154
biological_process	protein localization to membrane	8	0.001539942	GO:0072657
biological_process	DNA packaging	18	0.00346487	GO:0006323
biological_process	detection of stimulus involved in sensory perception	2	0.000384986	GO:0050906
biological_process	response to nutrient	1	0.000192493	GO:0007584
biological_process	establishment of vesicle localization	4	0.000769971	GO:0051650
biological_process	maintenance of protein location	5	0.000962464	GO:0045185
biological_process	neural retina development	1	0.000192493	GO:0003407
biological_process	hormone transport	2	0.000384986	GO:0009914
biological_process	inositol metabolic process	11	0.002117421	GO:0006020
biological_process	hindbrain development	5	0.000962464	GO:0030902
biological_process	response to organonitrogen compound	3	0.000577478	GO:0010243
biological_process	meiotic nuclear division	12	0.002309913	GO:0007126
biological_process	prenylation	1	0.000192493	GO:0097354
biological_process	erythrocyte homeostasis	3	0.000577478	GO:0034101
biological_process	thioester metabolic process	6	0.001154957	GO:0035383
biological_process	positive regulation of protein complex disassembly	1	0.000192493	GO:0043243
biological_process	multicellular organismal metabolic process	5	0.000962464	GO:0044236
biological_process	taxis	22	0.004234841	GO:0042330
biological_process	negative regulation of cellular metabolic process	36	0.00692974	GO:0031324
biological_process	regulation of synapse structure and activity	6	0.001154957	GO:0050803
biological_process	regulation of cellular component size	10	0.001924928	GO:0032535
biological_process	regulation of cellular component organization	52	0.010009625	GO:0051128
biological_process	response to platelet-derived growth factor	1	0.000192493	GO:0036119
biological_process	blood vessel development	5	0.000962464	GO:0001568
biological_process	cell division	65	0.012512031	GO:0051301
biological_process	single-organism cellular localization	16	0.003079885	GO:1902580
biological_process	regulation of multicellular organismal process	46	0.008854668	GO:0051239
biological_process	antigen processing and presentation of exogenous antigen	2	0.000384986	GO:0019884
biological_process	hindbrain morphogenesis	2	0.000384986	GO:0021575
biological_process	intercellular transport	2	0.000384986	GO:0010496
biological_process	macromolecular complex subunit organization	116	0.022329163	GO:0043933
biological_process	epithelial cell proliferation	2	0.000384986	GO:0050673
biological_process	organelle fusion	1	0.000192493	GO:0048284
biological_process	positive regulation of cell communication	15	0.002887392	GO:0010647
biological_process	regulation of response to biotic stimulus	2	0.000384986	GO:0002831
biological_process	regulation of antimicrobial humoral response	1	0.000192493	GO:0002759
biological_process	organic hydroxy compound transport	2	0.000384986	GO:0015850
biological_process	nitrogen compound transport	23	0.004427334	GO:0071705
biological_process	response to topologically incorrect protein	1	0.000192493	GO:0035966
biological_process	cell activation involved in immune response	1	0.000192493	GO:0002263
biological_process	single-organism intracellular transport	38	0.007314726	GO:1902582
biological_process	positive regulation of response to stimulus	17	0.003272377	GO:0048584
biological_process	lipid localization	13	0.002502406	GO:0010876
biological_process	lens development in camera-type eye	1	0.000192493	GO:0002088
biological_process	cytoskeleton organization	44	0.008469682	GO:0007010
biological_process	regulation of viral entry into host cell	1	0.000192493	GO:0046596
biological_process	M phase	1	0.000192493	GO:0000279
biological_process	fusome organization	1	0.000192493	GO:0045478
biological_process	mushroom body development	3	0.000577478	GO:0016319
biological_process	small molecule metabolic process	828	0.159384023	GO:0044281
biological_process	pteridine biosynthetic process	1	0.000192493	GO:0006728
biological_process	regulation of protein localization	7	0.001347449	GO:0032880
biological_process	regulation of development, heterochronic	2	0.000384986	GO:0040034
biological_process	establishment of protein localization to organelle	15	0.002887392	GO:0072594
biological_process	hematopoietic or lymphoid organ development	16	0.003079885	GO:0048534
biological_process	peroxisome organization	3	0.000577478	GO:0007031
biological_process	positive regulation of viral process	2	0.000384986	GO:0048524
biological_process	negative regulation of multicellular organismal process	3	0.000577478	GO:0051241
biological_process	regulation of blood pressure	2	0.000384986	GO:0008217
biological_process	encapsulation of foreign target	3	0.000577478	GO:0035010
biological_process	cellular amino acid metabolic process	327	0.06294514	GO:0006520
biological_process	regulation of signal transduction	111	0.021366699	GO:0009966
biological_process	regulation of protein stability	3	0.000577478	GO:0031647
biological_process	positive regulation of defense response	3	0.000577478	GO:0031349
biological_process	glycolytic process	33	0.006352262	GO:0006096
biological_process	regulation of cellular localization	12	0.002309913	GO:0060341
biological_process	sperm individualization	1	0.000192493	GO:0007291
biological_process	hydrogen transport	54	0.01039461	GO:0006818
biological_process	negative regulation of molecular function	21	0.004042348	GO:0044092
biological_process	regulation of immune system process	14	0.002694899	GO:0002682
biological_process	protein glycosylation	22	0.004234841	GO:0006486
biological_process	positive regulation of macromolecule metabolic process	41	0.007892204	GO:0010604
biological_process	primitive streak formation	1	0.000192493	GO:0090009
biological_process	energy taxis	2	0.000384986	GO:0009453
biological_process	ectopic germ cell programmed cell death	1	0.000192493	GO:0035234
biological_process	cellular alkane metabolic process	2	0.000384986	GO:0043446
biological_process	neural nucleus development	2	0.000384986	GO:0048857
biological_process	organic hydroxy compound metabolic process	36	0.00692974	GO:1901615
biological_process	organophosphate metabolic process	434	0.083541867	GO:0019637
biological_process	negative regulation of cell differentiation	13	0.002502406	GO:0045596
biological_process	system development	151	0.02906641	GO:0048731
biological_process	bone morphogenesis	3	0.000577478	GO:0060349
biological_process	positive regulation of signal transduction	14	0.002694899	GO:0009967
biological_process	mating	4	0.000769971	GO:0007618
biological_process	regulation of homeostatic process	4	0.000769971	GO:0032844
biological_process	filamentous growth of a population of unicellular organisms in response to biotic stimulus	1	0.000192493	GO:0036180
biological_process	entry into other organism involved in symbiotic interaction	1	0.000192493	GO:0051828
biological_process	ether metabolic process	3	0.000577478	GO:0018904
biological_process	Golgi organization	1	0.000192493	GO:0007030
biological_process	melanin metabolic process	2	0.000384986	GO:0006582
biological_process	RNA transport	3	0.000577478	GO:0050658
biological_process	developmental cell growth	9	0.001732435	GO:0048588
biological_process	regulation of signaling	117	0.022521655	GO:0023051
biological_process	somatic diversification of immune receptors	3	0.000577478	GO:0002200
biological_process	positive regulation of cell division	2	0.000384986	GO:0051781
biological_process	establishment of protein localization	106	0.020404235	GO:0045184
biological_process	positive regulation of immune response	4	0.000769971	GO:0050778
biological_process	pons development	1	0.000192493	GO:0021548
biological_process	regulation of epithelial cell migration	2	0.000384986	GO:0010632
biological_process	meiotic cell cycle process	9	0.001732435	GO:1903046
biological_process	endomembrane system organization	5	0.000962464	GO:0010256
biological_process	regulation of endocytosis	2	0.000384986	GO:0030100
biological_process	germarium-derived egg chamber formation	4	0.000769971	GO:0007293
biological_process	establishment or maintenance of cell polarity	15	0.002887392	GO:0007163
biological_process	positive regulation of sequestering of triglyceride	1	0.000192493	GO:0010890
biological_process	cellular ketone metabolic process	15	0.002887392	GO:0042180
biological_process	sulfur compound metabolic process	39	0.007507218	GO:0006790
biological_process	regeneration	4	0.000769971	GO:0031099
biological_process	antigen processing and presentation of peptide antigen	2	0.000384986	GO:0048002
biological_process	negative regulation of hormone metabolic process	2	0.000384986	GO:0032351
biological_process	antigen processing and presentation of peptide or polysaccharide antigen via MHC class II	1	0.000192493	GO:0002504
biological_process	positive regulation of molecular function	68	0.013089509	GO:0044093
biological_process	negative regulation of intracellular transport	2	0.000384986	GO:0032387
biological_process	response to oxygen levels	2	0.000384986	GO:0070482
biological_process	positive regulation of synapse assembly	1	0.000192493	GO:0051965
biological_process	microtubule organizing center organization	5	0.000962464	GO:0031023
biological_process	intracellular transport	74	0.014244466	GO:0046907
biological_process	RNA localization	4	0.000769971	GO:0006403
biological_process	cellular component macromolecule biosynthetic process	9	0.001732435	GO:0070589
biological_process	response to oxygen-containing compound	19	0.003657363	GO:1901700
biological_process	heme metabolic process	4	0.000769971	GO:0042168
biological_process	negative regulation of macromolecule metabolic process	33	0.006352262	GO:0010605
biological_process	proximal convoluted tubule development	1	0.000192493	GO:0072019
biological_process	negative regulation of organelle organization	10	0.001924928	GO:0010639
biological_process	cell migration	20	0.003849856	GO:0016477
biological_process	organelle localization	14	0.002694899	GO:0051640
biological_process	fatty acid derivative metabolic process	2	0.000384986	GO:1901568
biological_process	vitamin transport	1	0.000192493	GO:0051180
biological_process	imaginal disc-derived wing vein morphogenesis	2	0.000384986	GO:0008586
biological_process	regulation of organelle organization	23	0.004427334	GO:0033043
biological_process	pigment granule transport	1	0.000192493	GO:0051904
biological_process	tissue morphogenesis	22	0.004234841	GO:0048729
biological_process	positive regulation of nervous system development	1	0.000192493	GO:0051962
biological_process	microtubule-based process	94	0.018094321	GO:0007017
biological_process	regulation of peptide hormone secretion	2	0.000384986	GO:0090276
biological_process	single organism cell adhesion	8	0.001539942	GO:0098602
biological_process	digestive tract development	2	0.000384986	GO:0048565
biological_process	positive regulation of locomotion	2	0.000384986	GO:0040017
biological_process	ion transport	242	0.046583253	GO:0006811
biological_process	leukocyte mediated immunity	3	0.000577478	GO:0002443
biological_process	regulation of hemocyte proliferation	1	0.000192493	GO:0035206
biological_process	positive regulation of cell cycle process	4	0.000769971	GO:0090068
biological_process	cellular aromatic compound metabolic process	1024	0.197112608	GO:0006725
biological_process	ribosomal protein import into nucleus	1	0.000192493	GO:0006610
biological_process	organic substance catabolic process	448	0.086236766	GO:1901575
biological_process	negative regulation of cell growth	2	0.000384986	GO:0030308
biological_process	regulation of transmembrane transport	9	0.001732435	GO:0034762
biological_process	heterocycle metabolic process	1008	0.194032724	GO:0046483
biological_process	ossification	4	0.000769971	GO:0001503
biological_process	subthalamus development	1	0.000192493	GO:0021539
biological_process	hair follicle cell proliferation	1	0.000192493	GO:0071335
biological_process	regulation of reproductive process	3	0.000577478	GO:2000241
biological_process	positive regulation of transport	4	0.000769971	GO:0051050
biological_process	cellular macromolecule localization	59	0.011357074	GO:0070727
biological_process	regulation of translational fidelity	1	0.000192493	GO:0006450
biological_process	learning or memory	6	0.001154957	GO:0007611
biological_process	organ development	112	0.021559192	GO:0048513
biological_process	organelle fission	38	0.007314726	GO:0048285
biological_process	regulation of multicellular organism growth	1	0.000192493	GO:0040014
biological_process	imaginal disc fusion, thorax closure	1	0.000192493	GO:0046529
biological_process	spectrosome organization	1	0.000192493	GO:0030721
biological_process	riboflavin metabolic process	2	0.000384986	GO:0006771
biological_process	cytoplasm organization	2	0.000384986	GO:0007028
biological_process	endoplasmic reticulum organization	2	0.000384986	GO:0007029
biological_process	gene silencing	3	0.000577478	GO:0016458
biological_process	regulation of protein complex assembly	10	0.001924928	GO:0043254
biological_process	regulation of ion homeostasis	2	0.000384986	GO:2000021
biological_process	appendage development	23	0.004427334	GO:0048736
biological_process	outflow tract morphogenesis	1	0.000192493	GO:0003151
biological_process	organelle organization	173	0.033301251	GO:0006996
biological_process	response to extracellular stimulus	6	0.001154957	GO:0009991
biological_process	negative regulation of cellular process	96	0.018479307	GO:0048523
biological_process	negative regulation of cell junction assembly	1	0.000192493	GO:1901889
biological_process	lymphangiogenesis	1	0.000192493	GO:0001946
biological_process	forebrain development	9	0.001732435	GO:0030900
biological_process	Kupffer's vesicle development	1	0.000192493	GO:0070121
biological_process	leukocyte proliferation	1	0.000192493	GO:0070661
biological_process	interaction with host	1	0.000192493	GO:0051701
biological_process	negative regulation of signaling	18	0.00346487	GO:0023057
biological_process	negative regulation of nervous system development	1	0.000192493	GO:0051961
biological_process	positive regulation of multicellular organism growth	1	0.000192493	GO:0040018
biological_process	negative regulation of sequestering of calcium ion	2	0.000384986	GO:0051283
biological_process	regulation of response to alcohol	1	0.000192493	GO:1901419
biological_process	post-embryonic organ development	14	0.002694899	GO:0048569
biological_process	chemosensory behavior	4	0.000769971	GO:0007635
biological_process	multi-organism intracellular transport	1	0.000192493	GO:1902583
biological_process	regulation of cellular metabolic process	371	0.071414822	GO:0031323
biological_process	muscle structure development	6	0.001154957	GO:0061061
biological_process	regulation of synapse organization	5	0.000962464	GO:0050807
biological_process	gravitaxis	3	0.000577478	GO:0042332
biological_process	amide transport	2	0.000384986	GO:0042886
biological_process	regulation of immune effector process	2	0.000384986	GO:0002697
biological_process	positive regulation of organelle organization	3	0.000577478	GO:0010638
biological_process	locomotory behavior	2	0.000384986	GO:0007626
biological_process	G1 phase	1	0.000192493	GO:0051318
biological_process	rRNA transport	1	0.000192493	GO:0051029
biological_process	regulation of chromosome segregation	1	0.000192493	GO:0051983
biological_process	cellular potassium ion transport	18	0.00346487	GO:0071804
biological_process	single-organism carbohydrate metabolic process	139	0.026756497	GO:0044723
biological_process	glycosyl compound metabolic process	301	0.057940327	GO:1901657
biological_process	positive regulation of cell proliferation	7	0.001347449	GO:0008284
biological_process	regulation of circadian rhythm	2	0.000384986	GO:0042752
biological_process	tissue migration	4	0.000769971	GO:0090130
biological_process	drug metabolic process	5	0.000962464	GO:0017144
biological_process	regulation of cellular response to growth factor stimulus	3	0.000577478	GO:0090287
biological_process	regulation of cell adhesion	5	0.000962464	GO:0030155
biological_process	gamete generation	32	0.006159769	GO:0007276
biological_process	multicellular organismal reproductive behavior	3	0.000577478	GO:0033057
biological_process	regulation of developmental process	41	0.007892204	GO:0050793
biological_process	response to heat	9	0.001732435	GO:0009408
biological_process	regulation of ovulation	1	0.000192493	GO:0060278
biological_process	behavioral defense response	1	0.000192493	GO:0002209
biological_process	thermosensory behavior	1	0.000192493	GO:0040040
biological_process	oxidation-reduction process	318	0.061212705	GO:0055114
biological_process	vesicle organization	2	0.000384986	GO:0016050
biological_process	inner ear development	6	0.001154957	GO:0048839
biological_process	cerebellar cortex formation	2	0.000384986	GO:0021697
biological_process	cellular component maintenance	2	0.000384986	GO:0043954
biological_process	isotype switching	1	0.000192493	GO:0045190
biological_process	selenium compound metabolic process	1	0.000192493	GO:0001887
biological_process	cellular component disassembly	13	0.002502406	GO:0022411
biological_process	cellular pigmentation	2	0.000384986	GO:0033059
biological_process	negative regulation of male pigmentation	1	0.000192493	GO:0048092
biological_process	response to gravity	4	0.000769971	GO:0009629
biological_process	spinal cord development	1	0.000192493	GO:0021510
biological_process	anatomical structure maturation	1	0.000192493	GO:0071695
biological_process	somatic diversification of immunoglobulins	2	0.000384986	GO:0016445
biological_process	regulation of behavior	2	0.000384986	GO:0050795
biological_process	viral process	9	0.001732435	GO:0016032
biological_process	nurse cell apoptotic process	1	0.000192493	GO:0045476
biological_process	histone modification	22	0.004234841	GO:0016570
biological_process	positive regulation of growth	5	0.000962464	GO:0045927
biological_process	imaginal disc fusion	1	0.000192493	GO:0046528
biological_process	synaptic growth at neuromuscular junction	4	0.000769971	GO:0051124
biological_process	regulation of cellular component biogenesis	18	0.00346487	GO:0044087
biological_process	cellular process involved in reproduction in multicellular organism	22	0.004234841	GO:0022412
biological_process	negative regulation of developmental pigmentation	1	0.000192493	GO:0048086
biological_process	negative regulation of homeostatic process	1	0.000192493	GO:0032845
biological_process	neurotransmitter transport	11	0.002117421	GO:0006836
biological_process	generation of precursor metabolites and energy	109	0.020981713	GO:0006091
biological_process	cartilage development involved in endochondral bone morphogenesis	2	0.000384986	GO:0060351
biological_process	inositol phosphate metabolic process	1	0.000192493	GO:0043647
biological_process	multicellular organismal homeostasis	2	0.000384986	GO:0048871
biological_process	multi-organism transport	1	0.000192493	GO:0044766
biological_process	fertilization	2	0.000384986	GO:0009566
biological_process	regulation of tube length, open tracheal system	1	0.000192493	GO:0035159
biological_process	vitamin biosynthetic process	12	0.002309913	GO:0009110
biological_process	regulation of cell cycle	39	0.007507218	GO:0051726
biological_process	cellular response to endogenous stimulus	36	0.00692974	GO:0071495
biological_process	cell growth	15	0.002887392	GO:0016049
biological_process	positive regulation of cellular metabolic process	40	0.007699711	GO:0031325
biological_process	organelle assembly	25	0.00481232	GO:0070925
biological_process	shoot system development	1	0.000192493	GO:0048367
biological_process	negative regulation of peptide hormone secretion	1	0.000192493	GO:0090278
biological_process	translational initiation	36	0.00692974	GO:0006413
biological_process	cell development	68	0.013089509	GO:0048468
biological_process	somite development	2	0.000384986	GO:0061053
biological_process	defense response to other organism	5	0.000962464	GO:0098542
biological_process	response to protozoan	1	0.000192493	GO:0001562
biological_process	single-organism behavior	11	0.002117421	GO:0044708
biological_process	retina development in camera-type eye	4	0.000769971	GO:0060041
biological_process	positive regulation of biological process	84	0.016169394	GO:0048518
biological_process	cerebellum morphogenesis	2	0.000384986	GO:0021587
biological_process	lymphocyte migration	1	0.000192493	GO:0072676
biological_process	liver development	2	0.000384986	GO:0001889
biological_process	regulation of developmental pigmentation	1	0.000192493	GO:0048070
biological_process	positive regulation of lipid metabolic process	2	0.000384986	GO:0045834
biological_process	regulation of cell shape	2	0.000384986	GO:0008360
biological_process	behavioral fear response	1	0.000192493	GO:0001662
biological_process	regulation of nitrogen compound metabolic process	269	0.051780558	GO:0051171
biological_process	negative regulation of cell cycle	5	0.000962464	GO:0045786
biological_process	head morphogenesis	1	0.000192493	GO:0060323
biological_process	phosphorus metabolic process	839	0.161501444	GO:0006793
biological_process	ethanolamine-containing compound metabolic process	1	0.000192493	GO:0042439
biological_process	plasma membrane organization	1	0.000192493	GO:0007009
biological_process	regulation of vesicle-mediated transport	5	0.000962464	GO:0060627
biological_process	cellular nitrogen compound metabolic process	1012	0.194802695	GO:0034641
biological_process	visual behavior	1	0.000192493	GO:0007632
biological_process	brainstem development	1	0.000192493	GO:0003360
biological_process	negative regulation of cell division	2	0.000384986	GO:0051782
biological_process	type 2 immune response	1	0.000192493	GO:0042092
biological_process	response to fungus	1	0.000192493	GO:0009620
biological_process	bone development	4	0.000769971	GO:0060348
biological_process	regulation of neurotransmitter levels	5	0.000962464	GO:0001505
biological_process	positive regulation of protein complex assembly	3	0.000577478	GO:0031334
biological_process	positive regulation of transporter activity	2	0.000384986	GO:0032411
biological_process	foregut morphogenesis	2	0.000384986	GO:0007440
biological_process	membrane raft organization	1	0.000192493	GO:0031579
biological_process	positive regulation of cell motility	2	0.000384986	GO:2000147
biological_process	thyroid hormone metabolic process	1	0.000192493	GO:0042403
biological_process	carbohydrate metabolic process	220	0.042348412	GO:0005975
biological_process	cellular developmental process	114	0.021944177	GO:0048869
biological_process	regulation of male pigmentation	1	0.000192493	GO:0048088
biological_process	cell activation	8	0.001539942	GO:0001775
biological_process	cellular response to extracellular stimulus	6	0.001154957	GO:0031668
biological_process	antimicrobial humoral response	3	0.000577478	GO:0019730
biological_process	cerebellar cortex development	2	0.000384986	GO:0021695
biological_process	negative regulation of protein complex assembly	5	0.000962464	GO:0031333
biological_process	coagulation	8	0.001539942	GO:0050817
biological_process	midbrain development	1	0.000192493	GO:0030901
biological_process	gland morphogenesis	1	0.000192493	GO:0022612
biological_process	regulation of body fluid levels	9	0.001732435	GO:0050878
biological_process	face development	1	0.000192493	GO:0060324
biological_process	regulation of immune response	6	0.001154957	GO:0050776
biological_process	regulation of cell differentiation	29	0.005582291	GO:0045595
biological_process	cerebellar Purkinje cell layer development	2	0.000384986	GO:0021680
biological_process	pallium development	1	0.000192493	GO:0021543
biological_process	regulation of localization	41	0.007892204	GO:0032879
biological_process	olfactory lobe development	1	0.000192493	GO:0021988
biological_process	somatic diversification of immune receptors via somatic mutation	1	0.000192493	GO:0002566
biological_process	developmental growth involved in morphogenesis	9	0.001732435	GO:0060560
biological_process	positive regulation of biosynthetic process	21	0.004042348	GO:0009891
biological_process	cell wall macromolecule metabolic process	34	0.006544755	GO:0044036
biological_process	regulation of growth	15	0.002887392	GO:0040008
biological_process	regulation of pole plasm oskar mRNA localization	1	0.000192493	GO:0007317
biological_process	positive regulation of endocytosis	1	0.000192493	GO:0045807
biological_process	regulation of cell projection assembly	3	0.000577478	GO:0060491
biological_process	negative regulation of immune system process	1	0.000192493	GO:0002683
biological_process	regulation of establishment of protein localization	3	0.000577478	GO:0070201
biological_process	regulation of lipopolysaccharide-mediated signaling pathway	1	0.000192493	GO:0031664
biological_process	response to external biotic stimulus	9	0.001732435	GO:0043207
biological_process	hydrogen peroxide catabolic process	1	0.000192493	GO:0042744
biological_process	regulation of chemotaxis	2	0.000384986	GO:0050920
biological_process	multicellular organism growth	4	0.000769971	GO:0035264
biological_process	negative regulation of growth	4	0.000769971	GO:0045926
biological_process	system process	36	0.00692974	GO:0003008
biological_process	cardiac chamber development	1	0.000192493	GO:0003205
biological_process	regulation of cell junction assembly	1	0.000192493	GO:1901888
biological_process	lipid transport	11	0.002117421	GO:0006869
biological_process	anatomical structure morphogenesis	91	0.017516843	GO:0009653
biological_process	cellular response to stress	71	0.013666987	GO:0033554
biological_process	insulin secretion	2	0.000384986	GO:0030073
biological_process	transport	615	0.118383061	GO:0006810
biological_process	sensory organ development	31	0.005967276	GO:0007423
biological_process	cerebral cortex development	1	0.000192493	GO:0021987
biological_process	negative regulation of telomere maintenance	1	0.000192493	GO:0032205
biological_process	hair follicle development	1	0.000192493	GO:0001942
biological_process	negative regulation of reproductive process	1	0.000192493	GO:2000242
biological_process	positive regulation of developmental process	9	0.001732435	GO:0051094
biological_process	establishment of protein localization to mitochondrial membrane	1	0.000192493	GO:0090151
biological_process	regulation of cell death	21	0.004042348	GO:0010941
biological_process	phyllome development	1	0.000192493	GO:0048827
biological_process	negative regulation of cell projection organization	2	0.000384986	GO:0031345
biological_process	apoptotic process involved in development	1	0.000192493	GO:1902742
biological_process	sex-specific pigmentation	1	0.000192493	GO:0048071
biological_process	innate immune response	9	0.001732435	GO:0045087
biological_process	cellular response to biotic stimulus	2	0.000384986	GO:0071216
biological_process	viral gene expression	4	0.000769971	GO:0019080
biological_process	establishment of RNA localization	3	0.000577478	GO:0051236
biological_process	carbohydrate derivative transport	5	0.000962464	GO:1901264
biological_process	activation of innate immune response	3	0.000577478	GO:0002218
biological_process	single-organism biosynthetic process	235	0.045235804	GO:0044711
biological_process	anatomical structure formation involved in morphogenesis	31	0.005967276	GO:0048646
biological_process	carbohydrate derivative metabolic process	428	0.08238691	GO:1901135
biological_process	positive regulation of cell cycle	2	0.000384986	GO:0045787
biological_process	negative regulation of synapse assembly	1	0.000192493	GO:0051964
biological_process	regulation of actin filament-based process	11	0.002117421	GO:0032970
biological_process	organonitrogen compound metabolic process	799	0.153801732	GO:1901564
biological_process	positive regulation of lipid storage	1	0.000192493	GO:0010884
biological_process	negative regulation of cell cycle process	7	0.001347449	GO:0010948
biological_process	digestive tract morphogenesis	2	0.000384986	GO:0048546
biological_process	ovulation	1	0.000192493	GO:0030728
biological_process	oocyte differentiation	2	0.000384986	GO:0009994
biological_process	negative regulation of protein transport	3	0.000577478	GO:0051224
biological_process	cytokine production	3	0.000577478	GO:0001816
biological_process	regulation of synaptic transmission	1	0.000192493	GO:0050804
biological_process	negative regulation of hormone secretion	1	0.000192493	GO:0046888
biological_process	regulation of receptor activity	1	0.000192493	GO:0010469
biological_process	tissue death	2	0.000384986	GO:0016271
biological_process	cobalamin metabolic process	1	0.000192493	GO:0009235
biological_process	negative regulation of locomotion	3	0.000577478	GO:0040013
biological_process	positive regulation of multi-organism process	2	0.000384986	GO:0043902
biological_process	negative regulation of metabolic process	41	0.007892204	GO:0009892
biological_process	protein demethylation	1	0.000192493	GO:0006482
biological_process	nicotinamide metabolic process	7	0.001347449	GO:0006769
biological_process	aggressive behavior	2	0.000384986	GO:0002118
biological_process	establishment of organelle localization	10	0.001924928	GO:0051656
biological_process	cellular aldehyde metabolic process	10	0.001924928	GO:0006081
biological_process	negative regulation of signal transduction	18	0.00346487	GO:0009968
biological_process	entrainment of circadian clock	1	0.000192493	GO:0009649
biological_process	positive regulation of catabolic process	3	0.000577478	GO:0009896
biological_process	multicellular organismal response to stress	1	0.000192493	GO:0033555
biological_process	regulation of response to stimulus	117	0.022521655	GO:0048583
biological_process	vacuole organization	3	0.000577478	GO:0007033
biological_process	regulation of cell activation	4	0.000769971	GO:0050865
biological_process	retina morphogenesis in camera-type eye	1	0.000192493	GO:0060042
biological_process	regulation of binding	4	0.000769971	GO:0051098
biological_process	cellular component movement	72	0.01385948	GO:0006928
biological_process	filamentous growth of a population of unicellular organisms	1	0.000192493	GO:0044182
biological_process	regulation of tube architecture, open tracheal system	1	0.000192493	GO:0035152
biological_process	cellular catabolic process	387	0.074494706	GO:0044248
biological_process	aminoglycoside antibiotic biosynthetic process	5	0.000962464	GO:0030648
biological_process	ocellus pigmentation	1	0.000192493	GO:0033060
biological_process	secretion by tissue	1	0.000192493	GO:0032941
biological_process	growth of a germarium-derived egg chamber	1	0.000192493	GO:0007295
biological_process	positive regulation of cellular component movement	2	0.000384986	GO:0051272
biological_process	homeostatic process	64	0.012319538	GO:0042592
biological_process	otolith development	1	0.000192493	GO:0048840
biological_process	signal transduction by phosphorylation	20	0.003849856	GO:0023014
biological_process	regulation of oocyte development	1	0.000192493	GO:0060281
biological_process	anaphase	1	0.000192493	GO:0051322
biological_process	cell projection organization	53	0.010202117	GO:0030030
biological_process	cellular response to abiotic stimulus	6	0.001154957	GO:0071214
biological_process	negative regulation of viral entry into host cell	1	0.000192493	GO:0046597
biological_process	protein complex biogenesis	88	0.016939365	GO:0070271
biological_process	negative regulation of protein secretion	1	0.000192493	GO:0050709
biological_process	cell death	41	0.007892204	GO:0008219
biological_process	response to inorganic substance	10	0.001924928	GO:0010035
biological_process	positive regulation of cell growth	3	0.000577478	GO:0030307
biological_process	negative regulation of biosynthetic process	22	0.004234841	GO:0009890
biological_process	multi-organism reproductive behavior	3	0.000577478	GO:0044705
biological_process	regulation of leukocyte migration	1	0.000192493	GO:0002685
biological_process	somitogenesis	2	0.000384986	GO:0001756
biological_process	blood vessel morphogenesis	4	0.000769971	GO:0048514
biological_process	cellular hormone metabolic process	2	0.000384986	GO:0034754
biological_process	lipid metabolic process	132	0.025409047	GO:0006629
biological_process	ensheathment of neurons	1	0.000192493	GO:0007272
biological_process	cellular biosynthetic process	701	0.13493744	GO:0044249
biological_process	embryonic organ development	8	0.001539942	GO:0048568
biological_process	somatic diversification of immune receptors via germline recombination within a single locus	2	0.000384986	GO:0002562
biological_process	cellular homeostasis	50	0.009624639	GO:0019725
biological_process	cellularization	2	0.000384986	GO:0007349
biological_process	detection of external stimulus	8	0.001539942	GO:0009581
biological_process	negative regulation of transport	6	0.001154957	GO:0051051
biological_process	substantia nigra development	1	0.000192493	GO:0021762
biological_process	chemotaxis	17	0.003272377	GO:0006935
biological_process	cellular carbohydrate biosynthetic process	8	0.001539942	GO:0034637
biological_process	symbiosis, encompassing mutualism through parasitism	9	0.001732435	GO:0044403
biological_process	regulation of symbiosis, encompassing mutualism through parasitism	4	0.000769971	GO:0043903
biological_process	fluid transport	1	0.000192493	GO:0042044
biological_process	regulation of ligand-dependent nuclear receptor transcription coactivator activity	1	0.000192493	GO:2000325
biological_process	transport of virus	1	0.000192493	GO:0046794
biological_process	organic substance transport	160	0.030798845	GO:0071702
biological_process	face morphogenesis	1	0.000192493	GO:0060325
biological_process	temperature compensation of the circadian clock	1	0.000192493	GO:0010378
biological_process	response to bacterium	4	0.000769971	GO:0009617
biological_process	imaginal disc development	14	0.002694899	GO:0007444
biological_process	oocyte construction	2	0.000384986	GO:0007308
biological_process	cellular component assembly	138	0.026564004	GO:0022607
biological_process	lymphocyte activation	7	0.001347449	GO:0046649
biological_process	regulation of lipid storage	1	0.000192493	GO:0010883
biological_process	organic acid metabolic process	399	0.07680462	GO:0006082
biological_process	ovarian follicle development	1	0.000192493	GO:0001541
biological_process	cell communication	517	0.099518768	GO:0007154
biological_process	synapse organization	8	0.001539942	GO:0050808
biological_process	substrate adhesion-dependent cell spreading	1	0.000192493	GO:0034446
biological_process	positive regulation of multicellular organismal process	5	0.000962464	GO:0051240
biological_process	positive regulation of cytokine production	2	0.000384986	GO:0001819
biological_process	spermatid differentiation	5	0.000962464	GO:0048515
biological_process	response to organic substance	51	0.009817132	GO:0010033
biological_process	thermotaxis	1	0.000192493	GO:0043052
biological_process	response to transition metal nanoparticle	1	0.000192493	GO:1990267
biological_process	regulation of cellular process	883	0.169971126	GO:0050794
biological_process	organ growth	1	0.000192493	GO:0035265
biological_process	response to radiation	18	0.00346487	GO:0009314
biological_process	neuromuscular synaptic transmission	1	0.000192493	GO:0007274
biological_process	positive regulation of response to external stimulus	1	0.000192493	GO:0032103
biological_process	regulation of catabolic process	78	0.015014437	GO:0009894
biological_process	secretion	14	0.002694899	GO:0046903
biological_process	regulation of cellular response to stress	6	0.001154957	GO:0080135
biological_process	determination of adult lifespan	2	0.000384986	GO:0008340
biological_process	positive regulation of cellular component biogenesis	1	0.000192493	GO:0044089
biological_process	positive regulation of cell projection organization	1	0.000192493	GO:0031346
biological_process	response to acid	1	0.000192493	GO:0001101
biological_process	positive regulation of response to alcohol	1	0.000192493	GO:1901421
biological_process	molting cycle	2	0.000384986	GO:0042303
biological_process	single-organism membrane fusion	1	0.000192493	GO:0044801
biological_process	chromosome condensation	7	0.001347449	GO:0030261
biological_process	negative regulation of cellular response to growth factor stimulus	2	0.000384986	GO:0090288
biological_process	gas transport	2	0.000384986	GO:0015669
biological_process	nucleobase-containing compound metabolic process	953	0.183445621	GO:0006139
biological_process	tube morphogenesis	3	0.000577478	GO:0035239
biological_process	meiotic cytokinesis	1	0.000192493	GO:0033206
biological_process	regulation of cellular component movement	9	0.001732435	GO:0051270
biological_process	molting cycle process	2	0.000384986	GO:0022404
biological_process	regulation of vascular permeability	1	0.000192493	GO:0043114
biological_process	cardiac conduction system development	1	0.000192493	GO:0003161
biological_process	response to nitrogen compound	3	0.000577478	GO:1901698
biological_process	hemocyte proliferation	1	0.000192493	GO:0035172
biological_process	gland development	5	0.000962464	GO:0048732
biological_process	response to osmotic stress	3	0.000577478	GO:0006970
biological_process	angiogenesis	2	0.000384986	GO:0001525
biological_process	response to fibroblast growth factor	3	0.000577478	GO:0071774
biological_process	negative regulation of cytokine production	2	0.000384986	GO:0001818
biological_process	response to hypoxia	2	0.000384986	GO:0001666
biological_process	reproductive behavior	3	0.000577478	GO:0019098
biological_process	positive regulation of toll-like receptor signaling pathway	1	0.000192493	GO:0034123
biological_process	negative regulation of cellular component movement	2	0.000384986	GO:0051271
biological_process	regulation of sequestering of calcium ion	2	0.000384986	GO:0051282
biological_process	single organismal cell-cell adhesion	8	0.001539942	GO:0016337
biological_process	detection of abiotic stimulus	8	0.001539942	GO:0009582
biological_process	regulation of response to external stimulus	8	0.001539942	GO:0032101
biological_process	cerebellum development	3	0.000577478	GO:0021549
biological_process	regulation of microtubule-based process	2	0.000384986	GO:0032886
biological_process	cell-cell adhesion	15	0.002887392	GO:0098609
biological_process	negative regulation of cell proliferation	6	0.001154957	GO:0008285
biological_process	cofactor metabolic process	102	0.019634264	GO:0051186
biological_process	regulation of RNA stability	1	0.000192493	GO:0043487
biological_process	regulation of protein complex disassembly	8	0.001539942	GO:0043244
biological_process	establishment of spindle localization	4	0.000769971	GO:0051293
biological_process	cytokine production involved in immune response	1	0.000192493	GO:0002367
biological_process	regulation of hormone secretion	2	0.000384986	GO:0046883
biological_process	regulation of cell division	14	0.002694899	GO:0051302
biological_process	organic acid transport	19	0.003657363	GO:0015849
biological_process	negative regulation of leukocyte migration	1	0.000192493	GO:0002686
biological_process	nucleus organization	2	0.000384986	GO:0006997
biological_process	regulation of developmental growth	6	0.001154957	GO:0048638
biological_process	post-embryonic development	23	0.004427334	GO:0009791
biological_process	development of primary sexual characteristics	5	0.000962464	GO:0045137
biological_process	vitamin B6 metabolic process	2	0.000384986	GO:0042816
biological_process	regulation of cell proliferation	17	0.003272377	GO:0042127
biological_process	cell aging	1	0.000192493	GO:0007569
biological_process	embryonic morphogenesis	19	0.003657363	GO:0048598
biological_process	positive regulation of embryonic development	1	0.000192493	GO:0040019
biological_process	meiotic gene conversion	1	0.000192493	GO:0006311
biological_process	regulation of biosynthetic process	240	0.046198268	GO:0009889
biological_process	demethylation	1	0.000192493	GO:0070988
biological_process	virion assembly	1	0.000192493	GO:0019068
biological_process	oocyte axis specification	1	0.000192493	GO:0007309
biological_process	cellular response to external stimulus	6	0.001154957	GO:0071496
biological_process	aging	4	0.000769971	GO:0007568
biological_process	regulation of toll-like receptor signaling pathway	1	0.000192493	GO:0034121
biological_process	response to drug	6	0.001154957	GO:0042493
biological_process	response to wounding	19	0.003657363	GO:0009611
biological_process	protein import	8	0.001539942	GO:0017038
biological_process	lung development	1	0.000192493	GO:0030324
biological_process	regulation of metabolic process	419	0.080654475	GO:0019222
biological_process	positive regulation of synaptic transmission	1	0.000192493	GO:0050806
biological_process	response to hormone	26	0.005004812	GO:0009725
biological_process	digestion	7	0.001347449	GO:0007586
biological_process	appendage morphogenesis	19	0.003657363	GO:0035107
biological_process	ovulation cycle	1	0.000192493	GO:0042698
biological_process	positive regulation of peptide hormone secretion	1	0.000192493	GO:0090277
biological_process	positive regulation of nitrogen compound metabolic process	22	0.004234841	GO:0051173
biological_process	cofactor transport	1	0.000192493	GO:0051181
biological_process	single-organism catabolic process	354	0.068142445	GO:0044712
biological_process	muscle cell proliferation	1	0.000192493	GO:0033002
biological_process	disaccharide metabolic process	28	0.005389798	GO:0005984
biological_process	negative regulation of cell adhesion	2	0.000384986	GO:0007162
biological_process	social behavior	1	0.000192493	GO:0035176
biological_process	maintenance of location in cell	6	0.001154957	GO:0051651
biological_process	one-carbon metabolic process	11	0.002117421	GO:0006730
biological_process	cilium or flagellum-dependent cell motility	1	0.000192493	GO:0001539
biological_process	regulation of response to stress	11	0.002117421	GO:0080134
biological_process	mitochondrial membrane organization	1	0.000192493	GO:0007006
biological_process	regulation of cell communication by electrical coupling involved in cardiac conduction	1	0.000192493	GO:1901844
biological_process	reactive oxygen species metabolic process	7	0.001347449	GO:0072593
biological_process	gonad development	5	0.000962464	GO:0008406
biological_process	regulation of catalytic activity	128	0.024639076	GO:0050790
biological_process	cellular component morphogenesis	47	0.009047161	GO:0032989
biological_process	transmembrane transport	236	0.045428296	GO:0055085
biological_process	lymph vessel morphogenesis	1	0.000192493	GO:0036303
biological_process	response to mechanical stimulus	2	0.000384986	GO:0009612
biological_process	craniofacial suture morphogenesis	1	0.000192493	GO:0097094
biological_process	macromolecule metabolic process	1393	0.268142445	GO:0043170
biological_process	secondary metabolic process	3	0.000577478	GO:0019748
biological_process	positive regulation of hormone secretion	1	0.000192493	GO:0046887
biological_process	photoreceptor cell outer segment organization	1	0.000192493	GO:0035845
biological_process	cellular macromolecule metabolic process	1200	0.230991338	GO:0044260
biological_process	electron transport chain	25	0.00481232	GO:0022900
biological_process	negative regulation of cell communication	19	0.003657363	GO:0010648
biological_process	tissue remodeling	1	0.000192493	GO:0048771
biological_process	response to starvation	5	0.000962464	GO:0042594
biological_process	leukocyte chemotaxis	1	0.000192493	GO:0030595
biological_process	negative regulation of catabolic process	5	0.000962464	GO:0009895
biological_process	regulation of membrane potential	4	0.000769971	GO:0042391
biological_process	nephron development	1	0.000192493	GO:0072006
biological_process	negative regulation of response to stimulus	19	0.003657363	GO:0048585
biological_process	immunoglobulin production	2	0.000384986	GO:0002377
biological_process	positive regulation of immune system process	9	0.001732435	GO:0002684
biological_process	heart development	11	0.002117421	GO:0007507
biological_process	membrane docking	1	0.000192493	GO:0022406
biological_process	sexual reproduction	37	0.007122233	GO:0019953
biological_process	interphase	1	0.000192493	GO:0051325
biological_process	regulation of cell growth	8	0.001539942	GO:0001558
biological_process	metamorphosis	18	0.00346487	GO:0007552
biological_process	embryo development	35	0.006737247	GO:0009790
biological_process	regulation of cell communication	115	0.02213667	GO:0010646
biological_process	forebrain morphogenesis	1	0.000192493	GO:0048853
biological_process	negative regulation of lipid metabolic process	5	0.000962464	GO:0045833
biological_process	regulation of primary metabolic process	380	0.073147257	GO:0080090
biological_process	release of sequestered calcium ion into cytosol	2	0.000384986	GO:0051209
biological_process	regulation of meiotic cell cycle	1	0.000192493	GO:0051445
biological_process	sulfur compound transport	2	0.000384986	GO:0072348
biological_process	regulation of anatomical structure morphogenesis	16	0.003079885	GO:0022603
biological_process	protein oxidation	1	0.000192493	GO:0018158
biological_process	adaptive immune response	3	0.000577478	GO:0002250
biological_process	semicircular canal development	1	0.000192493	GO:0060872
biological_process	regulation of anatomical structure size	15	0.002887392	GO:0090066
biological_process	genitalia development	1	0.000192493	GO:0048806
biological_process	localization within membrane	3	0.000577478	GO:0051668
biological_process	ovarian follicle cell development	4	0.000769971	GO:0030707
biological_process	grooming behavior	1	0.000192493	GO:0007625
biological_process	multicellular organismal development	203	0.039076035	GO:0007275
biological_process	negative regulation of vesicle fusion	1	0.000192493	GO:0031339
biological_process	ribonucleoprotein complex biogenesis	113	0.021751684	GO:0022613
biological_process	positive regulation of response to biotic stimulus	1	0.000192493	GO:0002833
biological_process	cardiac septum development	1	0.000192493	GO:0003279
biological_process	tissue development	49	0.009432146	GO:0009888
biological_process	response to toxic substance	1	0.000192493	GO:0009636
biological_process	developmental growth	20	0.003849856	GO:0048589
biological_process	germarium-derived oocyte fate determination	2	0.000384986	GO:0007294
biological_process	positive regulation of cell adhesion	2	0.000384986	GO:0045785
biological_process	brain development	26	0.005004812	GO:0007420
biological_process	carbohydrate transport	16	0.003079885	GO:0008643
biological_process	regulation of ubiquitin homeostasis	1	0.000192493	GO:0010993
biological_process	ventral spinal cord development	1	0.000192493	GO:0021517
biological_process	regulation of leukocyte activation	4	0.000769971	GO:0002694
biological_process	leukocyte activation involved in immune response	1	0.000192493	GO:0002366
biological_process	cerebellar cortex morphogenesis	2	0.000384986	GO:0021696
biological_process	ovulation cycle process	1	0.000192493	GO:0022602
biological_process	negative regulation of transporter activity	1	0.000192493	GO:0032410
