# Supplementary material for: Insights into Sexual Precocity of Female Oriental River Prawn Macrobrachium nipponense through Transcriptome Analysis
Source: PLoS One. 2016 Jun 9;11(6):e0157173. doi: 10.1371/journal.pone.0157173 (PMC4900531; doi:10.1371/journal.pone.0157173)
Supplement: S3 Table — (XLS) [file pone.0157173.s003.xls]

#Total seqs with COG/KOG/NOGs:3793
#Type	functional_categories	COG	KOG	NOG
INFORMATION STORAGE AND PROCESSING	[A] RNA processing and modification	26	173	0
INFORMATION STORAGE AND PROCESSING	[B] Chromatin structure and dynamics	54	67	0
INFORMATION STORAGE AND PROCESSING	[J] Translation, ribosomal structure and biogenesis	222	206	0
INFORMATION STORAGE AND PROCESSING	[K] Transcription	316	238	5
INFORMATION STORAGE AND PROCESSING	[L] Replication, recombination and repair	315	76	1
CELLULAR PROCESSES AND SIGNALING	[D] Cell cycle control, cell division, chromosome partitioning	87	96	0
CELLULAR PROCESSES AND SIGNALING	[M] Cell wall/membrane/envelope biogenesis	24	23	0
CELLULAR PROCESSES AND SIGNALING	[N] Cell motility	6	7	0
CELLULAR PROCESSES AND SIGNALING	[O] Posttranslational modification, protein turnover, chaperones	278	348	3
CELLULAR PROCESSES AND SIGNALING	[T] Signal transduction mechanisms	278	461	1
CELLULAR PROCESSES AND SIGNALING	[U] Intracellular trafficking, secretion, and vesicular transport	81	229	0
CELLULAR PROCESSES AND SIGNALING	[V] Defense mechanisms	11	21	0
CELLULAR PROCESSES AND SIGNALING	[W] Extracellular structures	0	22	0
CELLULAR PROCESSES AND SIGNALING	[Y] Nuclear structure	2	9	0
CELLULAR PROCESSES AND SIGNALING	[Z] Cytoskeleton	108	149	0
METABOLISM	[C] Energy production and conversion	137	163	0
METABOLISM	[E] Amino acid transport and metabolism	123	98	0
METABOLISM	[F] Nucleotide transport and metabolism	61	55	0
METABOLISM	[G] Carbohydrate transport and metabolism	89	109	1
METABOLISM	[H] Coenzyme transport and metabolism	51	38	0
METABOLISM	[I] Lipid transport and metabolism	92	96	0
METABOLISM	[P] Inorganic ion transport and metabolism	67	63	2
METABOLISM	[Q] Secondary metabolites biosynthesis, transport and catabolism	50	28	0
POORLY CHARACTERIZED	[R] General function prediction only	684	522	13
POORLY CHARACTERIZED	[S] Function unknown	65	257	33
