# Supplementary material for: Insights into Sexual Precocity of Female Oriental River Prawn Macrobrachium nipponense through Transcriptome Analysis
Source: PLoS One. 2016 Jun 9;11(6):e0157173. doi: 10.1371/journal.pone.0157173 (PMC4900531; doi:10.1371/journal.pone.0157173)
Supplement: S5 Table — (XLS) [file pone.0157173.s005.xls]

#Query	Ko id(Gene id)	Ko name(Gene name)	hyperlink	Paths
c34314_g1_i1	K14959	MLL4	http://www.genome.jp/dbget-bin/www_bget?ko:K14959	path:ko00310
c34917_g1_i1	K09228	KRAB	http://www.genome.jp/dbget-bin/www_bget?ko:K09228
c34024_g1_i1	K16502	CDHR2, PCDH24, PCLKC	http://www.genome.jp/dbget-bin/www_bget?ko:K16502
c34499_g1_i1	K08539	NR1I1, VDR	http://www.genome.jp/dbget-bin/www_bget?ko:K08539	path:ko04961;path:ko04978;path:ko05152
c34180_g1_i1	K12567	TTN	http://www.genome.jp/dbget-bin/www_bget?ko:K12567	path:ko05410;path:ko05414
c34311_g1_i1	K00134	GAPDH, gapA	http://www.genome.jp/dbget-bin/www_bget?ko:K00134	path:ko00010;path:ko00710;path:ko01100;path:ko01110;path:ko01120;path:ko01200;path:ko01230;path:ko04066;path:ko05010
c35057_g1_i1	K11141	ENPEP	http://www.genome.jp/dbget-bin/www_bget?ko:K11141	path:ko04614
c34383_g1_i1	K04280	GNRHR	http://www.genome.jp/dbget-bin/www_bget?ko:K04280	path:ko04080;path:ko04912
c34552_g1_i1	K04550	LRP1, CD91	http://www.genome.jp/dbget-bin/www_bget?ko:K04550	path:ko05010;path:ko05144
c34591_g1_i1	K05694	PTPRB, PTPB	http://www.genome.jp/dbget-bin/www_bget?ko:K05694	path:ko04520
c34212_g1_i1	K01594	CSAD	http://www.genome.jp/dbget-bin/www_bget?ko:K01594	path:ko00430;path:ko01100
c34639_g1_i1	K09186	MLL1	http://www.genome.jp/dbget-bin/www_bget?ko:K09186	path:ko00310;path:ko05202
c34248_g1_i1	K02947	RP-S10e, RPS10	http://www.genome.jp/dbget-bin/www_bget?ko:K02947	path:ko03010
c34747_g1_i1	K12047	MGAM	http://www.genome.jp/dbget-bin/www_bget?ko:K12047	path:ko00052;path:ko00500;path:ko01100;path:ko04973
c34596_g1_i1	K13403	MTHFD2	http://www.genome.jp/dbget-bin/www_bget?ko:K13403	path:ko00670;path:ko01100
c34601_g1_i1	K08203	SLC22A6, OAT1	http://www.genome.jp/dbget-bin/www_bget?ko:K08203
c34850_g1_i1	K17341	HMCN	http://www.genome.jp/dbget-bin/www_bget?ko:K17341
c34235_g1_i1	K02989	RP-S5e, RPS5	http://www.genome.jp/dbget-bin/www_bget?ko:K02989	path:ko03010
c34960_g1_i1	K03097	CSNK2A	http://www.genome.jp/dbget-bin/www_bget?ko:K03097	path:ko03008;path:ko04064;path:ko04310;path:ko04520;path:ko04530;path:ko04712;path:ko05162;path:ko05168;path:ko05169
c34048_g1_i1	K16502	CDHR2, PCDH24, PCLKC	http://www.genome.jp/dbget-bin/www_bget?ko:K16502
c34927_g1_i1	K14314	NUP210, GP210	http://www.genome.jp/dbget-bin/www_bget?ko:K14314	path:ko03013
c34475_g1_i1	K02149	ATPeVD, ATP6M	http://www.genome.jp/dbget-bin/www_bget?ko:K02149	path:ko00190;path:ko01100;path:ko04145;path:ko04721;path:ko04966;path:ko05110;path:ko05120;path:ko05323
c34256_g1_i1	K05011	CLCN2	http://www.genome.jp/dbget-bin/www_bget?ko:K05011	path:ko04978
c34501_g1_i1	K17781	TIM13	http://www.genome.jp/dbget-bin/www_bget?ko:K17781
c34598_g1_i1	K09228	KRAB	http://www.genome.jp/dbget-bin/www_bget?ko:K09228
c34656_g1_i1	K03300	TC.CITMHS	http://www.genome.jp/dbget-bin/www_bget?ko:K03300
c34415_g1_i1	K08076	E3.4.24.21	http://www.genome.jp/dbget-bin/www_bget?ko:K08076
c34162_g1_i1	K16197	YWHAB_Q_Z	http://www.genome.jp/dbget-bin/www_bget?ko:K16197	path:ko04110;path:ko04114;path:ko04151;path:ko04390;path:ko04391;path:ko05161;path:ko05169;path:ko05203
c34288_g1_i1	K04911	KCNH8	http://www.genome.jp/dbget-bin/www_bget?ko:K04911
c34769_g1_i1	K08518	STXBP5	http://www.genome.jp/dbget-bin/www_bget?ko:K08518
c34303_g1_i1	K02537	MAD2	http://www.genome.jp/dbget-bin/www_bget?ko:K02537	path:ko04110;path:ko04111;path:ko04113;path:ko04114;path:ko04914;path:ko05166
c34215_g1_i1	K15189	HEXIM1_2	http://www.genome.jp/dbget-bin/www_bget?ko:K15189
c34930_g1_i1	K11498	CENPE	http://www.genome.jp/dbget-bin/www_bget?ko:K11498
c34972_g1_i1	K14689	SLC30A2, ZNT2	http://www.genome.jp/dbget-bin/www_bget?ko:K14689
c34353_g1_i1	K02311	DFFB, DFF40	http://www.genome.jp/dbget-bin/www_bget?ko:K02311	path:ko04210
c34209_g1_i1	K05324	KCNQN	http://www.genome.jp/dbget-bin/www_bget?ko:K05324
c34153_g1_i1	K01572	E4.1.1.3B, oadB	http://www.genome.jp/dbget-bin/www_bget?ko:K01572	path:ko00620;path:ko01100
c34791_g1_i1	K04571	SSR4	http://www.genome.jp/dbget-bin/www_bget?ko:K04571	path:ko04141
c34197_g1_i1	K08504	BET1	http://www.genome.jp/dbget-bin/www_bget?ko:K08504	path:ko04130
c34322_g1_i1	K14305	NUP43	http://www.genome.jp/dbget-bin/www_bget?ko:K14305	path:ko03013
c34844_g1_i1	K08857	NEK	http://www.genome.jp/dbget-bin/www_bget?ko:K08857
c34309_g1_i1	K16743	ASPM, ASP	http://www.genome.jp/dbget-bin/www_bget?ko:K16743
c34394_g1_i1	K05122	ROR1, NTRKR1	http://www.genome.jp/dbget-bin/www_bget?ko:K05122
c34351_g1_i1	K01052	LIPA	http://www.genome.jp/dbget-bin/www_bget?ko:K01052	path:ko00100;path:ko04142
c34106_g1_i1	K10513	ZBTB41	http://www.genome.jp/dbget-bin/www_bget?ko:K10513
c34555_g1_i1	K08770	UBC	http://www.genome.jp/dbget-bin/www_bget?ko:K08770	path:ko03320
c34478_g1_i1	K10414	DYNC2H, DNCH2	http://www.genome.jp/dbget-bin/www_bget?ko:K10414	path:ko04145;path:ko04962;path:ko05132
c34658_g1_i1	K03006	RPB1, POLR2A	http://www.genome.jp/dbget-bin/www_bget?ko:K03006	path:ko00230;path:ko00240;path:ko01100;path:ko03020;path:ko05016;path:ko05168;path:ko05169
c34659_g1_i1	K02901	RP-L27e, RPL27	http://www.genome.jp/dbget-bin/www_bget?ko:K02901	path:ko03010
c34746_g1_i1	K10844	ERCC2, XPD	http://www.genome.jp/dbget-bin/www_bget?ko:K10844	path:ko03022;path:ko03420
c34032_g1_i1	K04911	KCNH8	http://www.genome.jp/dbget-bin/www_bget?ko:K04911
c34895_g1_i1	K09228	KRAB	http://www.genome.jp/dbget-bin/www_bget?ko:K09228
c35027_g1_i1	K06234	RAB23	http://www.genome.jp/dbget-bin/www_bget?ko:K06234	path:ko04340
c34467_g1_i1	K05273	GRGLCN	http://www.genome.jp/dbget-bin/www_bget?ko:K05273
c34258_g1_i1	K01469	E3.5.2.9	http://www.genome.jp/dbget-bin/www_bget?ko:K01469	path:ko00480
c34535_g1_i1	K09195	SP5	http://www.genome.jp/dbget-bin/www_bget?ko:K09195
c34696_g1_i1	K04550	LRP1, CD91	http://www.genome.jp/dbget-bin/www_bget?ko:K04550	path:ko05010;path:ko05144
c34921_g1_i1	K16474	IFT88	http://www.genome.jp/dbget-bin/www_bget?ko:K16474
c34891_g1_i1	K09223	GFI1	http://www.genome.jp/dbget-bin/www_bget?ko:K09223
c34515_g1_i1	K02978	RP-S27e, RPS27	http://www.genome.jp/dbget-bin/www_bget?ko:K02978	path:ko03010
c34821_g1_i1	K18061	SBF1_2, MTMR5_13	http://www.genome.jp/dbget-bin/www_bget?ko:K18061
c34337_g1_i1	K00416	QCR6, UQCRH	http://www.genome.jp/dbget-bin/www_bget?ko:K00416	path:ko00190;path:ko01100;path:ko04260;path:ko04932;path:ko05010;path:ko05012;path:ko05016
c34275_g1_i1	K12162	UFM1	http://www.genome.jp/dbget-bin/www_bget?ko:K12162
c34151_g1_i1	K01074	PPT	http://www.genome.jp/dbget-bin/www_bget?ko:K01074	path:ko00062;path:ko01100;path:ko01212;path:ko04142
c34876_g1_i1	K04984	TRPA1, ANKTM1	http://www.genome.jp/dbget-bin/www_bget?ko:K04984	path:ko04750
c34587_g1_i1	K04307	LGR8	http://www.genome.jp/dbget-bin/www_bget?ko:K04307	path:ko04080
c34811_g1_i1	K08270	DDIT4, REDD1	http://www.genome.jp/dbget-bin/www_bget?ko:K08270	path:ko04150;path:ko04151;path:ko05206
c34398_g1_i1	K12757	MYL12	http://www.genome.jp/dbget-bin/www_bget?ko:K12757	path:ko04510;path:ko04530;path:ko04611;path:ko04670;path:ko04810
c34434_g1_i1	K04255	OPN4, Rh2_7	http://www.genome.jp/dbget-bin/www_bget?ko:K04255
c34566_g1_i1	K04547	GNG13	http://www.genome.jp/dbget-bin/www_bget?ko:K04547	path:ko04014;path:ko04062;path:ko04151;path:ko04713;path:ko04723;path:ko04724;path:ko04725;path:ko04726;path:ko04727;path:ko04728;path:ko04742;path:ko04745;path:ko05032;path:ko05034
c34390_g1_i1	K05011	CLCN2	http://www.genome.jp/dbget-bin/www_bget?ko:K05011	path:ko04978
c56198_g1_i1	K08898	LMTK2	http://www.genome.jp/dbget-bin/www_bget?ko:K08898
c56509_g1_i1	K09188	MLL3	http://www.genome.jp/dbget-bin/www_bget?ko:K09188	path:ko00310
c56214_g1_i1	K02319	DPA, polB1	http://www.genome.jp/dbget-bin/www_bget?ko:K02319	path:ko00230;path:ko00240;path:ko01100
c56931_g1_i1	K09228	KRAB	http://www.genome.jp/dbget-bin/www_bget?ko:K09228
c56378_g1_i1	K09228	KRAB	http://www.genome.jp/dbget-bin/www_bget?ko:K09228
c56965_g1_i1	K05762	RDX	http://www.genome.jp/dbget-bin/www_bget?ko:K05762	path:ko04810;path:ko05205;path:ko05206
c56920_g1_i1	K05128	RYK	http://www.genome.jp/dbget-bin/www_bget?ko:K05128
c56510_g1_i1	K02085	APC	http://www.genome.jp/dbget-bin/www_bget?ko:K02085	path:ko04310;path:ko04390;path:ko04810;path:ko05166;path:ko05200;path:ko05206;path:ko05210;path:ko05213;path:ko05217
c56653_g1_i1	K00162	PDHB, pdhB	http://www.genome.jp/dbget-bin/www_bget?ko:K00162	path:ko00010;path:ko00020;path:ko00620;path:ko01100;path:ko01110;path:ko01120;path:ko01200;path:ko04066
c56687_g1_i1	K10380	ANK	http://www.genome.jp/dbget-bin/www_bget?ko:K10380	path:ko05205
c56422_g1_i1	K03323	SLC29A4, ENT4	http://www.genome.jp/dbget-bin/www_bget?ko:K03323
c56575_g1_i1	K02913	RP-L33, MRPL33, rpmG	http://www.genome.jp/dbget-bin/www_bget?ko:K02913	path:ko03010
c56969_g1_i1	K10902	RECQL5	http://www.genome.jp/dbget-bin/www_bget?ko:K10902
c56430_g1_i1	K12848	SNU23	http://www.genome.jp/dbget-bin/www_bget?ko:K12848	path:ko03040
c56714_g1_i1	K09490	HSPA5, BIP	http://www.genome.jp/dbget-bin/www_bget?ko:K09490	path:ko03060;path:ko04141;path:ko04918;path:ko05020
c57017_g1_i1	K05694	PTPRB, PTPB	http://www.genome.jp/dbget-bin/www_bget?ko:K05694	path:ko04520
c56858_g1_i1	K15192	BTAF1, MOT1	http://www.genome.jp/dbget-bin/www_bget?ko:K15192
c56851_g1_i1	K04955	HCN2	http://www.genome.jp/dbget-bin/www_bget?ko:K04955	path:ko04024
c56433_g1_i1	K04599	MTH	http://www.genome.jp/dbget-bin/www_bget?ko:K04599
c56802_g1_i1	K04911	KCNH8	http://www.genome.jp/dbget-bin/www_bget?ko:K04911
c56616_g1_i1	K08145	SLC2A8, GLUT8	http://www.genome.jp/dbget-bin/www_bget?ko:K08145
c56365_g1_i1	K14937	CYP15A1	http://www.genome.jp/dbget-bin/www_bget?ko:K14937	path:ko00981;path:ko01110
c56186_g1_i1	K09228	KRAB	http://www.genome.jp/dbget-bin/www_bget?ko:K09228
c56148_g1_i1	K04086	clpL	http://www.genome.jp/dbget-bin/www_bget?ko:K04086
c56725_g1_i1	K05665	ABCC1	http://www.genome.jp/dbget-bin/www_bget?ko:K05665	path:ko02010;path:ko04977;path:ko05206
c56438_g1_i1	K00142	AASDH	http://www.genome.jp/dbget-bin/www_bget?ko:K00142
c56699_g1_i1	K00863	E2.7.1.29, DAK1, DAK2	http://www.genome.jp/dbget-bin/www_bget?ko:K00863	path:ko00561;path:ko00680;path:ko01100;path:ko01120;path:ko01200;path:ko04622
c56721_g1_i1	K01360	PCSK2	http://www.genome.jp/dbget-bin/www_bget?ko:K01360
c56933_g1_i1	K11421	SETDB	http://www.genome.jp/dbget-bin/www_bget?ko:K11421	path:ko00310
c56589_g1_i1	K15694	RNF43	http://www.genome.jp/dbget-bin/www_bget?ko:K15694
c56542_g1_i1	K14032	NR2F3, svp	http://www.genome.jp/dbget-bin/www_bget?ko:K14032
c56413_g1_i1	K15178	RTF1	http://www.genome.jp/dbget-bin/www_bget?ko:K15178
c56270_g1_i1	K14383	SLC5A3, SMIT	http://www.genome.jp/dbget-bin/www_bget?ko:K14383
c56154_g1_i1	K01275	CTSC	http://www.genome.jp/dbget-bin/www_bget?ko:K01275	path:ko04142
c57005_g1_i1	K13755	PDE1	http://www.genome.jp/dbget-bin/www_bget?ko:K13755	path:ko00230;path:ko04020;path:ko05032
c56483_g1_i1	K01134	ARSA	http://www.genome.jp/dbget-bin/www_bget?ko:K01134	path:ko00600;path:ko04142
c56129_g1_i1	K16342	PLA2G4, CPLA2	http://www.genome.jp/dbget-bin/www_bget?ko:K16342	path:ko00564;path:ko00565;path:ko00590;path:ko00591;path:ko00592;path:ko01100;path:ko04010;path:ko04014;path:ko04270;path:ko04370;path:ko04611;path:ko04664;path:ko04724;path:ko04726;path:ko04730;path:ko04750;path:ko04912;path:ko04913;path:ko04921
c56596_g1_i1	K14985	CYP18A1	http://www.genome.jp/dbget-bin/www_bget?ko:K14985	path:ko00981;path:ko01110
c56559_g1_i1	K14072	NEPYR	http://www.genome.jp/dbget-bin/www_bget?ko:K14072
c56740_g1_i1	K14616	CUBN	http://www.genome.jp/dbget-bin/www_bget?ko:K14616	path:ko04977
c56158_g1_i1	K05030	CLCA4	http://www.genome.jp/dbget-bin/www_bget?ko:K05030	path:ko04740;path:ko04972
c56807_g1_i1	K03900	VWF	http://www.genome.jp/dbget-bin/www_bget?ko:K03900	path:ko04151;path:ko04510;path:ko04512;path:ko04610;path:ko04611
c56723_g1_i1	K04984	TRPA1, ANKTM1	http://www.genome.jp/dbget-bin/www_bget?ko:K04984	path:ko04750
c57110_g1_i1	K09228	KRAB	http://www.genome.jp/dbget-bin/www_bget?ko:K09228
c56440_g1_i1	K08052	NF1	http://www.genome.jp/dbget-bin/www_bget?ko:K08052	path:ko04010;path:ko04014
c56733_g1_i1	K09542	CRYAB	http://www.genome.jp/dbget-bin/www_bget?ko:K09542	path:ko04141
c56316_g1_i1	K09228	KRAB	http://www.genome.jp/dbget-bin/www_bget?ko:K09228
c57094_g1_i1	K10846	ERCC5, XPG, RAD2	http://www.genome.jp/dbget-bin/www_bget?ko:K10846	path:ko03420
c56734_g1_i1	K17894	GATA2	http://www.genome.jp/dbget-bin/www_bget?ko:K17894
c56060_g1_i1	K02867	RP-L11, MRPL11, rplK	http://www.genome.jp/dbget-bin/www_bget?ko:K02867	path:ko03010
c56794_g1_i1	K03006	RPB1, POLR2A	http://www.genome.jp/dbget-bin/www_bget?ko:K03006	path:ko00230;path:ko00240;path:ko01100;path:ko03020;path:ko05016;path:ko05168;path:ko05169
c56726_g1_i1	K01480	E3.5.3.11, speB	http://www.genome.jp/dbget-bin/www_bget?ko:K01480	path:ko00330;path:ko01100
c56387_g1_i1	K01620	ltaE	http://www.genome.jp/dbget-bin/www_bget?ko:K01620	path:ko00260;path:ko01100;path:ko01110;path:ko01120;path:ko01230
c56377_g1_i1	K01963	accD	http://www.genome.jp/dbget-bin/www_bget?ko:K01963	path:ko00061;path:ko00253;path:ko00620;path:ko00640;path:ko00720;path:ko01100;path:ko01110;path:ko01120;path:ko01200;path:ko01212
c56785_g1_i1	K00700	glgB	http://www.genome.jp/dbget-bin/www_bget?ko:K00700	path:ko00500;path:ko01100;path:ko01110
c56190_g1_i1	K17591	RIMBP2	http://www.genome.jp/dbget-bin/www_bget?ko:K17591
c56836_g1_i1	K05324	KCNQN	http://www.genome.jp/dbget-bin/www_bget?ko:K05324
c56312_g1_i1	K17914	KIF13	http://www.genome.jp/dbget-bin/www_bget?ko:K17914
c57053_g1_i1	K11865	MYSM1	http://www.genome.jp/dbget-bin/www_bget?ko:K11865
c57036_g1_i1	K15690	RC3H	http://www.genome.jp/dbget-bin/www_bget?ko:K15690
c56193_g1_i1	K00314	SARDH	http://www.genome.jp/dbget-bin/www_bget?ko:K00314	path:ko00260;path:ko01100
c56511_g1_i1	K12893	SFRS4_5_6	http://www.genome.jp/dbget-bin/www_bget?ko:K12893	path:ko03040;path:ko05168
c56110_g1_i1	K10380	ANK	http://www.genome.jp/dbget-bin/www_bget?ko:K10380	path:ko05205
c32951_g1_i1	K00683	E2.3.2.5	http://www.genome.jp/dbget-bin/www_bget?ko:K00683
c32951_g1_i2	K00683	E2.3.2.5	http://www.genome.jp/dbget-bin/www_bget?ko:K00683
c32951_g1_i3	K00683	E2.3.2.5	http://www.genome.jp/dbget-bin/www_bget?ko:K00683
c32951_g1_i4	K01518	E3.6.1.17	http://www.genome.jp/dbget-bin/www_bget?ko:K01518	path:ko00230;path:ko00240
c32801_g1_i1	K09228	KRAB	http://www.genome.jp/dbget-bin/www_bget?ko:K09228
c32801_g1_i2	K09228	KRAB	http://www.genome.jp/dbget-bin/www_bget?ko:K09228
c32801_g1_i3	K09228	KRAB	http://www.genome.jp/dbget-bin/www_bget?ko:K09228
c32958_g1_i1	K01262	pepP	http://www.genome.jp/dbget-bin/www_bget?ko:K01262
c32958_g1_i3	K01262	pepP	http://www.genome.jp/dbget-bin/www_bget?ko:K01262
c32958_g1_i4	K01262	pepP	http://www.genome.jp/dbget-bin/www_bget?ko:K01262
c33073_g1_i1	K12883	NCBP2, CBP20	http://www.genome.jp/dbget-bin/www_bget?ko:K12883	path:ko03013;path:ko03015;path:ko03040
c32496_g1_i1	K03848	ALG6	http://www.genome.jp/dbget-bin/www_bget?ko:K03848	path:ko00510;path:ko01100
c32496_g2_i1	K00869	E2.7.1.36, MVK, mvaK1	http://www.genome.jp/dbget-bin/www_bget?ko:K00869	path:ko00900;path:ko01100;path:ko01110;path:ko04146
c32465_g1_i1	K06619	ABL1	http://www.genome.jp/dbget-bin/www_bget?ko:K06619	path:ko04012;path:ko04014;path:ko04110;path:ko04360;path:ko04722;path:ko05130;path:ko05131;path:ko05200;path:ko05206;path:ko05220;path:ko05416
c32465_g1_i2	K06619	ABL1	http://www.genome.jp/dbget-bin/www_bget?ko:K06619	path:ko04012;path:ko04014;path:ko04110;path:ko04360;path:ko04722;path:ko05130;path:ko05131;path:ko05200;path:ko05206;path:ko05220;path:ko05416
c32465_g1_i3	K06619	ABL1	http://www.genome.jp/dbget-bin/www_bget?ko:K06619	path:ko04012;path:ko04014;path:ko04110;path:ko04360;path:ko04722;path:ko05130;path:ko05131;path:ko05200;path:ko05206;path:ko05220;path:ko05416
c33002_g1_i1	K15281	SLC35D	http://www.genome.jp/dbget-bin/www_bget?ko:K15281
c33002_g1_i2	K15281	SLC35D	http://www.genome.jp/dbget-bin/www_bget?ko:K15281
c32924_g1_i1	K09699	E2.3.1.168, bkdB	http://www.genome.jp/dbget-bin/www_bget?ko:K09699	path:ko00280;path:ko01100;path:ko01110
c32345_g2_i1	K04911	KCNH8	http://www.genome.jp/dbget-bin/www_bget?ko:K04911
c32345_g1_i2	K04911	KCNH8	http://www.genome.jp/dbget-bin/www_bget?ko:K04911
c32519_g1_i1	K14258	TRET1	http://www.genome.jp/dbget-bin/www_bget?ko:K14258
c32519_g1_i2	K14258	TRET1	http://www.genome.jp/dbget-bin/www_bget?ko:K14258
c32549_g1_i1	K12600	SKI3, TTC37	http://www.genome.jp/dbget-bin/www_bget?ko:K12600	path:ko03018
c32480_g1_i1	K06820	PLXNA	http://www.genome.jp/dbget-bin/www_bget?ko:K06820	path:ko04360
c32480_g1_i2	K06820	PLXNA	http://www.genome.jp/dbget-bin/www_bget?ko:K06820	path:ko04360
c32480_g1_i3	K06820	PLXNA	http://www.genome.jp/dbget-bin/www_bget?ko:K06820	path:ko04360
c32480_g1_i4	K06820	PLXNA	http://www.genome.jp/dbget-bin/www_bget?ko:K06820	path:ko04360
c32480_g1_i5	K06820	PLXNA	http://www.genome.jp/dbget-bin/www_bget?ko:K06820	path:ko04360
c32480_g2_i1	K06689	UBE2D_E, UBC4, UBC5	http://www.genome.jp/dbget-bin/www_bget?ko:K06689	path:ko04120;path:ko04141
c32480_g2_i2	K06689	UBE2D_E, UBC4, UBC5	http://www.genome.jp/dbget-bin/www_bget?ko:K06689	path:ko04120;path:ko04141
c32498_g1_i1	K01173	ENDOG	http://www.genome.jp/dbget-bin/www_bget?ko:K01173	path:ko04210
c32383_g1_i1	K15686	MEX3, RKHD	http://www.genome.jp/dbget-bin/www_bget?ko:K15686
c32383_g2_i1	K13099	CD2BP2, PPP1R59	http://www.genome.jp/dbget-bin/www_bget?ko:K13099
c32347_g1_i1	K01115	PLD1_2	http://www.genome.jp/dbget-bin/www_bget?ko:K01115	path:ko00564;path:ko00565;path:ko01100;path:ko04014;path:ko04024;path:ko04144;path:ko04666;path:ko04724;path:ko04912
c32458_g1_i1	K06270	PPP1R12A, MYPT1	http://www.genome.jp/dbget-bin/www_bget?ko:K06270	path:ko04022;path:ko04024;path:ko04270;path:ko04510;path:ko04611;path:ko04810;path:ko04921;path:ko05205
c32458_g1_i2	K06270	PPP1R12A, MYPT1	http://www.genome.jp/dbget-bin/www_bget?ko:K06270	path:ko04022;path:ko04024;path:ko04270;path:ko04510;path:ko04611;path:ko04810;path:ko04921;path:ko05205
c32458_g1_i3	K06270	PPP1R12A, MYPT1	http://www.genome.jp/dbget-bin/www_bget?ko:K06270	path:ko04022;path:ko04024;path:ko04270;path:ko04510;path:ko04611;path:ko04810;path:ko04921;path:ko05205
c32458_g1_i4	K06270	PPP1R12A, MYPT1	http://www.genome.jp/dbget-bin/www_bget?ko:K06270	path:ko04022;path:ko04024;path:ko04270;path:ko04510;path:ko04611;path:ko04810;path:ko04921;path:ko05205
c32337_g1_i1	K08867	WNK, PRKWNK	http://www.genome.jp/dbget-bin/www_bget?ko:K08867
c32337_g1_i2	K08867	WNK, PRKWNK	http://www.genome.jp/dbget-bin/www_bget?ko:K08867
c32337_g1_i4	K08867	WNK, PRKWNK	http://www.genome.jp/dbget-bin/www_bget?ko:K08867
c32697_g1_i1	K15601	KDM3	http://www.genome.jp/dbget-bin/www_bget?ko:K15601
c32697_g1_i2	K15601	KDM3	http://www.genome.jp/dbget-bin/www_bget?ko:K15601
c32697_g1_i3	K15601	KDM3	http://www.genome.jp/dbget-bin/www_bget?ko:K15601
c32862_g1_i1	K09493	CCT1, TCP1	http://www.genome.jp/dbget-bin/www_bget?ko:K09493
c32535_g1_i1	K00649	GNPAT	http://www.genome.jp/dbget-bin/www_bget?ko:K00649	path:ko00564;path:ko04146
c33072_g1_i1	K09228	KRAB	http://www.genome.jp/dbget-bin/www_bget?ko:K09228
c33072_g1_i2	K09228	KRAB	http://www.genome.jp/dbget-bin/www_bget?ko:K09228
c32720_g1_i1	K01047	PLA2G, SPLA2	http://www.genome.jp/dbget-bin/www_bget?ko:K01047	path:ko00564;path:ko00565;path:ko00590;path:ko00591;path:ko00592;path:ko01100;path:ko04014;path:ko04270;path:ko04972;path:ko04975
c32720_g1_i3	K01047	PLA2G, SPLA2	http://www.genome.jp/dbget-bin/www_bget?ko:K01047	path:ko00564;path:ko00565;path:ko00590;path:ko00591;path:ko00592;path:ko01100;path:ko04014;path:ko04270;path:ko04972;path:ko04975
c32720_g1_i4	K01047	PLA2G, SPLA2	http://www.genome.jp/dbget-bin/www_bget?ko:K01047	path:ko00564;path:ko00565;path:ko00590;path:ko00591;path:ko00592;path:ko01100;path:ko04014;path:ko04270;path:ko04972;path:ko04975
c32599_g1_i1	K14834	NOC3	http://www.genome.jp/dbget-bin/www_bget?ko:K14834
c32621_g1_i1	K17387	KIF23	http://www.genome.jp/dbget-bin/www_bget?ko:K17387	path:ko05206
c32857_g1_i1	K15728	LPIN	http://www.genome.jp/dbget-bin/www_bget?ko:K15728	path:ko00561;path:ko00564;path:ko01100
c32857_g1_i2	K15728	LPIN	http://www.genome.jp/dbget-bin/www_bget?ko:K15728	path:ko00561;path:ko00564;path:ko01100
c32857_g1_i3	K15728	LPIN	http://www.genome.jp/dbget-bin/www_bget?ko:K15728	path:ko00561;path:ko00564;path:ko01100
c32443_g1_i1	K12812	UAP56, BAT1, SUB2	http://www.genome.jp/dbget-bin/www_bget?ko:K12812	path:ko03013;path:ko03015;path:ko03040;path:ko05164
c33007_g1_i1	K00760	hprT, hpt, HPRT1	http://www.genome.jp/dbget-bin/www_bget?ko:K00760	path:ko00230;path:ko00983;path:ko01100;path:ko01110
c33007_g1_i2	K00760	hprT, hpt, HPRT1	http://www.genome.jp/dbget-bin/www_bget?ko:K00760	path:ko00230;path:ko00983;path:ko01100;path:ko01110
c33007_g1_i3	K00760	hprT, hpt, HPRT1	http://www.genome.jp/dbget-bin/www_bget?ko:K00760	path:ko00230;path:ko00983;path:ko01100;path:ko01110
c32664_g1_i1	K06641	CHK2	http://www.genome.jp/dbget-bin/www_bget?ko:K06641	path:ko04110;path:ko04111;path:ko04115;path:ko05166
c32664_g1_i2	K06641	CHK2	http://www.genome.jp/dbget-bin/www_bget?ko:K06641	path:ko04110;path:ko04111;path:ko04115;path:ko05166
c32466_g1_i1	K13144	INTS7	http://www.genome.jp/dbget-bin/www_bget?ko:K13144
c32161_g1_i1	K14553	UTP18	http://www.genome.jp/dbget-bin/www_bget?ko:K14553	path:ko03008
c32886_g1_i1	K02602	ORB	http://www.genome.jp/dbget-bin/www_bget?ko:K02602	path:ko04114;path:ko04320;path:ko04914
c32570_g1_i1	K08669	HTRA2, PRSS25	http://www.genome.jp/dbget-bin/www_bget?ko:K08669	path:ko05012
c32570_g1_i2	K08669	HTRA2, PRSS25	http://www.genome.jp/dbget-bin/www_bget?ko:K08669	path:ko05012
c33124_g1_i1	K13111	SMU1	http://www.genome.jp/dbget-bin/www_bget?ko:K13111
c33124_g1_i2	K13111	SMU1	http://www.genome.jp/dbget-bin/www_bget?ko:K13111
c32579_g2_i1	K16469	CROCC	http://www.genome.jp/dbget-bin/www_bget?ko:K16469
c32615_g1_i1	K09228	KRAB	http://www.genome.jp/dbget-bin/www_bget?ko:K09228
c32167_g2_i1	K02685	PRI2	http://www.genome.jp/dbget-bin/www_bget?ko:K02685	path:ko00230;path:ko00240;path:ko01100;path:ko03030
c32116_g1_i1	K17923	SNX9_18_33	http://www.genome.jp/dbget-bin/www_bget?ko:K17923
c32273_g1_i1	K00412	CYTB, petB	http://www.genome.jp/dbget-bin/www_bget?ko:K00412	path:ko00190;path:ko01100;path:ko02020;path:ko04260;path:ko04932;path:ko05010;path:ko05012;path:ko05016
c32637_g1_i1	K12316	GAA	http://www.genome.jp/dbget-bin/www_bget?ko:K12316	path:ko00052;path:ko00500;path:ko01100;path:ko04142
c32637_g1_i2	K12316	GAA	http://www.genome.jp/dbget-bin/www_bget?ko:K12316	path:ko00052;path:ko00500;path:ko01100;path:ko04142
c32957_g1_i1	K12866	WBP11, NPWBP	http://www.genome.jp/dbget-bin/www_bget?ko:K12866	path:ko03040
c33134_g1_i1	K09228	KRAB	http://www.genome.jp/dbget-bin/www_bget?ko:K09228
c33024_g1_i1	K12035	TRIM71	http://www.genome.jp/dbget-bin/www_bget?ko:K12035	path:ko05206
c32328_g1_i1	K00654	E2.3.1.50	http://www.genome.jp/dbget-bin/www_bget?ko:K00654	path:ko00600;path:ko01100
c32667_g1_i1	K06638	MAD1L	http://www.genome.jp/dbget-bin/www_bget?ko:K06638	path:ko04110;path:ko04914;path:ko05203
c32583_g1_i1	K03510	POLI	http://www.genome.jp/dbget-bin/www_bget?ko:K03510	path:ko03460
c32583_g2_i1	K03510	POLI	http://www.genome.jp/dbget-bin/www_bget?ko:K03510	path:ko03460
c32412_g1_i1	K01080	PPAP2	http://www.genome.jp/dbget-bin/www_bget?ko:K01080	path:ko00561;path:ko00564;path:ko00565;path:ko00600;path:ko01100;path:ko04666;path:ko04975
c32412_g1_i2	K01080	PPAP2	http://www.genome.jp/dbget-bin/www_bget?ko:K01080	path:ko00561;path:ko00564;path:ko00565;path:ko00600;path:ko01100;path:ko04666;path:ko04975
c32626_g1_i1	K12345	SRD5A3	http://www.genome.jp/dbget-bin/www_bget?ko:K12345	path:ko00140
c32626_g1_i2	K12345	SRD5A3	http://www.genome.jp/dbget-bin/www_bget?ko:K12345	path:ko00140
c32159_g1_i1	K16543	CEP89	http://www.genome.jp/dbget-bin/www_bget?ko:K16543
c32128_g1_i1	K00587	ICMT, STE14	http://www.genome.jp/dbget-bin/www_bget?ko:K00587	path:ko00900
c33085_g1_i1	K17257	ITFG1	http://www.genome.jp/dbget-bin/www_bget?ko:K17257
c32588_g2_i1	K15323	TSEN34	http://www.genome.jp/dbget-bin/www_bget?ko:K15323
c32588_g2_i2	K15323	TSEN34	http://www.genome.jp/dbget-bin/www_bget?ko:K15323
c32588_g2_i3	K15323	TSEN34	http://www.genome.jp/dbget-bin/www_bget?ko:K15323
c33022_g1_i1	K17917	SNX1_2	http://www.genome.jp/dbget-bin/www_bget?ko:K17917
c33022_g1_i2	K17917	SNX1_2	http://www.genome.jp/dbget-bin/www_bget?ko:K17917
c33022_g1_i3	K17917	SNX1_2	http://www.genome.jp/dbget-bin/www_bget?ko:K17917
c33022_g1_i4	K17917	SNX1_2	http://www.genome.jp/dbget-bin/www_bget?ko:K17917
c33022_g1_i5	K17917	SNX1_2	http://www.genome.jp/dbget-bin/www_bget?ko:K17917
c33022_g1_i6	K17917	SNX1_2	http://www.genome.jp/dbget-bin/www_bget?ko:K17917
c33022_g1_i7	K17917	SNX1_2	http://www.genome.jp/dbget-bin/www_bget?ko:K17917
c33022_g1_i8	K17917	SNX1_2	http://www.genome.jp/dbget-bin/www_bget?ko:K17917
c33022_g1_i9	K17917	SNX1_2	http://www.genome.jp/dbget-bin/www_bget?ko:K17917
c33022_g1_i10	K17917	SNX1_2	http://www.genome.jp/dbget-bin/www_bget?ko:K17917
c33022_g1_i11	K17917	SNX1_2	http://www.genome.jp/dbget-bin/www_bget?ko:K17917
c32333_g1_i1	K08619	ADAMTS3	http://www.genome.jp/dbget-bin/www_bget?ko:K08619
c32670_g1_i1	K06027	NSF	http://www.genome.jp/dbget-bin/www_bget?ko:K06027	path:ko04721;path:ko04727;path:ko04962
c32758_g1_i1	K08826	HIPK	http://www.genome.jp/dbget-bin/www_bget?ko:K08826
c32758_g1_i2	K08826	HIPK	http://www.genome.jp/dbget-bin/www_bget?ko:K08826
c32758_g1_i3	K08826	HIPK	http://www.genome.jp/dbget-bin/www_bget?ko:K08826
c33071_g1_i1	K10869	RAD51L1, RAD51B	http://www.genome.jp/dbget-bin/www_bget?ko:K10869	path:ko03440
c33071_g1_i2	K10869	RAD51L1, RAD51B	http://www.genome.jp/dbget-bin/www_bget?ko:K10869	path:ko03440
c32831_g1_i1	K00600	glyA, SHMT	http://www.genome.jp/dbget-bin/www_bget?ko:K00600	path:ko00260;path:ko00460;path:ko00630;path:ko00670;path:ko00680;path:ko01100;path:ko01110;path:ko01120;path:ko01200;path:ko01230
c32912_g1_i2	K09228	KRAB	http://www.genome.jp/dbget-bin/www_bget?ko:K09228
c32771_g1_i1	K12460	KIDINS220, ARMS	http://www.genome.jp/dbget-bin/www_bget?ko:K12460	path:ko04722
c32771_g1_i2	K12460	KIDINS220, ARMS	http://www.genome.jp/dbget-bin/www_bget?ko:K12460	path:ko04722
c32732_g1_i1	K15292	STXBP1, MUNC18-1	http://www.genome.jp/dbget-bin/www_bget?ko:K15292	path:ko04721
c32215_g1_i1	K00798	E2.5.1.17, cobO, btuR	http://www.genome.jp/dbget-bin/www_bget?ko:K00798	path:ko00860;path:ko01100
c32215_g1_i2	K00798	E2.5.1.17, cobO, btuR	http://www.genome.jp/dbget-bin/www_bget?ko:K00798	path:ko00860;path:ko01100
c32215_g1_i3	K00798	E2.5.1.17, cobO, btuR	http://www.genome.jp/dbget-bin/www_bget?ko:K00798	path:ko00860;path:ko01100
c32215_g1_i4	K00798	E2.5.1.17, cobO, btuR	http://www.genome.jp/dbget-bin/www_bget?ko:K00798	path:ko00860;path:ko01100
c32883_g1_i1	K06778	PTPRS	http://www.genome.jp/dbget-bin/www_bget?ko:K06778
c32883_g1_i2	K06778	PTPRS	http://www.genome.jp/dbget-bin/www_bget?ko:K06778
c32883_g1_i3	K06778	PTPRS	http://www.genome.jp/dbget-bin/www_bget?ko:K06778
c32643_g1_i1	K00456	CDO1	http://www.genome.jp/dbget-bin/www_bget?ko:K00456	path:ko00270;path:ko00430;path:ko01100
c33033_g1_i1	K08775	BRCA2, FANCD1	http://www.genome.jp/dbget-bin/www_bget?ko:K08775	path:ko03440;path:ko03460;path:ko05200;path:ko05212
c33033_g1_i2	K08775	BRCA2, FANCD1	http://www.genome.jp/dbget-bin/www_bget?ko:K08775	path:ko03440;path:ko03460;path:ko05200;path:ko05212
c32431_g1_i2	K11976	RNF216	http://www.genome.jp/dbget-bin/www_bget?ko:K11976
c32824_g1_i1	K04727	PDCD8, AIF	http://www.genome.jp/dbget-bin/www_bget?ko:K04727	path:ko04210
c32824_g1_i4	K04727	PDCD8, AIF	http://www.genome.jp/dbget-bin/www_bget?ko:K04727	path:ko04210
c32718_g1_i1	K03495	gidA, mnmG, MTO1	http://www.genome.jp/dbget-bin/www_bget?ko:K03495
c32340_g1_i1	K11374	ELP2	http://www.genome.jp/dbget-bin/www_bget?ko:K11374
c33023_g1_i1	K10728	TOPBP1	http://www.genome.jp/dbget-bin/www_bget?ko:K10728
c33023_g1_i2	K10728	TOPBP1	http://www.genome.jp/dbget-bin/www_bget?ko:K10728
c32743_g1_i1	K00472	E1.14.11.2	http://www.genome.jp/dbget-bin/www_bget?ko:K00472	path:ko00330;path:ko01100
c32743_g1_i2	K00472	E1.14.11.2	http://www.genome.jp/dbget-bin/www_bget?ko:K00472	path:ko00330;path:ko01100
c32741_g1_i1	K16315	GSG2	http://www.genome.jp/dbget-bin/www_bget?ko:K16315
c32741_g1_i2	K16315	GSG2	http://www.genome.jp/dbget-bin/www_bget?ko:K16315
c32174_g1_i1	K11090	LA, SSB	http://www.genome.jp/dbget-bin/www_bget?ko:K11090	path:ko05322
c32395_g1_i1	K10692	LNX1_2	http://www.genome.jp/dbget-bin/www_bget?ko:K10692
c32395_g1_i2	K10692	LNX1_2	http://www.genome.jp/dbget-bin/www_bget?ko:K10692
c32395_g1_i3	K10692	LNX1_2	http://www.genome.jp/dbget-bin/www_bget?ko:K10692
c32395_g1_i4	K10692	LNX1_2	http://www.genome.jp/dbget-bin/www_bget?ko:K10692
c32395_g1_i5	K10692	LNX1_2	http://www.genome.jp/dbget-bin/www_bget?ko:K10692
c32194_g1_i1	K00764	purF, PPAT	http://www.genome.jp/dbget-bin/www_bget?ko:K00764	path:ko00230;path:ko00250;path:ko01100;path:ko01110
c32411_g1_i1	K01115	PLD1_2	http://www.genome.jp/dbget-bin/www_bget?ko:K01115	path:ko00564;path:ko00565;path:ko01100;path:ko04014;path:ko04024;path:ko04144;path:ko04666;path:ko04724;path:ko04912
c32133_g1_i1	K10884	XRCC6, KU70, G22P1	http://www.genome.jp/dbget-bin/www_bget?ko:K10884	path:ko03450
c32613_g1_i1	K00710	GALNT	http://www.genome.jp/dbget-bin/www_bget?ko:K00710	path:ko00512;path:ko01100
c32613_g1_i2	K00710	GALNT	http://www.genome.jp/dbget-bin/www_bget?ko:K00710	path:ko00512;path:ko01100
c32163_g1_i1	K11205	GCLM	http://www.genome.jp/dbget-bin/www_bget?ko:K11205	path:ko00480;path:ko01100
c32144_g2_i1	K06133	LYS5, acpT	http://www.genome.jp/dbget-bin/www_bget?ko:K06133	path:ko00770
c32144_g2_i2	K06133	LYS5, acpT	http://www.genome.jp/dbget-bin/www_bget?ko:K06133	path:ko00770
c32725_g1_i1	K09228	KRAB	http://www.genome.jp/dbget-bin/www_bget?ko:K09228
c32536_g1_i1	K00799	GST, gst	http://www.genome.jp/dbget-bin/www_bget?ko:K00799	path:ko00480;path:ko00980;path:ko00982;path:ko05204
c32536_g1_i2	K00799	GST, gst	http://www.genome.jp/dbget-bin/www_bget?ko:K00799	path:ko00480;path:ko00980;path:ko00982;path:ko05204
c32536_g1_i3	K00799	GST, gst	http://www.genome.jp/dbget-bin/www_bget?ko:K00799	path:ko00480;path:ko00980;path:ko00982;path:ko05204
c32373_g1_i1	K13963	SERPINB	http://www.genome.jp/dbget-bin/www_bget?ko:K13963	path:ko05146
c33045_g1_i1	K12492	ARFGAP1	http://www.genome.jp/dbget-bin/www_bget?ko:K12492	path:ko04144
c32639_g1_i1	K04725	XIAP, BIRC4	http://www.genome.jp/dbget-bin/www_bget?ko:K04725	path:ko04064;path:ko04120;path:ko04210;path:ko04510;path:ko05145;path:ko05166;path:ko05200;path:ko05222
c32639_g1_i2	K04725	XIAP, BIRC4	http://www.genome.jp/dbget-bin/www_bget?ko:K04725	path:ko04064;path:ko04120;path:ko04210;path:ko04510;path:ko05145;path:ko05166;path:ko05200;path:ko05222
c32639_g1_i3	K04725	XIAP, BIRC4	http://www.genome.jp/dbget-bin/www_bget?ko:K04725	path:ko04064;path:ko04120;path:ko04210;path:ko04510;path:ko05145;path:ko05166;path:ko05200;path:ko05222
c32639_g1_i4	K04725	XIAP, BIRC4	http://www.genome.jp/dbget-bin/www_bget?ko:K04725	path:ko04064;path:ko04120;path:ko04210;path:ko04510;path:ko05145;path:ko05166;path:ko05200;path:ko05222
c32511_g1_i1	K09228	KRAB	http://www.genome.jp/dbget-bin/www_bget?ko:K09228
c32511_g1_i2	K09228	KRAB	http://www.genome.jp/dbget-bin/www_bget?ko:K09228
c32531_g1_i1	K10801	MBD4	http://www.genome.jp/dbget-bin/www_bget?ko:K10801	path:ko03410
c32531_g1_i2	K10801	MBD4	http://www.genome.jp/dbget-bin/www_bget?ko:K10801	path:ko03410
c32531_g1_i3	K10801	MBD4	http://www.genome.jp/dbget-bin/www_bget?ko:K10801	path:ko03410
c32433_g1_i1	K07765	MBTPS2	http://www.genome.jp/dbget-bin/www_bget?ko:K07765	path:ko04141
c32433_g1_i2	K07765	MBTPS2	http://www.genome.jp/dbget-bin/www_bget?ko:K07765	path:ko04141
c32283_g2_i1	K03255	TIF31, CLU1	http://www.genome.jp/dbget-bin/www_bget?ko:K03255
c32195_g1_i1	K09228	KRAB	http://www.genome.jp/dbget-bin/www_bget?ko:K09228
c32236_g1_i1	K11363	SGF11	http://www.genome.jp/dbget-bin/www_bget?ko:K11363
c32451_g2_i1	K16678	EGR	http://www.genome.jp/dbget-bin/www_bget?ko:K16678	path:ko04391
c32277_g1_i1	K09521	DNAJC1	http://www.genome.jp/dbget-bin/www_bget?ko:K09521	path:ko04141
c32992_g1_i1	K05906	PCYOX1, FCLY	http://www.genome.jp/dbget-bin/www_bget?ko:K05906	path:ko00900
c32992_g2_i1	K05291	PIGS	http://www.genome.jp/dbget-bin/www_bget?ko:K05291	path:ko00563;path:ko01100
c32992_g2_i3	K05291	PIGS	http://www.genome.jp/dbget-bin/www_bget?ko:K05291	path:ko00563;path:ko01100
c32659_g1_i1	K13338	PEX1	http://www.genome.jp/dbget-bin/www_bget?ko:K13338	path:ko04146
c32659_g1_i3	K13338	PEX1	http://www.genome.jp/dbget-bin/www_bget?ko:K13338	path:ko04146
c32802_g1_i2	K10687	UBE2F	http://www.genome.jp/dbget-bin/www_bget?ko:K10687	path:ko04120
c32900_g1_i1	K00965	galT, GALT	http://www.genome.jp/dbget-bin/www_bget?ko:K00965	path:ko00052;path:ko00520;path:ko01100;path:ko01110;path:ko04917
c33101_g1_i1	K13192	RBM26	http://www.genome.jp/dbget-bin/www_bget?ko:K13192
c33101_g1_i2	K13192	RBM26	http://www.genome.jp/dbget-bin/www_bget?ko:K13192
c33101_g1_i3	K13192	RBM26	http://www.genome.jp/dbget-bin/www_bget?ko:K13192
c33025_g1_i1	K17662	CBP3, UQCC	http://www.genome.jp/dbget-bin/www_bget?ko:K17662
c33025_g1_i2	K17662	CBP3, UQCC	http://www.genome.jp/dbget-bin/www_bget?ko:K17662
c32482_g1_i1	K09228	KRAB	http://www.genome.jp/dbget-bin/www_bget?ko:K09228
c32482_g1_i2	K09228	KRAB	http://www.genome.jp/dbget-bin/www_bget?ko:K09228
c32482_g1_i3	K09228	KRAB	http://www.genome.jp/dbget-bin/www_bget?ko:K09228
c33091_g1_i1	K14709	SLC39A1_2_3, ZIP1_2_3	http://www.genome.jp/dbget-bin/www_bget?ko:K14709
c33091_g1_i3	K14709	SLC39A1_2_3, ZIP1_2_3	http://www.genome.jp/dbget-bin/www_bget?ko:K14709
c32987_g1_i1	K12618	XRN1, SEP1, KEM1	http://www.genome.jp/dbget-bin/www_bget?ko:K12618	path:ko03008;path:ko03018
c32461_g1_i3	K00344	qor, CRYZ	http://www.genome.jp/dbget-bin/www_bget?ko:K00344
c32461_g1_i4	K00344	qor, CRYZ	http://www.genome.jp/dbget-bin/www_bget?ko:K00344
c32461_g1_i5	K00344	qor, CRYZ	http://www.genome.jp/dbget-bin/www_bget?ko:K00344
c32690_g1_i1	K05213	GRIN3A	http://www.genome.jp/dbget-bin/www_bget?ko:K05213	path:ko04024;path:ko04080;path:ko04724;path:ko05030;path:ko05031;path:ko05033;path:ko05034
c32690_g1_i2	K05213	GRIN3A	http://www.genome.jp/dbget-bin/www_bget?ko:K05213	path:ko04024;path:ko04080;path:ko04724;path:ko05030;path:ko05031;path:ko05033;path:ko05034
c32690_g1_i3	K05213	GRIN3A	http://www.genome.jp/dbget-bin/www_bget?ko:K05213	path:ko04024;path:ko04080;path:ko04724;path:ko05030;path:ko05031;path:ko05033;path:ko05034
c32199_g1_i1	K01349	FURIN, PCSK3	http://www.genome.jp/dbget-bin/www_bget?ko:K01349	path:ko05164
c33048_g1_i1	K08838	STK24_25_MST4	http://www.genome.jp/dbget-bin/www_bget?ko:K08838
c32665_g1_i1	K02174	BR-C	http://www.genome.jp/dbget-bin/www_bget?ko:K02174	path:ko04320
c32252_g1_i2	K09228	KRAB	http://www.genome.jp/dbget-bin/www_bget?ko:K09228
c32252_g1_i4	K09228	KRAB	http://www.genome.jp/dbget-bin/www_bget?ko:K09228
c32252_g1_i6	K09228	KRAB	http://www.genome.jp/dbget-bin/www_bget?ko:K09228
c32574_g1_i1	K14454	GOT1	http://www.genome.jp/dbget-bin/www_bget?ko:K14454	path:ko00250;path:ko00270;path:ko00330;path:ko00350;path:ko00360;path:ko00400;path:ko00710;path:ko00950;path:ko00960;path:ko01100;path:ko01110;path:ko01120;path:ko01200;path:ko01210;path:ko01230
c33028_g1_i1	K04599	MTH	http://www.genome.jp/dbget-bin/www_bget?ko:K04599
c33028_g1_i2	K04599	MTH	http://www.genome.jp/dbget-bin/www_bget?ko:K04599
c33028_g1_i3	K04599	MTH	http://www.genome.jp/dbget-bin/www_bget?ko:K04599
c33028_g1_i4	K04599	MTH	http://www.genome.jp/dbget-bin/www_bget?ko:K04599
c33028_g1_i5	K04599	MTH	http://www.genome.jp/dbget-bin/www_bget?ko:K04599
c33028_g1_i6	K04599	MTH	http://www.genome.jp/dbget-bin/www_bget?ko:K04599
c33028_g1_i7	K04599	MTH	http://www.genome.jp/dbget-bin/www_bget?ko:K04599
c32238_g1_i2	K04409	PAK1	http://www.genome.jp/dbget-bin/www_bget?ko:K04409	path:ko04010;path:ko04011;path:ko04012;path:ko04014;path:ko04024;path:ko04062;path:ko04360;path:ko04510;path:ko04650;path:ko04660;path:ko04666;path:ko04810;path:ko05120;path:ko05205;path:ko05211
c32238_g1_i3	K04409	PAK1	http://www.genome.jp/dbget-bin/www_bget?ko:K04409	path:ko04010;path:ko04011;path:ko04012;path:ko04014;path:ko04024;path:ko04062;path:ko04360;path:ko04510;path:ko04650;path:ko04660;path:ko04666;path:ko04810;path:ko05120;path:ko05205;path:ko05211
c32499_g1_i1	K16831	BORA	http://www.genome.jp/dbget-bin/www_bget?ko:K16831
c32568_g1_i1	K16538	PIBF1, CEP90	http://www.genome.jp/dbget-bin/www_bget?ko:K16538
c32568_g1_i2	K16538	PIBF1, CEP90	http://www.genome.jp/dbget-bin/www_bget?ko:K16538
c32334_g1_i1	K09057	HLF	http://www.genome.jp/dbget-bin/www_bget?ko:K09057	path:ko04711
c32334_g1_i2	K09057	HLF	http://www.genome.jp/dbget-bin/www_bget?ko:K09057	path:ko04711
c32334_g1_i3	K09057	HLF	http://www.genome.jp/dbget-bin/www_bget?ko:K09057	path:ko04711
c32682_g1_i2	K00799	GST, gst	http://www.genome.jp/dbget-bin/www_bget?ko:K00799	path:ko00480;path:ko00980;path:ko00982;path:ko05204
c32682_g1_i3	K00799	GST, gst	http://www.genome.jp/dbget-bin/www_bget?ko:K00799	path:ko00480;path:ko00980;path:ko00982;path:ko05204
c32682_g1_i4	K00799	GST, gst	http://www.genome.jp/dbget-bin/www_bget?ko:K00799	path:ko00480;path:ko00980;path:ko00982;path:ko05204
c32299_g1_i1	K08515	VAMP7	http://www.genome.jp/dbget-bin/www_bget?ko:K08515	path:ko04130
c32192_g1_i1	K17336	PLS3	http://www.genome.jp/dbget-bin/www_bget?ko:K17336
c32394_g1_i1	K01443	E3.5.1.25, nagA, AMDHD2	http://www.genome.jp/dbget-bin/www_bget?ko:K01443	path:ko00520;path:ko01110
c32341_g1_i1	K17339	ATL	http://www.genome.jp/dbget-bin/www_bget?ko:K17339
c32341_g1_i2	K17339	ATL	http://www.genome.jp/dbget-bin/www_bget?ko:K17339
c32341_g1_i3	K17339	ATL	http://www.genome.jp/dbget-bin/www_bget?ko:K17339
c32262_g1_i1	K00871	PHKG	http://www.genome.jp/dbget-bin/www_bget?ko:K00871	path:ko04020;path:ko04910
c32262_g1_i2	K00871	PHKG	http://www.genome.jp/dbget-bin/www_bget?ko:K00871	path:ko04020;path:ko04910
c32706_g1_i1	K00566	mnmA, trmU, TRMU	http://www.genome.jp/dbget-bin/www_bget?ko:K00566	path:ko04122
c32706_g1_i2	K00566	mnmA, trmU, TRMU	http://www.genome.jp/dbget-bin/www_bget?ko:K00566	path:ko04122
c32668_g2_i1	K08866	TTK, MPS1	http://www.genome.jp/dbget-bin/www_bget?ko:K08866	path:ko04110;path:ko04111
c32990_g1_i1	K02520	infC, MTIF3	http://www.genome.jp/dbget-bin/www_bget?ko:K02520
c32990_g1_i2	K02520	infC, MTIF3	http://www.genome.jp/dbget-bin/www_bget?ko:K02520
c32893_g1_i1	K15074	BACURD	http://www.genome.jp/dbget-bin/www_bget?ko:K15074
c32893_g1_i2	K15074	BACURD	http://www.genome.jp/dbget-bin/www_bget?ko:K15074
c32893_g1_i3	K15074	BACURD	http://www.genome.jp/dbget-bin/www_bget?ko:K15074
c32893_g1_i4	K15074	BACURD	http://www.genome.jp/dbget-bin/www_bget?ko:K15074
c32547_g1_i1	K08209	SLC22A13	http://www.genome.jp/dbget-bin/www_bget?ko:K08209
c32618_g1_i1	K01870	IARS, ileS	http://www.genome.jp/dbget-bin/www_bget?ko:K01870	path:ko00970
c32645_g1_i1	K01227	E3.2.1.96	http://www.genome.jp/dbget-bin/www_bget?ko:K01227	path:ko00511
c32645_g1_i2	K01227	E3.2.1.96	http://www.genome.jp/dbget-bin/www_bget?ko:K01227	path:ko00511
c32860_g1_i1	K01082	E3.1.3.7, cysQ, MET22, BPNT1	http://www.genome.jp/dbget-bin/www_bget?ko:K01082	path:ko00920;path:ko01100;path:ko01120
c32899_g1_i1	K11857	USP47	http://www.genome.jp/dbget-bin/www_bget?ko:K11857
c32899_g1_i2	K11857	USP47	http://www.genome.jp/dbget-bin/www_bget?ko:K11857
c32640_g1_i1	K10640	RNF25, AO7	http://www.genome.jp/dbget-bin/www_bget?ko:K10640
c32948_g1_i1	K17569	GPATCH2	http://www.genome.jp/dbget-bin/www_bget?ko:K17569
c32948_g1_i2	K17569	GPATCH2	http://www.genome.jp/dbget-bin/www_bget?ko:K17569
c32948_g1_i3	K17569	GPATCH2	http://www.genome.jp/dbget-bin/www_bget?ko:K17569
c32948_g1_i4	K17569	GPATCH2	http://www.genome.jp/dbget-bin/www_bget?ko:K17569
c32948_g1_i5	K17569	GPATCH2	http://www.genome.jp/dbget-bin/www_bget?ko:K17569
c32532_g2_i1	K09230	SCAN	http://www.genome.jp/dbget-bin/www_bget?ko:K09230
c32994_g3_i3	K09320	EVX	http://www.genome.jp/dbget-bin/www_bget?ko:K09320
c32994_g3_i4	K09320	EVX	http://www.genome.jp/dbget-bin/www_bget?ko:K09320
c32812_g1_i1	K04592	LPHN1	http://www.genome.jp/dbget-bin/www_bget?ko:K04592
c32812_g1_i2	K04592	LPHN1	http://www.genome.jp/dbget-bin/www_bget?ko:K04592
c33084_g1_i1	K10721	DIB	http://www.genome.jp/dbget-bin/www_bget?ko:K10721	path:ko00981;path:ko01110
c33084_g1_i2	K10721	DIB	http://www.genome.jp/dbget-bin/www_bget?ko:K10721	path:ko00981;path:ko01110
c32942_g1_i1	K06842	SEMA6	http://www.genome.jp/dbget-bin/www_bget?ko:K06842	path:ko04360
c32942_g1_i2	K06842	SEMA6	http://www.genome.jp/dbget-bin/www_bget?ko:K06842	path:ko04360
c32942_g1_i3	K06842	SEMA6	http://www.genome.jp/dbget-bin/www_bget?ko:K06842	path:ko04360
c32300_g1_i1	K09272	SSRP1	http://www.genome.jp/dbget-bin/www_bget?ko:K09272
c32237_g1_i1	K11407	HDAC6_10	http://www.genome.jp/dbget-bin/www_bget?ko:K11407	path:ko05034;path:ko05203
c32237_g1_i2	K11407	HDAC6_10	http://www.genome.jp/dbget-bin/www_bget?ko:K11407	path:ko05034;path:ko05203
c32763_g1_i1	K18024	PTPN12_18_22	http://www.genome.jp/dbget-bin/www_bget?ko:K18024
c32763_g1_i2	K18024	PTPN12_18_22	http://www.genome.jp/dbget-bin/www_bget?ko:K18024
c32904_g1_i1	K04798	pfdB, PFDN6	http://www.genome.jp/dbget-bin/www_bget?ko:K04798
c32157_g1_i1	K03424	tatD	http://www.genome.jp/dbget-bin/www_bget?ko:K03424
c33118_g1_i1	K10352	MYH	http://www.genome.jp/dbget-bin/www_bget?ko:K10352	path:ko04530
c33118_g3_i1	K10352	MYH	http://www.genome.jp/dbget-bin/www_bget?ko:K10352	path:ko04530
c33118_g3_i2	K10352	MYH	http://www.genome.jp/dbget-bin/www_bget?ko:K10352	path:ko04530
c32473_g1_i2	K00901	E2.7.1.107, DGK, dgkA	http://www.genome.jp/dbget-bin/www_bget?ko:K00901	path:ko00561;path:ko00564;path:ko01100;path:ko04070
c32473_g1_i3	K00901	E2.7.1.107, DGK, dgkA	http://www.genome.jp/dbget-bin/www_bget?ko:K00901	path:ko00561;path:ko00564;path:ko01100;path:ko04070
c32473_g1_i4	K00901	E2.7.1.107, DGK, dgkA	http://www.genome.jp/dbget-bin/www_bget?ko:K00901	path:ko00561;path:ko00564;path:ko01100;path:ko04070
c32473_g1_i5	K00901	E2.7.1.107, DGK, dgkA	http://www.genome.jp/dbget-bin/www_bget?ko:K00901	path:ko00561;path:ko00564;path:ko01100;path:ko04070
c32473_g1_i6	K00901	E2.7.1.107, DGK, dgkA	http://www.genome.jp/dbget-bin/www_bget?ko:K00901	path:ko00561;path:ko00564;path:ko01100;path:ko04070
c32585_g1_i1	K01596	E4.1.1.32, pckA, PEPCK	http://www.genome.jp/dbget-bin/www_bget?ko:K01596	path:ko00010;path:ko00020;path:ko00620;path:ko01100;path:ko01110;path:ko01120;path:ko03320;path:ko04068;path:ko04151;path:ko04152;path:ko04910;path:ko04920;path:ko04964
c32585_g1_i2	K01596	E4.1.1.32, pckA, PEPCK	http://www.genome.jp/dbget-bin/www_bget?ko:K01596	path:ko00010;path:ko00020;path:ko00620;path:ko01100;path:ko01110;path:ko01120;path:ko03320;path:ko04068;path:ko04151;path:ko04152;path:ko04910;path:ko04920;path:ko04964
c32894_g1_i1	K14830	MAK11, PAK1IP1	http://www.genome.jp/dbget-bin/www_bget?ko:K14830
c32894_g1_i2	K14830	MAK11, PAK1IP1	http://www.genome.jp/dbget-bin/www_bget?ko:K14830
c32894_g2_i1	K10270	FBXL4	http://www.genome.jp/dbget-bin/www_bget?ko:K10270
c32584_g1_i1	K06110	EXOC3, SEC6L1	http://www.genome.jp/dbget-bin/www_bget?ko:K06110	path:ko04530
c32584_g1_i2	K06110	EXOC3, SEC6L1	http://www.genome.jp/dbget-bin/www_bget?ko:K06110	path:ko04530
c33060_g1_i1	K05467	ANGPT4	http://www.genome.jp/dbget-bin/www_bget?ko:K05467	path:ko04014;path:ko04015;path:ko04066;path:ko04151
c33060_g1_i2	K05467	ANGPT4	http://www.genome.jp/dbget-bin/www_bget?ko:K05467	path:ko04014;path:ko04015;path:ko04066;path:ko04151
c32070_g1_i1	K11653	ARID1	http://www.genome.jp/dbget-bin/www_bget?ko:K11653
c32070_g1_i2	K11653	ARID1	http://www.genome.jp/dbget-bin/www_bget?ko:K11653
c32070_g1_i3	K11653	ARID1	http://www.genome.jp/dbget-bin/www_bget?ko:K11653
c32366_g1_i1	K04377	MYC	http://www.genome.jp/dbget-bin/www_bget?ko:K04377	path:ko04010;path:ko04012;path:ko04110;path:ko04151;path:ko04310;path:ko04350;path:ko04390;path:ko04391;path:ko04630;path:ko04919;path:ko05161;path:ko05166;path:ko05169;path:ko05200;path:ko05202;path:ko05205;path:ko05206;path:ko05210;path:ko05213;path:ko05216;path:ko05219;path:ko05220;path:ko05221;path:ko05222
c32266_g1_i1	K10867	NBN, NBS1	http://www.genome.jp/dbget-bin/www_bget?ko:K10867	path:ko03440
c32821_g1_i5	K03898	KNG	http://www.genome.jp/dbget-bin/www_bget?ko:K03898	path:ko04610
c32821_g1_i10	K10401	KIF18_19	http://www.genome.jp/dbget-bin/www_bget?ko:K10401
c32242_g1_i1	K09255	K09255	http://www.genome.jp/dbget-bin/www_bget?ko:K09255
c32166_g1_i1	K07951	ARL6, BBS3	http://www.genome.jp/dbget-bin/www_bget?ko:K07951
c32756_g1_i1	K05619	TGM1	http://www.genome.jp/dbget-bin/www_bget?ko:K05619
c33043_g1_i1	K10596	UBE4A	http://www.genome.jp/dbget-bin/www_bget?ko:K10596	path:ko04120
c33050_g1_i1	K17495	CSMD	http://www.genome.jp/dbget-bin/www_bget?ko:K17495
c33050_g1_i2	K17495	CSMD	http://www.genome.jp/dbget-bin/www_bget?ko:K17495
c32474_g1_i1	K03671	trxA	http://www.genome.jp/dbget-bin/www_bget?ko:K03671
c32592_g1_i1	K03108	SRP72	http://www.genome.jp/dbget-bin/www_bget?ko:K03108	path:ko03060
c32592_g1_i2	K03108	SRP72	http://www.genome.jp/dbget-bin/www_bget?ko:K03108	path:ko03060
c32688_g2_i1	K12200	PDCD6IP, ALIX, RIM20	http://www.genome.jp/dbget-bin/www_bget?ko:K12200	path:ko04144
c32940_g1_i1	K15326	TSEN54	http://www.genome.jp/dbget-bin/www_bget?ko:K15326
c32506_g1_i1	K08653	MBTPS1	http://www.genome.jp/dbget-bin/www_bget?ko:K08653	path:ko04141
c32506_g1_i2	K08653	MBTPS1	http://www.genome.jp/dbget-bin/www_bget?ko:K08653	path:ko04141
c32329_g1_i1	K12824	TCERG1, CA150	http://www.genome.jp/dbget-bin/www_bget?ko:K12824	path:ko03040
c32329_g1_i2	K12824	TCERG1, CA150	http://www.genome.jp/dbget-bin/www_bget?ko:K12824	path:ko03040
c32329_g1_i3	K12824	TCERG1, CA150	http://www.genome.jp/dbget-bin/www_bget?ko:K12824	path:ko03040
c32329_g1_i4	K12824	TCERG1, CA150	http://www.genome.jp/dbget-bin/www_bget?ko:K12824	path:ko03040
c32329_g1_i5	K12824	TCERG1, CA150	http://www.genome.jp/dbget-bin/www_bget?ko:K12824	path:ko03040
c32318_g1_i1	K00627	DLAT, aceF, pdhC	http://www.genome.jp/dbget-bin/www_bget?ko:K00627	path:ko00010;path:ko00020;path:ko00620;path:ko01100;path:ko01110;path:ko01120;path:ko01200
c32944_g1_i1	K11540	CAD	http://www.genome.jp/dbget-bin/www_bget?ko:K11540	path:ko00240;path:ko00250;path:ko01100
c32944_g1_i2	K11540	CAD	http://www.genome.jp/dbget-bin/www_bget?ko:K11540	path:ko00240;path:ko00250;path:ko01100
c32944_g1_i3	K11540	CAD	http://www.genome.jp/dbget-bin/www_bget?ko:K11540	path:ko00240;path:ko00250;path:ko01100
c32944_g1_i4	K11540	CAD	http://www.genome.jp/dbget-bin/www_bget?ko:K11540	path:ko00240;path:ko00250;path:ko01100
c32944_g1_i5	K11540	CAD	http://www.genome.jp/dbget-bin/www_bget?ko:K11540	path:ko00240;path:ko00250;path:ko01100
c32944_g1_i6	K00720	UGCG	http://www.genome.jp/dbget-bin/www_bget?ko:K00720	path:ko00600;path:ko01100
c32591_g1_i1	K00069	HPGD	http://www.genome.jp/dbget-bin/www_bget?ko:K00069	path:ko05202
c32591_g1_i2	K00069	HPGD	http://www.genome.jp/dbget-bin/www_bget?ko:K00069	path:ko05202
c32602_g1_i1	K08872	RIOK3, SUDD	http://www.genome.jp/dbget-bin/www_bget?ko:K08872
c32602_g1_i2	K08872	RIOK3, SUDD	http://www.genome.jp/dbget-bin/www_bget?ko:K08872
c32602_g1_i3	K08872	RIOK3, SUDD	http://www.genome.jp/dbget-bin/www_bget?ko:K08872
c32210_g2_i1	K10755	RFC2_4	http://www.genome.jp/dbget-bin/www_bget?ko:K10755	path:ko03030;path:ko03420;path:ko03430
c32210_g3_i1	K13134	GEMIN6, SIP2	http://www.genome.jp/dbget-bin/www_bget?ko:K13134	path:ko03013
c32210_g3_i2	K13134	GEMIN6, SIP2	http://www.genome.jp/dbget-bin/www_bget?ko:K13134	path:ko03013
c32711_g1_i1	K10358	MYO6	http://www.genome.jp/dbget-bin/www_bget?ko:K10358
c32263_g1_i1	K00129	E1.2.1.5	http://www.genome.jp/dbget-bin/www_bget?ko:K00129	path:ko00010;path:ko00340;path:ko00350;path:ko00360;path:ko00410;path:ko00980;path:ko00982;path:ko01100;path:ko01120;path:ko05204
c32335_g1_i1	K04468	NLK	http://www.genome.jp/dbget-bin/www_bget?ko:K04468	path:ko04010;path:ko04068;path:ko04310;path:ko04520
c32335_g1_i2	K04468	NLK	http://www.genome.jp/dbget-bin/www_bget?ko:K04468	path:ko04010;path:ko04068;path:ko04310;path:ko04520
c32335_g1_i3	K04468	NLK	http://www.genome.jp/dbget-bin/www_bget?ko:K04468	path:ko04010;path:ko04068;path:ko04310;path:ko04520
c32554_g1_i1	K03006	RPB1, POLR2A	http://www.genome.jp/dbget-bin/www_bget?ko:K03006	path:ko00230;path:ko00240;path:ko01100;path:ko03020;path:ko05016;path:ko05168;path:ko05169
c32554_g2_i1	K03006	RPB1, POLR2A	http://www.genome.jp/dbget-bin/www_bget?ko:K03006	path:ko00230;path:ko00240;path:ko01100;path:ko03020;path:ko05016;path:ko05168;path:ko05169
c32646_g1_i1	K02349	POLQ	http://www.genome.jp/dbget-bin/www_bget?ko:K02349
c32646_g1_i3	K02349	POLQ	http://www.genome.jp/dbget-bin/www_bget?ko:K02349
c32808_g1_i1	K15332	TRMT2A	http://www.genome.jp/dbget-bin/www_bget?ko:K15332
c32808_g1_i2	K15332	TRMT2A	http://www.genome.jp/dbget-bin/www_bget?ko:K15332
c32808_g1_i3	K15332	TRMT2A	http://www.genome.jp/dbget-bin/www_bget?ko:K15332
c32808_g1_i4	K15332	TRMT2A	http://www.genome.jp/dbget-bin/www_bget?ko:K15332
c32808_g1_i5	K15332	TRMT2A	http://www.genome.jp/dbget-bin/www_bget?ko:K15332
c32808_g1_i6	K15332	TRMT2A	http://www.genome.jp/dbget-bin/www_bget?ko:K15332
c32808_g1_i7	K15332	TRMT2A	http://www.genome.jp/dbget-bin/www_bget?ko:K15332
c32852_g2_i1	K16726	ANKRD17, MASK	http://www.genome.jp/dbget-bin/www_bget?ko:K16726
c32852_g3_i1	K16726	ANKRD17, MASK	http://www.genome.jp/dbget-bin/www_bget?ko:K16726
c32171_g1_i1	K14708	SLC26A11	http://www.genome.jp/dbget-bin/www_bget?ko:K14708
c32171_g1_i2	K14708	SLC26A11	http://www.genome.jp/dbget-bin/www_bget?ko:K14708
c32171_g1_i3	K14708	SLC26A11	http://www.genome.jp/dbget-bin/www_bget?ko:K14708
c32171_g1_i4	K14708	SLC26A11	http://www.genome.jp/dbget-bin/www_bget?ko:K14708
c32171_g1_i5	K14708	SLC26A11	http://www.genome.jp/dbget-bin/www_bget?ko:K14708
c32132_g1_i1	K09228	KRAB	http://www.genome.jp/dbget-bin/www_bget?ko:K09228
c32132_g1_i2	K09228	KRAB	http://www.genome.jp/dbget-bin/www_bget?ko:K09228
c32793_g2_i1	K09288	CCDC6, PTC	http://www.genome.jp/dbget-bin/www_bget?ko:K09288	path:ko05200;path:ko05216
c32509_g1_i2	K11426	SMYD	http://www.genome.jp/dbget-bin/www_bget?ko:K11426
c32509_g1_i3	K11426	SMYD	http://www.genome.jp/dbget-bin/www_bget?ko:K11426
c32509_g1_i7	K11426	SMYD	http://www.genome.jp/dbget-bin/www_bget?ko:K11426
c32552_g1_i1	K09228	KRAB	http://www.genome.jp/dbget-bin/www_bget?ko:K09228
c32521_g1_i1	K08181	SLC16A4	http://www.genome.jp/dbget-bin/www_bget?ko:K08181
c32227_g2_i1	K03948	NDUFA4	http://www.genome.jp/dbget-bin/www_bget?ko:K03948	path:ko00190;path:ko01100;path:ko04932;path:ko05010;path:ko05012;path:ko05016
c33099_g1_i1	K15280	SLC35C2	http://www.genome.jp/dbget-bin/www_bget?ko:K15280
c33099_g3_i1	K00149	ALDH9A1	http://www.genome.jp/dbget-bin/www_bget?ko:K00149	path:ko00010;path:ko00053;path:ko00071;path:ko00280;path:ko00310;path:ko00330;path:ko00340;path:ko00380;path:ko00410;path:ko00561;path:ko00620;path:ko01100;path:ko01110;path:ko01120
c33099_g3_i2	K00149	ALDH9A1	http://www.genome.jp/dbget-bin/www_bget?ko:K00149	path:ko00010;path:ko00053;path:ko00071;path:ko00280;path:ko00310;path:ko00330;path:ko00340;path:ko00380;path:ko00410;path:ko00561;path:ko00620;path:ko01100;path:ko01110;path:ko01120
c33099_g3_i3	K00149	ALDH9A1	http://www.genome.jp/dbget-bin/www_bget?ko:K00149	path:ko00010;path:ko00053;path:ko00071;path:ko00280;path:ko00310;path:ko00330;path:ko00340;path:ko00380;path:ko00410;path:ko00561;path:ko00620;path:ko01100;path:ko01110;path:ko01120
c33099_g3_i5	K00149	ALDH9A1	http://www.genome.jp/dbget-bin/www_bget?ko:K00149	path:ko00010;path:ko00053;path:ko00071;path:ko00280;path:ko00310;path:ko00330;path:ko00340;path:ko00380;path:ko00410;path:ko00561;path:ko00620;path:ko01100;path:ko01110;path:ko01120
c32180_g1_i1	K17410	MRPS31	http://www.genome.jp/dbget-bin/www_bget?ko:K17410
c32419_g1_i1	K01392	THOP1	http://www.genome.jp/dbget-bin/www_bget?ko:K01392	path:ko04614;path:ko05143
c32419_g1_i2	K01392	THOP1	http://www.genome.jp/dbget-bin/www_bget?ko:K01392	path:ko04614;path:ko05143
c32851_g1_i1	K05691	CTNNA	http://www.genome.jp/dbget-bin/www_bget?ko:K05691	path:ko04390;path:ko04520;path:ko04530;path:ko04670;path:ko05100;path:ko05200;path:ko05213;path:ko05412
c32851_g1_i2	K05691	CTNNA	http://www.genome.jp/dbget-bin/www_bget?ko:K05691	path:ko04390;path:ko04520;path:ko04530;path:ko04670;path:ko05100;path:ko05200;path:ko05213;path:ko05412
c32416_g1_i1	K05674	ABCC10	http://www.genome.jp/dbget-bin/www_bget?ko:K05674	path:ko02010
c32402_g1_i1	K11424	WHSC1, MMSET, NSD2	http://www.genome.jp/dbget-bin/www_bget?ko:K11424	path:ko00310;path:ko05202
c32402_g1_i2	K11424	WHSC1, MMSET, NSD2	http://www.genome.jp/dbget-bin/www_bget?ko:K11424	path:ko00310;path:ko05202
c32881_g1_i1	K08735	MSH2	http://www.genome.jp/dbget-bin/www_bget?ko:K08735	path:ko03430;path:ko05200;path:ko05210
c32151_g1_i1	K16537	PCM1	http://www.genome.jp/dbget-bin/www_bget?ko:K16537
c32368_g1_i1	K08520	SEC22A_C	http://www.genome.jp/dbget-bin/www_bget?ko:K08520
c32806_g1_i1	K16804	DLGAP5, DLG7	http://www.genome.jp/dbget-bin/www_bget?ko:K16804
c32910_g1_i1	K04437	FLNA	http://www.genome.jp/dbget-bin/www_bget?ko:K04437	path:ko04010;path:ko04510;path:ko05132;path:ko05205
c32910_g1_i2	K04437	FLNA	http://www.genome.jp/dbget-bin/www_bget?ko:K04437	path:ko04010;path:ko04510;path:ko05132;path:ko05205
c32305_g1_i1	K00665	FASN	http://www.genome.jp/dbget-bin/www_bget?ko:K00665	path:ko00061;path:ko01100;path:ko01212;path:ko04152;path:ko04910
c32267_g2_i1	K04710	CERS	http://www.genome.jp/dbget-bin/www_bget?ko:K04710	path:ko00600;path:ko01100
c32267_g3_i1	K04710	CERS	http://www.genome.jp/dbget-bin/www_bget?ko:K04710	path:ko00600;path:ko01100
c32267_g3_i2	K04710	CERS	http://www.genome.jp/dbget-bin/www_bget?ko:K04710	path:ko00600;path:ko01100
c32834_g1_i1	K10838	XPC	http://www.genome.jp/dbget-bin/www_bget?ko:K10838	path:ko03420
c32834_g1_i2	K10838	XPC	http://www.genome.jp/dbget-bin/www_bget?ko:K10838	path:ko03420
c32429_g1_i1	K17908	WIPI, ATG18	http://www.genome.jp/dbget-bin/www_bget?ko:K17908
c32429_g1_i2	K17908	WIPI, ATG18	http://www.genome.jp/dbget-bin/www_bget?ko:K17908
c32429_g1_i3	K17908	WIPI, ATG18	http://www.genome.jp/dbget-bin/www_bget?ko:K17908
c32294_g1_i1	K14676	NTE, NRE	http://www.genome.jp/dbget-bin/www_bget?ko:K14676	path:ko00564
c33104_g1_i1	K08493	VTI1	http://www.genome.jp/dbget-bin/www_bget?ko:K08493	path:ko04130
c32565_g1_i1	K16734	SAC3D1, SHD1	http://www.genome.jp/dbget-bin/www_bget?ko:K16734
c32565_g1_i2	K16734	SAC3D1, SHD1	http://www.genome.jp/dbget-bin/www_bget?ko:K16734
c33069_g1_i1	K12171	SH3RF, POSH	http://www.genome.jp/dbget-bin/www_bget?ko:K12171
c33069_g1_i2	K12171	SH3RF, POSH	http://www.genome.jp/dbget-bin/www_bget?ko:K12171
c32183_g1_i1	K04676	SMAD1	http://www.genome.jp/dbget-bin/www_bget?ko:K04676	path:ko04350;path:ko04390;path:ko04391;path:ko05202
c33119_g1_i1	K15429	TRM5, TRMT5	http://www.genome.jp/dbget-bin/www_bget?ko:K15429
c32927_g1_i1	K14315	NDC1, TMEM48	http://www.genome.jp/dbget-bin/www_bget?ko:K14315	path:ko03013
c32520_g1_i1	K12504	PDSS1	http://www.genome.jp/dbget-bin/www_bget?ko:K12504	path:ko00900;path:ko01110
c32520_g1_i2	K12504	PDSS1	http://www.genome.jp/dbget-bin/www_bget?ko:K12504	path:ko00900;path:ko01110
c32816_g1_i1	K03364	CDH1	http://www.genome.jp/dbget-bin/www_bget?ko:K03364	path:ko04110;path:ko04111;path:ko04120;path:ko04914
c32381_g1_i1	K12471	EPN	http://www.genome.jp/dbget-bin/www_bget?ko:K12471	path:ko04144
c32381_g1_i2	K12471	EPN	http://www.genome.jp/dbget-bin/www_bget?ko:K12471	path:ko04144
c32381_g1_i3	K12471	EPN	http://www.genome.jp/dbget-bin/www_bget?ko:K12471	path:ko04144
c32381_g1_i4	K12471	EPN	http://www.genome.jp/dbget-bin/www_bget?ko:K12471	path:ko04144
c32381_g1_i5	K12471	EPN	http://www.genome.jp/dbget-bin/www_bget?ko:K12471	path:ko04144
c32381_g1_i6	K12471	EPN	http://www.genome.jp/dbget-bin/www_bget?ko:K12471	path:ko04144
c32611_g1_i1	K05702	AF6, MLLT4	http://www.genome.jp/dbget-bin/www_bget?ko:K05702	path:ko04014;path:ko04015;path:ko04024;path:ko04520;path:ko04530;path:ko04670
c32611_g1_i2	K05702	AF6, MLLT4	http://www.genome.jp/dbget-bin/www_bget?ko:K05702	path:ko04014;path:ko04015;path:ko04024;path:ko04520;path:ko04530;path:ko04670
c32611_g1_i3	K05702	AF6, MLLT4	http://www.genome.jp/dbget-bin/www_bget?ko:K05702	path:ko04014;path:ko04015;path:ko04024;path:ko04520;path:ko04530;path:ko04670
c32838_g2_i1	K13212	LUC7L2	http://www.genome.jp/dbget-bin/www_bget?ko:K13212
c32838_g2_i2	K13212	LUC7L2	http://www.genome.jp/dbget-bin/www_bget?ko:K13212
c32603_g1_i1	K17455	FSCN1_2	http://www.genome.jp/dbget-bin/www_bget?ko:K17455
c32603_g1_i2	K17455	FSCN1_2	http://www.genome.jp/dbget-bin/www_bget?ko:K17455
c32691_g2_i2	K15544	SSU72	http://www.genome.jp/dbget-bin/www_bget?ko:K15544	path:ko03015
c32691_g2_i4	K14561	IMP4	http://www.genome.jp/dbget-bin/www_bget?ko:K14561	path:ko03008
c32691_g2_i5	K14561	IMP4	http://www.genome.jp/dbget-bin/www_bget?ko:K14561	path:ko03008
c32691_g2_i6	K14561	IMP4	http://www.genome.jp/dbget-bin/www_bget?ko:K14561	path:ko03008
c32691_g2_i7	K14561	IMP4	http://www.genome.jp/dbget-bin/www_bget?ko:K14561	path:ko03008
c32691_g2_i10	K14561	IMP4	http://www.genome.jp/dbget-bin/www_bget?ko:K14561	path:ko03008
c32654_g1_i1	K07890	RAB21	http://www.genome.jp/dbget-bin/www_bget?ko:K07890
c32685_g1_i1	K14805	DDX24, MAK5	http://www.genome.jp/dbget-bin/www_bget?ko:K14805
c33030_g1_i1	K01681	ACO, acnA	http://www.genome.jp/dbget-bin/www_bget?ko:K01681	path:ko00020;path:ko00630;path:ko00720;path:ko01100;path:ko01110;path:ko01120;path:ko01200;path:ko01210;path:ko01230
c33030_g1_i2	K01681	ACO, acnA	http://www.genome.jp/dbget-bin/www_bget?ko:K01681	path:ko00020;path:ko00630;path:ko00720;path:ko01100;path:ko01110;path:ko01120;path:ko01200;path:ko01210;path:ko01230
c33030_g1_i3	K01681	ACO, acnA	http://www.genome.jp/dbget-bin/www_bget?ko:K01681	path:ko00020;path:ko00630;path:ko00720;path:ko01100;path:ko01110;path:ko01120;path:ko01200;path:ko01210;path:ko01230
c32362_g1_i1	K14677	ACY1	http://www.genome.jp/dbget-bin/www_bget?ko:K14677	path:ko00330;path:ko01100;path:ko01110;path:ko01210;path:ko01230
c32362_g1_i2	K14677	ACY1	http://www.genome.jp/dbget-bin/www_bget?ko:K14677	path:ko00330;path:ko01100;path:ko01110;path:ko01210;path:ko01230
c32362_g1_i3	K14677	ACY1	http://www.genome.jp/dbget-bin/www_bget?ko:K14677	path:ko00330;path:ko01100;path:ko01110;path:ko01210;path:ko01230
c32392_g1_i1	K01883	CARS, cysS	http://www.genome.jp/dbget-bin/www_bget?ko:K01883	path:ko00970
c32188_g2_i1	K10275	FBXL9, LRRC29	http://www.genome.jp/dbget-bin/www_bget?ko:K10275
c32188_g4_i1	K00228	CPOX, hemF	http://www.genome.jp/dbget-bin/www_bget?ko:K00228	path:ko00860;path:ko01100;path:ko01110
c32188_g4_i2	K00228	CPOX, hemF	http://www.genome.jp/dbget-bin/www_bget?ko:K00228	path:ko00860;path:ko01100;path:ko01110
c32188_g2_i2	K10275	FBXL9, LRRC29	http://www.genome.jp/dbget-bin/www_bget?ko:K10275
c32928_g1_i1	K12863	CWC15	http://www.genome.jp/dbget-bin/www_bget?ko:K12863	path:ko03040
c32492_g1_i1	K01551	arsA, ASNA1	http://www.genome.jp/dbget-bin/www_bget?ko:K01551
c32130_g1_i1	K06094	LLGL	http://www.genome.jp/dbget-bin/www_bget?ko:K06094	path:ko04390;path:ko04391;path:ko04530
c32130_g1_i2	K06094	LLGL	http://www.genome.jp/dbget-bin/www_bget?ko:K06094	path:ko04390;path:ko04391;path:ko04530
c32130_g1_i3	K06094	LLGL	http://www.genome.jp/dbget-bin/www_bget?ko:K06094	path:ko04390;path:ko04391;path:ko04530
c32865_g1_i1	K14536	RIA1	http://www.genome.jp/dbget-bin/www_bget?ko:K14536	path:ko03008
c32887_g1_i1	K10380	ANK	http://www.genome.jp/dbget-bin/www_bget?ko:K10380	path:ko05205
c32560_g1_i1	K15014	SLC29A1_2_3, ENT1_2_3	http://www.genome.jp/dbget-bin/www_bget?ko:K15014
c32560_g1_i2	K15014	SLC29A1_2_3, ENT1_2_3	http://www.genome.jp/dbget-bin/www_bget?ko:K15014
c32604_g1_i1	K14290	XPO1, CRM1	http://www.genome.jp/dbget-bin/www_bget?ko:K14290	path:ko03008;path:ko03013;path:ko05164;path:ko05166;path:ko05169
c32604_g1_i2	K14290	XPO1, CRM1	http://www.genome.jp/dbget-bin/www_bget?ko:K14290	path:ko03008;path:ko03013;path:ko05164;path:ko05166;path:ko05169
c32757_g1_i1	K14539	LSG1	http://www.genome.jp/dbget-bin/www_bget?ko:K14539	path:ko03008
c32790_g1_i1	K09291	TPR	http://www.genome.jp/dbget-bin/www_bget?ko:K09291	path:ko03013;path:ko04011;path:ko05200;path:ko05216
c32790_g1_i2	K09291	TPR	http://www.genome.jp/dbget-bin/www_bget?ko:K09291	path:ko03013;path:ko04011;path:ko05200;path:ko05216
c32998_g1_i1	K06115	SPTB	http://www.genome.jp/dbget-bin/www_bget?ko:K06115
c32998_g1_i3	K06115	SPTB	http://www.genome.jp/dbget-bin/www_bget?ko:K06115
c32998_g1_i4	K06115	SPTB	http://www.genome.jp/dbget-bin/www_bget?ko:K06115
c32845_g1_i1	K17916	KIF16B, SNX23	http://www.genome.jp/dbget-bin/www_bget?ko:K17916
c32363_g1_i1	K01847	MUT	http://www.genome.jp/dbget-bin/www_bget?ko:K01847	path:ko00280;path:ko00630;path:ko00640;path:ko00720;path:ko01100;path:ko01120;path:ko01200
c32363_g1_i2	K01847	MUT	http://www.genome.jp/dbget-bin/www_bget?ko:K01847	path:ko00280;path:ko00630;path:ko00640;path:ko00720;path:ko01100;path:ko01120;path:ko01200
c32687_g1_i1	K01866	YARS, tyrS	http://www.genome.jp/dbget-bin/www_bget?ko:K01866	path:ko00970
c32698_g2_i1	K10955	MUC2	http://www.genome.jp/dbget-bin/www_bget?ko:K10955	path:ko05110;path:ko05146
c32307_g2_i1	K10147	PPM1D, WIP1	http://www.genome.jp/dbget-bin/www_bget?ko:K10147	path:ko04115
c32307_g2_i2	K10147	PPM1D, WIP1	http://www.genome.jp/dbget-bin/www_bget?ko:K10147	path:ko04115
c32408_g1_i1	K08371	CYB561D2	http://www.genome.jp/dbget-bin/www_bget?ko:K08371
c32936_g1_i1	K12489	ACAP	http://www.genome.jp/dbget-bin/www_bget?ko:K12489	path:ko04144
c32936_g1_i2	K12489	ACAP	http://www.genome.jp/dbget-bin/www_bget?ko:K12489	path:ko04144
c32936_g1_i3	K12489	ACAP	http://www.genome.jp/dbget-bin/www_bget?ko:K12489	path:ko04144
c32936_g1_i4	K12489	ACAP	http://www.genome.jp/dbget-bin/www_bget?ko:K12489	path:ko04144
c32791_g1_i1	K05633	AIP5, WWP1	http://www.genome.jp/dbget-bin/www_bget?ko:K05633	path:ko04120;path:ko04144
c32379_g1_i1	K02677	CPKC	http://www.genome.jp/dbget-bin/www_bget?ko:K02677	path:ko04010;path:ko04011;path:ko04012;path:ko04014;path:ko04015;path:ko04020;path:ko04066;path:ko04070;path:ko04150;path:ko04270;path:ko04310;path:ko04370;path:ko04510;path:ko04530;path:ko04540;path:ko04650;path:ko04666;path:ko04670;path:ko04713;path:ko04720;path:ko04723;path:ko04724;path:ko04725;path:ko04726;path:ko04727;path:ko04728;path:ko04730;path:ko04745;path:ko04750;path:ko04911;path:ko04…
c32124_g1_i1	K13278	ASPG	http://www.genome.jp/dbget-bin/www_bget?ko:K13278
c32124_g1_i3	K13278	ASPG	http://www.genome.jp/dbget-bin/www_bget?ko:K13278
c32124_g1_i4	K13278	ASPG	http://www.genome.jp/dbget-bin/www_bget?ko:K13278
c32124_g1_i5	K13278	ASPG	http://www.genome.jp/dbget-bin/www_bget?ko:K13278
c32787_g1_i1	K08766	CPT2	http://www.genome.jp/dbget-bin/www_bget?ko:K08766	path:ko00071;path:ko01212;path:ko03320
c32877_g1_i1	K01634	E4.1.2.27	http://www.genome.jp/dbget-bin/www_bget?ko:K01634	path:ko00600;path:ko01100
c32877_g1_i2	K01634	E4.1.2.27	http://www.genome.jp/dbget-bin/www_bget?ko:K01634	path:ko00600;path:ko01100
c32738_g1_i1	K12405	HSD17B4	http://www.genome.jp/dbget-bin/www_bget?ko:K12405	path:ko00120;path:ko01100;path:ko04146
c32738_g1_i2	K12405	HSD17B4	http://www.genome.jp/dbget-bin/www_bget?ko:K12405	path:ko00120;path:ko01100;path:ko04146
c32776_g2_i1	K15047	HNRNPUL1, E1BAP5	http://www.genome.jp/dbget-bin/www_bget?ko:K15047	path:ko05164
c32776_g2_i2	K15047	HNRNPUL1, E1BAP5	http://www.genome.jp/dbget-bin/www_bget?ko:K15047	path:ko05164
c32810_g1_i1	K01968	E6.4.1.4A	http://www.genome.jp/dbget-bin/www_bget?ko:K01968	path:ko00280;path:ko01100
c32559_g1_i1	K14833	NOC2	http://www.genome.jp/dbget-bin/www_bget?ko:K14833
c32997_g1_i1	K09189	MLL5	http://www.genome.jp/dbget-bin/www_bget?ko:K09189	path:ko00310
c32997_g1_i2	K09189	MLL5	http://www.genome.jp/dbget-bin/www_bget?ko:K09189	path:ko00310
c32766_g1_i1	K10799	TNKS	http://www.genome.jp/dbget-bin/www_bget?ko:K10799
c32766_g1_i2	K10799	TNKS	http://www.genome.jp/dbget-bin/www_bget?ko:K10799
c32766_g1_i3	K10799	TNKS	http://www.genome.jp/dbget-bin/www_bget?ko:K10799
c32422_g1_i1	K00927	PGK, pgk	http://www.genome.jp/dbget-bin/www_bget?ko:K00927	path:ko00010;path:ko00710;path:ko01100;path:ko01110;path:ko01120;path:ko01200;path:ko01230
c32250_g1_i1	K13348	MPV17	http://www.genome.jp/dbget-bin/www_bget?ko:K13348	path:ko04146
c32250_g1_i2	K13348	MPV17	http://www.genome.jp/dbget-bin/www_bget?ko:K13348	path:ko04146
c32707_g1_i1	K14391	SLC5A11, SMIT2, SGLT6	http://www.genome.jp/dbget-bin/www_bget?ko:K14391
c32541_g1_i1	K13145	INTS8	http://www.genome.jp/dbget-bin/www_bget?ko:K13145
c32175_g1_i1	K04556	PARK2	http://www.genome.jp/dbget-bin/www_bget?ko:K04556	path:ko04120;path:ko04141;path:ko05012
c32923_g1_i1	K08673	PCSK7	http://www.genome.jp/dbget-bin/www_bget?ko:K08673
c32483_g1_i1	K11135	PINX1	http://www.genome.jp/dbget-bin/www_bget?ko:K11135
c32759_g1_i1	K17284	PLIN2, ADRP	http://www.genome.jp/dbget-bin/www_bget?ko:K17284
c32234_g1_i1	K11863	ATXN3, MJD	http://www.genome.jp/dbget-bin/www_bget?ko:K11863	path:ko04141
c32234_g1_i2	K11863	ATXN3, MJD	http://www.genome.jp/dbget-bin/www_bget?ko:K11863	path:ko04141
c32286_g1_i1	K13173	ARGLU1	http://www.genome.jp/dbget-bin/www_bget?ko:K13173
c32286_g1_i2	K13173	ARGLU1	http://www.genome.jp/dbget-bin/www_bget?ko:K13173
c32286_g1_i3	K13173	ARGLU1	http://www.genome.jp/dbget-bin/www_bget?ko:K13173
c32686_g1_i1	K09562	HSPBP1	http://www.genome.jp/dbget-bin/www_bget?ko:K09562	path:ko04141
c32920_g1_i2	K08065	NFYB	http://www.genome.jp/dbget-bin/www_bget?ko:K08065	path:ko04612;path:ko05152;path:ko05166
c32920_g1_i5	K08065	NFYB	http://www.genome.jp/dbget-bin/www_bget?ko:K08065	path:ko04612;path:ko05152;path:ko05166
c32920_g1_i6	K08065	NFYB	http://www.genome.jp/dbget-bin/www_bget?ko:K08065	path:ko04612;path:ko05152;path:ko05166
c32920_g1_i7	K08065	NFYB	http://www.genome.jp/dbget-bin/www_bget?ko:K08065	path:ko04612;path:ko05152;path:ko05166
c32320_g1_i1	K05236	COPA	http://www.genome.jp/dbget-bin/www_bget?ko:K05236	path:ko04080
c32320_g1_i2	K05236	COPA	http://www.genome.jp/dbget-bin/www_bget?ko:K05236	path:ko04080
c32587_g1_i1	K03593	mrp	http://www.genome.jp/dbget-bin/www_bget?ko:K03593
c32587_g1_i2	K03593	mrp	http://www.genome.jp/dbget-bin/www_bget?ko:K03593
c32287_g1_i1	K10084	EDEM1	http://www.genome.jp/dbget-bin/www_bget?ko:K10084	path:ko04141
c32287_g1_i2	K10084	EDEM1	http://www.genome.jp/dbget-bin/www_bget?ko:K10084	path:ko04141
c32196_g1_i1	K02350	POLZ1, rev3	http://www.genome.jp/dbget-bin/www_bget?ko:K02350	path:ko01100;path:ko03460
c32196_g1_i2	K02350	POLZ1, rev3	http://www.genome.jp/dbget-bin/www_bget?ko:K02350	path:ko01100;path:ko03460
c32196_g1_i3	K02350	POLZ1, rev3	http://www.genome.jp/dbget-bin/www_bget?ko:K02350	path:ko01100;path:ko03460
c32649_g1_i1	K09228	KRAB	http://www.genome.jp/dbget-bin/www_bget?ko:K09228
c32589_g1_i1	K06276	PDPK1	http://www.genome.jp/dbget-bin/www_bget?ko:K06276	path:ko03320;path:ko04068;path:ko04150;path:ko04151;path:ko04152;path:ko04510;path:ko04660;path:ko04664;path:ko04722;path:ko04910;path:ko04919;path:ko04960;path:ko05145;path:ko05160;path:ko05205;path:ko05213;path:ko05215;path:ko05223
c32455_g1_i1	K17197	NKIRAS	http://www.genome.jp/dbget-bin/www_bget?ko:K17197
c32129_g1_i1	K00306	PIPOX	http://www.genome.jp/dbget-bin/www_bget?ko:K00306	path:ko00260;path:ko00310;path:ko01100;path:ko04146
c32403_g1_i1	K08334	BECN1, VPS30, ATG6	http://www.genome.jp/dbget-bin/www_bget?ko:K08334	path:ko04140
c32548_g1_i1	K15259	PARP7S	http://www.genome.jp/dbget-bin/www_bget?ko:K15259
c32548_g1_i2	K15259	PARP7S	http://www.genome.jp/dbget-bin/www_bget?ko:K15259
c32181_g1_i1	K14558	PWP2, UTP1	http://www.genome.jp/dbget-bin/www_bget?ko:K14558	path:ko03008
c32268_g1_i1	K14165	K14165	http://www.genome.jp/dbget-bin/www_bget?ko:K14165
c32268_g1_i2	K14165	K14165	http://www.genome.jp/dbget-bin/www_bget?ko:K14165
c32268_g1_i3	K14165	K14165	http://www.genome.jp/dbget-bin/www_bget?ko:K14165
c32452_g1_i1	K12309	GLB1, ELNR1	http://www.genome.jp/dbget-bin/www_bget?ko:K12309	path:ko00052;path:ko00511;path:ko00531;path:ko00600;path:ko00604;path:ko01100;path:ko04142
c32785_g1_i1	K10599	PRPF19, PRP19	http://www.genome.jp/dbget-bin/www_bget?ko:K10599	path:ko03040;path:ko04120
c32421_g1_i1	K12353	SMPD4	http://www.genome.jp/dbget-bin/www_bget?ko:K12353	path:ko00600;path:ko01100
c32421_g1_i2	K12353	SMPD4	http://www.genome.jp/dbget-bin/www_bget?ko:K12353	path:ko00600;path:ko01100
c32349_g1_i1	K08876	SCYL1	http://www.genome.jp/dbget-bin/www_bget?ko:K08876
c32122_g1_i1	K17388	ROCK2	http://www.genome.jp/dbget-bin/www_bget?ko:K17388	path:ko04022;path:ko04024;path:ko04062;path:ko04270;path:ko04310;path:ko04360;path:ko04510;path:ko04611;path:ko04670;path:ko04810;path:ko04921;path:ko05130;path:ko05131;path:ko05132;path:ko05205
c32530_g1_i1	K14809	DDX55, SPB4	http://www.genome.jp/dbget-bin/www_bget?ko:K14809
c32530_g2_i1	K12597	AIR1_2	http://www.genome.jp/dbget-bin/www_bget?ko:K12597	path:ko03018
c32530_g2_i3	K12597	AIR1_2	http://www.genome.jp/dbget-bin/www_bget?ko:K12597	path:ko03018
c32434_g1_i1	K15456	KTI12	http://www.genome.jp/dbget-bin/www_bget?ko:K15456
c32207_g1_i1	K18086	MTMR14	http://www.genome.jp/dbget-bin/www_bget?ko:K18086
c32207_g1_i2	K18086	MTMR14	http://www.genome.jp/dbget-bin/www_bget?ko:K18086
c33052_g1_i1	K07963	TRIM23, ARFD1	http://www.genome.jp/dbget-bin/www_bget?ko:K07963
c32647_g1_i1	K13091	RBM39, RNPC2	http://www.genome.jp/dbget-bin/www_bget?ko:K13091
c32647_g1_i3	K13091	RBM39, RNPC2	http://www.genome.jp/dbget-bin/www_bget?ko:K13091
c32647_g1_i4	K13091	RBM39, RNPC2	http://www.genome.jp/dbget-bin/www_bget?ko:K13091
c32647_g1_i5	K13091	RBM39, RNPC2	http://www.genome.jp/dbget-bin/www_bget?ko:K13091
c32647_g1_i6	K13091	RBM39, RNPC2	http://www.genome.jp/dbget-bin/www_bget?ko:K13091
c32647_g1_i7	K13091	RBM39, RNPC2	http://www.genome.jp/dbget-bin/www_bget?ko:K13091
c32647_g2_i1	K10407	KLC	http://www.genome.jp/dbget-bin/www_bget?ko:K10407	path:ko05132
c32647_g2_i2	K10407	KLC	http://www.genome.jp/dbget-bin/www_bget?ko:K10407	path:ko05132
c32647_g2_i3	K10407	KLC	http://www.genome.jp/dbget-bin/www_bget?ko:K10407	path:ko05132
c32647_g2_i4	K10407	KLC	http://www.genome.jp/dbget-bin/www_bget?ko:K10407	path:ko05132
c32647_g2_i5	K10407	KLC	http://www.genome.jp/dbget-bin/www_bget?ko:K10407	path:ko05132
c32647_g2_i6	K10407	KLC	http://www.genome.jp/dbget-bin/www_bget?ko:K10407	path:ko05132
c32647_g2_i8	K10407	KLC	http://www.genome.jp/dbget-bin/www_bget?ko:K10407	path:ko05132
c32317_g1_i1	K07197	SREBP1, SREBF1	http://www.genome.jp/dbget-bin/www_bget?ko:K07197	path:ko04152;path:ko04910;path:ko04932
c32871_g2_i1	K09193	SP3	http://www.genome.jp/dbget-bin/www_bget?ko:K09193
c32871_g4_i1	K04500	SMAD2_3	http://www.genome.jp/dbget-bin/www_bget?ko:K04500	path:ko04068;path:ko04110;path:ko04144;path:ko04350;path:ko04390;path:ko04520;path:ko05142;path:ko05166;path:ko05200;path:ko05210;path:ko05212;path:ko05321
c32871_g2_i2	K09193	SP3	http://www.genome.jp/dbget-bin/www_bget?ko:K09193
c32871_g7_i1	K04500	SMAD2_3	http://www.genome.jp/dbget-bin/www_bget?ko:K04500	path:ko04068;path:ko04110;path:ko04144;path:ko04350;path:ko04390;path:ko04520;path:ko05142;path:ko05166;path:ko05200;path:ko05210;path:ko05212;path:ko05321
c32371_g1_i1	K14137	PTAR1	http://www.genome.jp/dbget-bin/www_bget?ko:K14137
c32371_g1_i2	K14137	PTAR1	http://www.genome.jp/dbget-bin/www_bget?ko:K14137
c32813_g2_i1	K11855	USP36_42	http://www.genome.jp/dbget-bin/www_bget?ko:K11855
c32259_g1_i1	K04441	P38	http://www.genome.jp/dbget-bin/www_bget?ko:K04441	path:ko04010;path:ko04011;path:ko04015;path:ko04068;path:ko04261;path:ko04370;path:ko04380;path:ko04611;path:ko04620;path:ko04621;path:ko04622;path:ko04660;path:ko04664;path:ko04668;path:ko04670;path:ko04722;path:ko04723;path:ko04728;path:ko04750;path:ko04912;path:ko04914;path:ko04917;path:ko05014;path:ko05120;path:ko05131;path:ko05132;path:ko05133;path:ko05140;path:ko05142;path:ko05145;path:ko05…
c32818_g1_i1	K15720	N4BP2	http://www.genome.jp/dbget-bin/www_bget?ko:K15720
c32462_g1_i1	K09237	K09237	http://www.genome.jp/dbget-bin/www_bget?ko:K09237
c32972_g1_i1	K06508	CD81, TAPA1, TSPAN28	http://www.genome.jp/dbget-bin/www_bget?ko:K06508	path:ko04662;path:ko05144;path:ko05160
c32147_g1_i1	K14213	PEPD	http://www.genome.jp/dbget-bin/www_bget?ko:K14213
c32147_g1_i2	K14213	PEPD	http://www.genome.jp/dbget-bin/www_bget?ko:K14213
c32147_g1_i3	K14213	PEPD	http://www.genome.jp/dbget-bin/www_bget?ko:K14213
c32147_g1_i4	K14213	PEPD	http://www.genome.jp/dbget-bin/www_bget?ko:K14213
c32489_g1_i2	K03871	VHL	http://www.genome.jp/dbget-bin/www_bget?ko:K03871	path:ko04066;path:ko04120;path:ko05200;path:ko05211
c32436_g1_i2	K11584	PPP2R5	http://www.genome.jp/dbget-bin/www_bget?ko:K11584	path:ko03015;path:ko04113;path:ko04114;path:ko04151;path:ko04152;path:ko04261;path:ko04728
c32830_g1_i1	K03036	PSMD11, RPN6	http://www.genome.jp/dbget-bin/www_bget?ko:K03036	path:ko03050;path:ko05169
c32731_g1_i2	K10380	ANK	http://www.genome.jp/dbget-bin/www_bget?ko:K10380	path:ko05205
c32731_g1_i4	K10380	ANK	http://www.genome.jp/dbget-bin/www_bget?ko:K10380	path:ko05205
c32731_g1_i5	K10380	ANK	http://www.genome.jp/dbget-bin/www_bget?ko:K10380	path:ko05205
c32731_g1_i6	K10380	ANK	http://www.genome.jp/dbget-bin/www_bget?ko:K10380	path:ko05205
c32731_g1_i8	K10380	ANK	http://www.genome.jp/dbget-bin/www_bget?ko:K10380	path:ko05205
c32731_g1_i10	K10380	ANK	http://www.genome.jp/dbget-bin/www_bget?ko:K10380	path:ko05205
c32876_g1_i1	K09389	E2F2	http://www.genome.jp/dbget-bin/www_bget?ko:K09389	path:ko04110;path:ko05161;path:ko05166;path:ko05200;path:ko05206;path:ko05212;path:ko05214;path:ko05215;path:ko05218;path:ko05219;path:ko05220;path:ko05222;path:ko05223
c32876_g1_i2	K09389	E2F2	http://www.genome.jp/dbget-bin/www_bget?ko:K09389	path:ko04110;path:ko05161;path:ko05166;path:ko05200;path:ko05206;path:ko05212;path:ko05214;path:ko05215;path:ko05218;path:ko05219;path:ko05220;path:ko05222;path:ko05223
c32206_g1_i1	K15216	RRN3, TIFIA	http://www.genome.jp/dbget-bin/www_bget?ko:K15216
c32564_g1_i1	K09228	KRAB	http://www.genome.jp/dbget-bin/www_bget?ko:K09228
c32947_g1_i1	K11273	DDX11, CHL1, CTF1	http://www.genome.jp/dbget-bin/www_bget?ko:K11273
c32961_g1_i1	K13172	SRRM2, SRM300	http://www.genome.jp/dbget-bin/www_bget?ko:K13172
c32961_g1_i2	K13172	SRRM2, SRM300	http://www.genome.jp/dbget-bin/www_bget?ko:K13172
c33103_g1_i2	K09228	KRAB	http://www.genome.jp/dbget-bin/www_bget?ko:K09228
c33103_g1_i3	K09228	KRAB	http://www.genome.jp/dbget-bin/www_bget?ko:K09228
c32709_g1_i1	K17685	CYP2A13	http://www.genome.jp/dbget-bin/www_bget?ko:K17685	path:ko00980;path:ko05204
c32709_g1_i2	K17685	CYP2A13	http://www.genome.jp/dbget-bin/www_bget?ko:K17685	path:ko00980;path:ko05204
c32709_g1_i3	K17854	CYP2K	http://www.genome.jp/dbget-bin/www_bget?ko:K17854
c32709_g1_i4	K17854	CYP2K	http://www.genome.jp/dbget-bin/www_bget?ko:K17854
c32709_g1_i5	K17685	CYP2A13	http://www.genome.jp/dbget-bin/www_bget?ko:K17685	path:ko00980;path:ko05204
c32709_g1_i6	K17685	CYP2A13	http://www.genome.jp/dbget-bin/www_bget?ko:K17685	path:ko00980;path:ko05204
c32709_g1_i7	K17854	CYP2K	http://www.genome.jp/dbget-bin/www_bget?ko:K17854
c32709_g1_i8	K17685	CYP2A13	http://www.genome.jp/dbget-bin/www_bget?ko:K17685	path:ko00980;path:ko05204
c32709_g2_i1	K07419	CYP2R1	http://www.genome.jp/dbget-bin/www_bget?ko:K07419	path:ko00100;path:ko01100
c32709_g1_i9	K17854	CYP2K	http://www.genome.jp/dbget-bin/www_bget?ko:K17854
c32701_g1_i1	K10812	GlcAT-SP	http://www.genome.jp/dbget-bin/www_bget?ko:K10812
c32701_g1_i2	K10812	GlcAT-SP	http://www.genome.jp/dbget-bin/www_bget?ko:K10812
c32701_g1_i3	K10812	GlcAT-SP	http://www.genome.jp/dbget-bin/www_bget?ko:K10812
c32751_g1_i1	K11138	K11138, RIF1	http://www.genome.jp/dbget-bin/www_bget?ko:K11138
c32071_g1_i1	K11418	HDAC11	http://www.genome.jp/dbget-bin/www_bget?ko:K11418	path:ko05034;path:ko05203
c32071_g1_i2	K15707	RNF170	http://www.genome.jp/dbget-bin/www_bget?ko:K15707
c32071_g1_i7	K11418	HDAC11	http://www.genome.jp/dbget-bin/www_bget?ko:K11418	path:ko05034;path:ko05203
c32071_g1_i8	K15707	RNF170	http://www.genome.jp/dbget-bin/www_bget?ko:K15707
c32773_g1_i1	K09228	KRAB	http://www.genome.jp/dbget-bin/www_bget?ko:K09228
c32773_g1_i2	K09228	KRAB	http://www.genome.jp/dbget-bin/www_bget?ko:K09228
c32901_g1_i1	K00868	pdxK, pdxY	http://www.genome.jp/dbget-bin/www_bget?ko:K00868	path:ko00750;path:ko01100
c32901_g1_i2	K00868	pdxK, pdxY	http://www.genome.jp/dbget-bin/www_bget?ko:K00868	path:ko00750;path:ko01100
c32901_g1_i3	K00868	pdxK, pdxY	http://www.genome.jp/dbget-bin/www_bget?ko:K00868	path:ko00750;path:ko01100
c33097_g1_i1	K00814	GPT, ALT	http://www.genome.jp/dbget-bin/www_bget?ko:K00814	path:ko00250;path:ko00710;path:ko01100;path:ko01120;path:ko01200;path:ko01210;path:ko01230
c32847_g1_i1	K00254	DHODH, pyrD	http://www.genome.jp/dbget-bin/www_bget?ko:K00254	path:ko00240;path:ko01100
c32847_g1_i2	K00254	DHODH, pyrD	http://www.genome.jp/dbget-bin/www_bget?ko:K00254	path:ko00240;path:ko01100
c32916_g1_i1	K06237	COL4A	http://www.genome.jp/dbget-bin/www_bget?ko:K06237	path:ko04151;path:ko04510;path:ko04512;path:ko04974;path:ko05146;path:ko05200;path:ko05222
c32367_g1_i1	K17493	CAMSAP	http://www.genome.jp/dbget-bin/www_bget?ko:K17493
c32367_g1_i2	K17493	CAMSAP	http://www.genome.jp/dbget-bin/www_bget?ko:K17493
c32367_g1_i3	K17493	CAMSAP	http://www.genome.jp/dbget-bin/www_bget?ko:K17493
c32689_g1_i1	K14317	NUP214, CAN	http://www.genome.jp/dbget-bin/www_bget?ko:K14317	path:ko03013;path:ko05169
c32937_g1_i1	K02216	CHK1	http://www.genome.jp/dbget-bin/www_bget?ko:K02216	path:ko04110;path:ko04111;path:ko04113;path:ko04115;path:ko05166;path:ko05203
c32622_g1_i1	K02605	ORC3	http://www.genome.jp/dbget-bin/www_bget?ko:K02605	path:ko04110;path:ko04111;path:ko04113
c32694_g1_i1	K09263	MEF2N	http://www.genome.jp/dbget-bin/www_bget?ko:K09263
c32694_g1_i2	K09263	MEF2N	http://www.genome.jp/dbget-bin/www_bget?ko:K09263
c32694_g1_i3	K09263	MEF2N	http://www.genome.jp/dbget-bin/www_bget?ko:K09263
c32476_g1_i1	K08517	SEC22	http://www.genome.jp/dbget-bin/www_bget?ko:K08517	path:ko04130;path:ko04145;path:ko05134
c32737_g1_i1	K05039	SLC6A6S	http://www.genome.jp/dbget-bin/www_bget?ko:K05039
c32737_g1_i2	K05039	SLC6A6S	http://www.genome.jp/dbget-bin/www_bget?ko:K05039
c32737_g1_i3	K05039	SLC6A6S	http://www.genome.jp/dbget-bin/www_bget?ko:K05039
c32737_g1_i4	K05039	SLC6A6S	http://www.genome.jp/dbget-bin/www_bget?ko:K05039
c32943_g1_i1	K13280	SEC11, sipW	http://www.genome.jp/dbget-bin/www_bget?ko:K13280	path:ko03060
c32959_g1_i1	K10950	ERO1L	http://www.genome.jp/dbget-bin/www_bget?ko:K10950	path:ko04141;path:ko05110
c32597_g1_i1	K09228	KRAB	http://www.genome.jp/dbget-bin/www_bget?ko:K09228
c32827_g1_i2	K00666	K00666	http://www.genome.jp/dbget-bin/www_bget?ko:K00666
c32475_g1_i1	K16542	CDK5RAP2	http://www.genome.jp/dbget-bin/www_bget?ko:K16542
c32475_g1_i2	K16542	CDK5RAP2	http://www.genome.jp/dbget-bin/www_bget?ko:K16542
c32475_g1_i3	K16542	CDK5RAP2	http://www.genome.jp/dbget-bin/www_bget?ko:K16542
c32839_g1_i1	K10849	ERCC1	http://www.genome.jp/dbget-bin/www_bget?ko:K10849	path:ko03420;path:ko03460
c32839_g1_i2	K10849	ERCC1	http://www.genome.jp/dbget-bin/www_bget?ko:K10849	path:ko03420;path:ko03460
c32839_g1_i3	K10849	ERCC1	http://www.genome.jp/dbget-bin/www_bget?ko:K10849	path:ko03420;path:ko03460
c32839_g1_i4	K10849	ERCC1	http://www.genome.jp/dbget-bin/www_bget?ko:K10849	path:ko03420;path:ko03460
c32839_g1_i5	K10849	ERCC1	http://www.genome.jp/dbget-bin/www_bget?ko:K10849	path:ko03420;path:ko03460
c32644_g1_i1	K13806	DAGL	http://www.genome.jp/dbget-bin/www_bget?ko:K13806	path:ko04723;path:ko04745
c32313_g2_i2	K18038	PTPN9, MEG2	http://www.genome.jp/dbget-bin/www_bget?ko:K18038
c32313_g2_i3	K18038	PTPN9, MEG2	http://www.genome.jp/dbget-bin/www_bget?ko:K18038
c32313_g2_i5	K18038	PTPN9, MEG2	http://www.genome.jp/dbget-bin/www_bget?ko:K18038
c32650_g1_i1	K07190	PHKA_B	http://www.genome.jp/dbget-bin/www_bget?ko:K07190	path:ko04020;path:ko04910
c32650_g1_i2	K07190	PHKA_B	http://www.genome.jp/dbget-bin/www_bget?ko:K07190	path:ko04020;path:ko04910
c32650_g1_i3	K07190	PHKA_B	http://www.genome.jp/dbget-bin/www_bget?ko:K07190	path:ko04020;path:ko04910
c32650_g2_i1	K07190	PHKA_B	http://www.genome.jp/dbget-bin/www_bget?ko:K07190	path:ko04020;path:ko04910
c32650_g2_i2	K07190	PHKA_B	http://www.genome.jp/dbget-bin/www_bget?ko:K07190	path:ko04020;path:ko04910
c32777_g1_i1	K17540	TEX14, SGK307	http://www.genome.jp/dbget-bin/www_bget?ko:K17540
c32777_g1_i2	K17540	TEX14, SGK307	http://www.genome.jp/dbget-bin/www_bget?ko:K17540
c32467_g1_i1	K11757	PBRM1, PB1	http://www.genome.jp/dbget-bin/www_bget?ko:K11757
c32467_g1_i2	K11757	PBRM1, PB1	http://www.genome.jp/dbget-bin/www_bget?ko:K11757
c32467_g1_i3	K11757	PBRM1, PB1	http://www.genome.jp/dbget-bin/www_bget?ko:K11757
c32956_g1_i2	K16860	PLD3_4	http://www.genome.jp/dbget-bin/www_bget?ko:K16860	path:ko00564;path:ko00565;path:ko01100
c32956_g1_i4	K16860	PLD3_4	http://www.genome.jp/dbget-bin/www_bget?ko:K16860	path:ko00564;path:ko00565;path:ko01100
c32185_g1_i1	K08492	STX18	http://www.genome.jp/dbget-bin/www_bget?ko:K08492	path:ko04130;path:ko04145
c32185_g1_i2	K08492	STX18	http://www.genome.jp/dbget-bin/www_bget?ko:K08492	path:ko04130;path:ko04145
c32185_g1_i3	K08492	STX18	http://www.genome.jp/dbget-bin/www_bget?ko:K08492	path:ko04130;path:ko04145
c33037_g1_i1	K00121	frmA, ADH5, adhC	http://www.genome.jp/dbget-bin/www_bget?ko:K00121	path:ko00010;path:ko00071;path:ko00350;path:ko00625;path:ko00626;path:ko00680;path:ko00830;path:ko00980;path:ko00982;path:ko01100;path:ko01110;path:ko01120;path:ko01200;path:ko01220;path:ko05204
c32735_g1_i1	K10610	DDB1	http://www.genome.jp/dbget-bin/www_bget?ko:K10610	path:ko03420;path:ko04120;path:ko05161;path:ko05203
c33086_g1_i1	K12391	AP1G1	http://www.genome.jp/dbget-bin/www_bget?ko:K12391	path:ko04142
c33086_g1_i2	K12391	AP1G1	http://www.genome.jp/dbget-bin/www_bget?ko:K12391	path:ko04142
c33086_g1_i3	K12391	AP1G1	http://www.genome.jp/dbget-bin/www_bget?ko:K12391	path:ko04142
c32779_g1_i1	K04237	PARD3	http://www.genome.jp/dbget-bin/www_bget?ko:K04237	path:ko04015;path:ko04062;path:ko04080;path:ko04144;path:ko04390;path:ko04391;path:ko04520;path:ko04530
c32779_g1_i2	K04237	PARD3	http://www.genome.jp/dbget-bin/www_bget?ko:K04237	path:ko04015;path:ko04062;path:ko04080;path:ko04144;path:ko04390;path:ko04391;path:ko04520;path:ko04530
c32779_g1_i3	K04237	PARD3	http://www.genome.jp/dbget-bin/www_bget?ko:K04237	path:ko04015;path:ko04062;path:ko04080;path:ko04144;path:ko04390;path:ko04391;path:ko04520;path:ko04530
c32779_g1_i4	K04237	PARD3	http://www.genome.jp/dbget-bin/www_bget?ko:K04237	path:ko04015;path:ko04062;path:ko04080;path:ko04144;path:ko04390;path:ko04391;path:ko04520;path:ko04530
c32779_g1_i5	K04237	PARD3	http://www.genome.jp/dbget-bin/www_bget?ko:K04237	path:ko04015;path:ko04062;path:ko04080;path:ko04144;path:ko04390;path:ko04391;path:ko04520;path:ko04530
c32779_g1_i6	K04237	PARD3	http://www.genome.jp/dbget-bin/www_bget?ko:K04237	path:ko04015;path:ko04062;path:ko04080;path:ko04144;path:ko04390;path:ko04391;path:ko04520;path:ko04530
c32779_g1_i7	K04237	PARD3	http://www.genome.jp/dbget-bin/www_bget?ko:K04237	path:ko04015;path:ko04062;path:ko04080;path:ko04144;path:ko04390;path:ko04391;path:ko04520;path:ko04530
c32779_g1_i8	K04237	PARD3	http://www.genome.jp/dbget-bin/www_bget?ko:K04237	path:ko04015;path:ko04062;path:ko04080;path:ko04144;path:ko04390;path:ko04391;path:ko04520;path:ko04530
c32779_g1_i9	K04237	PARD3	http://www.genome.jp/dbget-bin/www_bget?ko:K04237	path:ko04015;path:ko04062;path:ko04080;path:ko04144;path:ko04390;path:ko04391;path:ko04520;path:ko04530
c32779_g1_i10	K04237	PARD3	http://www.genome.jp/dbget-bin/www_bget?ko:K04237	path:ko04015;path:ko04062;path:ko04080;path:ko04144;path:ko04390;path:ko04391;path:ko04520;path:ko04530
c33068_g1_i1	K11366	USP22_27_51, UBP8	http://www.genome.jp/dbget-bin/www_bget?ko:K11366
c32285_g1_i2	K00901	E2.7.1.107, DGK, dgkA	http://www.genome.jp/dbget-bin/www_bget?ko:K00901	path:ko00561;path:ko00564;path:ko01100;path:ko04070
c32285_g1_i3	K00901	E2.7.1.107, DGK, dgkA	http://www.genome.jp/dbget-bin/www_bget?ko:K00901	path:ko00561;path:ko00564;path:ko01100;path:ko04070
c32285_g1_i4	K00901	E2.7.1.107, DGK, dgkA	http://www.genome.jp/dbget-bin/www_bget?ko:K00901	path:ko00561;path:ko00564;path:ko01100;path:ko04070
c32606_g1_i1	K04911	KCNH8	http://www.genome.jp/dbget-bin/www_bget?ko:K04911
c32606_g1_i4	K04911	KCNH8	http://www.genome.jp/dbget-bin/www_bget?ko:K04911
c33078_g1_i1	K01698	hemB, ALAD	http://www.genome.jp/dbget-bin/www_bget?ko:K01698	path:ko00860;path:ko01100;path:ko01110
c33078_g1_i2	K01698	hemB, ALAD	http://www.genome.jp/dbget-bin/www_bget?ko:K01698	path:ko00860;path:ko01100;path:ko01110
c32610_g1_i1	K04255	OPN4, Rh2_7	http://www.genome.jp/dbget-bin/www_bget?ko:K04255
c32610_g1_i2	K04255	OPN4, Rh2_7	http://www.genome.jp/dbget-bin/www_bget?ko:K04255
c32350_g1_i1	K10308	FBXO31	http://www.genome.jp/dbget-bin/www_bget?ko:K10308
c32350_g1_i2	K10308	FBXO31	http://www.genome.jp/dbget-bin/www_bget?ko:K10308
c32350_g1_i3	K10308	FBXO31	http://www.genome.jp/dbget-bin/www_bget?ko:K10308
c32479_g1_i1	K10727	CDT1	http://www.genome.jp/dbget-bin/www_bget?ko:K10727
c32917_g1_i1	K12015	TRIM39	http://www.genome.jp/dbget-bin/www_bget?ko:K12015
c32550_g1_i1	K04648	DCTN1	http://www.genome.jp/dbget-bin/www_bget?ko:K04648	path:ko04962;path:ko05016
c32550_g1_i2	K04648	DCTN1	http://www.genome.jp/dbget-bin/www_bget?ko:K04648	path:ko04962;path:ko05016
c32039_g1_i1	K08018	RAPGEF2, PDZGEF1	http://www.genome.jp/dbget-bin/www_bget?ko:K08018	path:ko04010;path:ko04015
c32039_g1_i2	K08018	RAPGEF2, PDZGEF1	http://www.genome.jp/dbget-bin/www_bget?ko:K08018	path:ko04010;path:ko04015
c32039_g2_i1	K08018	RAPGEF2, PDZGEF1	http://www.genome.jp/dbget-bin/www_bget?ko:K08018	path:ko04010;path:ko04015
c32137_g1_i1	K05636	LAMB1	http://www.genome.jp/dbget-bin/www_bget?ko:K05636	path:ko04151;path:ko04510;path:ko04512;path:ko05145;path:ko05146;path:ko05200;path:ko05222
c32257_g1_i1	K07199	PRKAB	http://www.genome.jp/dbget-bin/www_bget?ko:K07199	path:ko04068;path:ko04152;path:ko04710;path:ko04910;path:ko04920;path:ko04921;path:ko04932;path:ko05410
c32257_g1_i3	K07199	PRKAB	http://www.genome.jp/dbget-bin/www_bget?ko:K07199	path:ko04068;path:ko04152;path:ko04710;path:ko04910;path:ko04920;path:ko04921;path:ko04932;path:ko05410
c32873_g1_i1	K00710	GALNT	http://www.genome.jp/dbget-bin/www_bget?ko:K00710	path:ko00512;path:ko01100
c32873_g1_i2	K00710	GALNT	http://www.genome.jp/dbget-bin/www_bget?ko:K00710	path:ko00512;path:ko01100
c32616_g1_i1	K03850	ALG10	http://www.genome.jp/dbget-bin/www_bget?ko:K03850	path:ko00510;path:ko01100
c32344_g1_i1	K05628	RERE	http://www.genome.jp/dbget-bin/www_bget?ko:K05628	path:ko04391
c32344_g2_i1	K03639	MOCS1, moaA	http://www.genome.jp/dbget-bin/www_bget?ko:K03639	path:ko00790;path:ko01100;path:ko04122
c32344_g1_i2	K05628	RERE	http://www.genome.jp/dbget-bin/www_bget?ko:K05628	path:ko04391
c32344_g2_i2	K03639	MOCS1, moaA	http://www.genome.jp/dbget-bin/www_bget?ko:K03639	path:ko00790;path:ko01100;path:ko04122
c32344_g1_i3	K05628	RERE	http://www.genome.jp/dbget-bin/www_bget?ko:K05628	path:ko04391
c33003_g1_i1	K10420	DYNLT	http://www.genome.jp/dbget-bin/www_bget?ko:K10420
c32524_g1_i1	K16578	CLASP1_2	http://www.genome.jp/dbget-bin/www_bget?ko:K16578
c32524_g1_i2	K16578	CLASP1_2	http://www.genome.jp/dbget-bin/www_bget?ko:K16578
c32524_g1_i3	K16578	CLASP1_2	http://www.genome.jp/dbget-bin/www_bget?ko:K16578
c32524_g1_i4	K16578	CLASP1_2	http://www.genome.jp/dbget-bin/www_bget?ko:K16578
c32524_g1_i5	K16578	CLASP1_2	http://www.genome.jp/dbget-bin/www_bget?ko:K16578
c32524_g1_i6	K16578	CLASP1_2	http://www.genome.jp/dbget-bin/www_bget?ko:K16578
c32729_g3_i1	K12394	AP1S1_2	http://www.genome.jp/dbget-bin/www_bget?ko:K12394	path:ko04142
c32729_g4_i1	K12304	CANT1	http://www.genome.jp/dbget-bin/www_bget?ko:K12304	path:ko00230;path:ko00240
c32380_g1_i1	K16518	AKAP1	http://www.genome.jp/dbget-bin/www_bget?ko:K16518
c32348_g1_i1	K13216	PPP1R8, NIPP1	http://www.genome.jp/dbget-bin/www_bget?ko:K13216
c32704_g1_i1	K14318	NUP88	http://www.genome.jp/dbget-bin/www_bget?ko:K14318	path:ko03013
c32755_g1_i1	K08292	EEF2K	http://www.genome.jp/dbget-bin/www_bget?ko:K08292	path:ko04152;path:ko04921
c32755_g1_i2	K08292	EEF2K	http://www.genome.jp/dbget-bin/www_bget?ko:K08292	path:ko04152;path:ko04921
c32755_g1_i3	K08292	EEF2K	http://www.genome.jp/dbget-bin/www_bget?ko:K08292	path:ko04152;path:ko04921
c32577_g1_i1	K16681	CRB	http://www.genome.jp/dbget-bin/www_bget?ko:K16681	path:ko04390;path:ko04391
c32577_g1_i2	K16681	CRB	http://www.genome.jp/dbget-bin/www_bget?ko:K16681	path:ko04390;path:ko04391
c32510_g1_i1	K12620	LSM1	http://www.genome.jp/dbget-bin/www_bget?ko:K12620	path:ko03018
c33076_g1_i1	K10569	NEIL3	http://www.genome.jp/dbget-bin/www_bget?ko:K10569	path:ko03410
c32739_g2_i1	K12182	HGS, HRS, VPS27	http://www.genome.jp/dbget-bin/www_bget?ko:K12182	path:ko04144;path:ko04145
c32739_g2_i2	K12182	HGS, HRS, VPS27	http://www.genome.jp/dbget-bin/www_bget?ko:K12182	path:ko04144;path:ko04145
c32934_g1_i1	K14440	SMARCAL1, HARP	http://www.genome.jp/dbget-bin/www_bget?ko:K14440
c32934_g1_i2	K14440	SMARCAL1, HARP	http://www.genome.jp/dbget-bin/www_bget?ko:K14440
c32120_g2_i1	K15009	SHANK	http://www.genome.jp/dbget-bin/www_bget?ko:K15009	path:ko04724
c32120_g2_i2	K15009	SHANK	http://www.genome.jp/dbget-bin/www_bget?ko:K15009	path:ko04724
c32605_g1_i1	K15376	GPHN	http://www.genome.jp/dbget-bin/www_bget?ko:K15376	path:ko04727
c32256_g1_i1	K03103	MINPP1	http://www.genome.jp/dbget-bin/www_bget?ko:K03103	path:ko00562
c32445_g2_i1	K14320	AAAS	http://www.genome.jp/dbget-bin/www_bget?ko:K14320	path:ko03013
c32445_g2_i2	K14320	AAAS	http://www.genome.jp/dbget-bin/www_bget?ko:K14320	path:ko03013
c32721_g1_i1	K10573	UBE2A, UBC2, RAD6A	http://www.genome.jp/dbget-bin/www_bget?ko:K10573	path:ko04120
c32261_g1_i1	K04409	PAK1	http://www.genome.jp/dbget-bin/www_bget?ko:K04409	path:ko04010;path:ko04011;path:ko04012;path:ko04014;path:ko04024;path:ko04062;path:ko04360;path:ko04510;path:ko04650;path:ko04660;path:ko04666;path:ko04810;path:ko05120;path:ko05205;path:ko05211
c32261_g1_i2	K04409	PAK1	http://www.genome.jp/dbget-bin/www_bget?ko:K04409	path:ko04010;path:ko04011;path:ko04012;path:ko04014;path:ko04024;path:ko04062;path:ko04360;path:ko04510;path:ko04650;path:ko04660;path:ko04666;path:ko04810;path:ko05120;path:ko05205;path:ko05211
c32203_g1_i1	K09530	DNAJC10	http://www.genome.jp/dbget-bin/www_bget?ko:K09530	path:ko04141
c32149_g1_i1	K07412	CYP2B	http://www.genome.jp/dbget-bin/www_bget?ko:K07412	path:ko00140;path:ko00590;path:ko00830;path:ko01100;path:ko05204
c32149_g2_i1	K14985	CYP18A1	http://www.genome.jp/dbget-bin/www_bget?ko:K14985	path:ko00981;path:ko01110
c32906_g2_i1	K11672	ACTR5, ARP5, INO80M	http://www.genome.jp/dbget-bin/www_bget?ko:K11672
c32906_g2_i5	K11672	ACTR5, ARP5, INO80M	http://www.genome.jp/dbget-bin/www_bget?ko:K11672
c32906_g2_i6	K11672	ACTR5, ARP5, INO80M	http://www.genome.jp/dbget-bin/www_bget?ko:K11672
c32906_g2_i7	K11672	ACTR5, ARP5, INO80M	http://www.genome.jp/dbget-bin/www_bget?ko:K11672
c32298_g2_i2	K13997	PDHX	http://www.genome.jp/dbget-bin/www_bget?ko:K13997	path:ko00010;path:ko00020;path:ko00620;path:ko01100
c32796_g1_i1	K16745	B9D2	http://www.genome.jp/dbget-bin/www_bget?ko:K16745
c32796_g1_i2	K16745	B9D2	http://www.genome.jp/dbget-bin/www_bget?ko:K16745
c32796_g1_i3	K16745	B9D2	http://www.genome.jp/dbget-bin/www_bget?ko:K16745
c32984_g1_i1	K09228	KRAB	http://www.genome.jp/dbget-bin/www_bget?ko:K09228
c32430_g1_i1	K10951	SLC12A2, NKCC1	http://www.genome.jp/dbget-bin/www_bget?ko:K10951	path:ko04970;path:ko04972;path:ko05110
c32375_g1_i2	K11680	NHP10	http://www.genome.jp/dbget-bin/www_bget?ko:K11680
c32375_g1_i4	K11680	NHP10	http://www.genome.jp/dbget-bin/www_bget?ko:K11680
c32160_g1_i1	K07293	PTPN11	http://www.genome.jp/dbget-bin/www_bget?ko:K07293	path:ko04013;path:ko04014;path:ko04630;path:ko04650;path:ko04670;path:ko04722;path:ko04920;path:ko05120;path:ko05168;path:ko05205;path:ko05211;path:ko05220
c32160_g1_i2	K07293	PTPN11	http://www.genome.jp/dbget-bin/www_bget?ko:K07293	path:ko04013;path:ko04014;path:ko04630;path:ko04650;path:ko04670;path:ko04722;path:ko04920;path:ko05120;path:ko05168;path:ko05205;path:ko05211;path:ko05220
c32160_g4_i1	K05759	PFN	http://www.genome.jp/dbget-bin/www_bget?ko:K05759	path:ko04015;path:ko04810;path:ko05131;path:ko05132
c32415_g1_i1	K11415	SIRT5, SIR2L5	http://www.genome.jp/dbget-bin/www_bget?ko:K11415
c33070_g1_i1	K06631	PLK1	http://www.genome.jp/dbget-bin/www_bget?ko:K06631	path:ko04068;path:ko04110;path:ko04114;path:ko04914
c32921_g1_i1	K11492	NCAPG2, LUZP5	http://www.genome.jp/dbget-bin/www_bget?ko:K11492
c32921_g1_i2	K11492	NCAPG2, LUZP5	http://www.genome.jp/dbget-bin/www_bget?ko:K11492
c32921_g1_i3	K11492	NCAPG2, LUZP5	http://www.genome.jp/dbget-bin/www_bget?ko:K11492
c32661_g1_i1	K05702	AF6, MLLT4	http://www.genome.jp/dbget-bin/www_bget?ko:K05702	path:ko04014;path:ko04015;path:ko04024;path:ko04520;path:ko04530;path:ko04670
c32326_g1_i1	K01197	hya	http://www.genome.jp/dbget-bin/www_bget?ko:K01197	path:ko00531;path:ko01100
c32326_g1_i2	K01197	hya	http://www.genome.jp/dbget-bin/www_bget?ko:K01197	path:ko00531;path:ko01100
c32326_g1_i3	K01197	hya	http://www.genome.jp/dbget-bin/www_bget?ko:K01197	path:ko00531;path:ko01100
c32200_g3_i1	K05849	SLC8A, NCX	http://www.genome.jp/dbget-bin/www_bget?ko:K05849	path:ko04020;path:ko04022;path:ko04974
c32200_g3_i4	K05849	SLC8A, NCX	http://www.genome.jp/dbget-bin/www_bget?ko:K05849	path:ko04020;path:ko04022;path:ko04974
c32200_g3_i5	K05849	SLC8A, NCX	http://www.genome.jp/dbget-bin/www_bget?ko:K05849	path:ko04020;path:ko04022;path:ko04974
c32200_g3_i6	K05849	SLC8A, NCX	http://www.genome.jp/dbget-bin/www_bget?ko:K05849	path:ko04020;path:ko04022;path:ko04974
c32282_g1_i1	K09228	KRAB	http://www.genome.jp/dbget-bin/www_bget?ko:K09228
c32935_g1_i1	K06240	LAMA3_5	http://www.genome.jp/dbget-bin/www_bget?ko:K06240	path:ko04151;path:ko04510;path:ko04512;path:ko05145;path:ko05146;path:ko05200;path:ko05222
c32935_g1_i2	K06240	LAMA3_5	http://www.genome.jp/dbget-bin/www_bget?ko:K06240	path:ko04151;path:ko04510;path:ko04512;path:ko05145;path:ko05146;path:ko05200;path:ko05222
c32594_g1_i1	K11262	ACAC	http://www.genome.jp/dbget-bin/www_bget?ko:K11262	path:ko00061;path:ko00254;path:ko00620;path:ko00640;path:ko01100;path:ko01212;path:ko04152;path:ko04910
c32594_g1_i2	K11262	ACAC	http://www.genome.jp/dbget-bin/www_bget?ko:K11262	path:ko00061;path:ko00254;path:ko00620;path:ko00640;path:ko01100;path:ko01212;path:ko04152;path:ko04910
c32594_g1_i3	K11262	ACAC	http://www.genome.jp/dbget-bin/www_bget?ko:K11262	path:ko00061;path:ko00254;path:ko00620;path:ko00640;path:ko01100;path:ko01212;path:ko04152;path:ko04910
c32303_g1_i1	K09228	KRAB	http://www.genome.jp/dbget-bin/www_bget?ko:K09228
c32397_g2_i2	K09050	CREBN	http://www.genome.jp/dbget-bin/www_bget?ko:K09050
c32397_g2_i3	K09050	CREBN	http://www.genome.jp/dbget-bin/www_bget?ko:K09050
c32397_g2_i4	K09050	CREBN	http://www.genome.jp/dbget-bin/www_bget?ko:K09050
c32397_g2_i5	K09050	CREBN	http://www.genome.jp/dbget-bin/www_bget?ko:K09050
c32397_g2_i6	K09050	CREBN	http://www.genome.jp/dbget-bin/www_bget?ko:K09050
c32397_g2_i7	K09050	CREBN	http://www.genome.jp/dbget-bin/www_bget?ko:K09050
c33053_g1_i2	K11276	NPM1	http://www.genome.jp/dbget-bin/www_bget?ko:K11276
c33087_g1_i1	K06839	SLIT2	http://www.genome.jp/dbget-bin/www_bget?ko:K06839	path:ko04360
c33087_g1_i2	K06839	SLIT2	http://www.genome.jp/dbget-bin/www_bget?ko:K06839	path:ko04360
c33087_g1_i3	K06839	SLIT2	http://www.genome.jp/dbget-bin/www_bget?ko:K06839	path:ko04360
c32993_g2_i2	K03320	amt, AMT, MEP	http://www.genome.jp/dbget-bin/www_bget?ko:K03320
c33040_g1_i1	K12301	SLC17A5	http://www.genome.jp/dbget-bin/www_bget?ko:K12301	path:ko04142
c33040_g1_i2	K12301	SLC17A5	http://www.genome.jp/dbget-bin/www_bget?ko:K12301	path:ko04142
c32243_g1_i1	K03844	ALG11	http://www.genome.jp/dbget-bin/www_bget?ko:K03844	path:ko00510;path:ko00513;path:ko01100
c32243_g1_i2	K03844	ALG11	http://www.genome.jp/dbget-bin/www_bget?ko:K03844	path:ko00510;path:ko00513;path:ko01100
c32072_g1_i1	K08110	GPC4	http://www.genome.jp/dbget-bin/www_bget?ko:K08110	path:ko04310
c32804_g1_i1	K00820	E2.6.1.16, glmS	http://www.genome.jp/dbget-bin/www_bget?ko:K00820	path:ko00250;path:ko00520;path:ko01100;path:ko01110
c32804_g1_i2	K00820	E2.6.1.16, glmS	http://www.genome.jp/dbget-bin/www_bget?ko:K00820	path:ko00250;path:ko00520;path:ko01100;path:ko01110
c32804_g1_i3	K00820	E2.6.1.16, glmS	http://www.genome.jp/dbget-bin/www_bget?ko:K00820	path:ko00250;path:ko00520;path:ko01100;path:ko01110
c32804_g1_i4	K00820	E2.6.1.16, glmS	http://www.genome.jp/dbget-bin/www_bget?ko:K00820	path:ko00250;path:ko00520;path:ko01100;path:ko01110
c32487_g1_i1	K06059	ADAM17, TACE	http://www.genome.jp/dbget-bin/www_bget?ko:K06059	path:ko04330;path:ko05010;path:ko05120
c32487_g1_i2	K06059	ADAM17, TACE	http://www.genome.jp/dbget-bin/www_bget?ko:K06059	path:ko04330;path:ko05010;path:ko05120
c32487_g1_i3	K06059	ADAM17, TACE	http://www.genome.jp/dbget-bin/www_bget?ko:K06059	path:ko04330;path:ko05010;path:ko05120
c32502_g1_i1	K10719	JHEH	http://www.genome.jp/dbget-bin/www_bget?ko:K10719	path:ko00981;path:ko01110
c32502_g1_i2	K10719	JHEH	http://www.genome.jp/dbget-bin/www_bget?ko:K10719	path:ko00981;path:ko01110
c32631_g1_i1	K10089	M6PR	http://www.genome.jp/dbget-bin/www_bget?ko:K10089	path:ko04142;path:ko04145
c32351_g1_i1	K12580	CNOT3, NOT3	http://www.genome.jp/dbget-bin/www_bget?ko:K12580	path:ko03018
c32439_g2_i1	K10758	QSOX	http://www.genome.jp/dbget-bin/www_bget?ko:K10758
c32586_g1_i1	K05719	ITGB1	http://www.genome.jp/dbget-bin/www_bget?ko:K05719	path:ko04015;path:ko04145;path:ko04151;path:ko04360;path:ko04510;path:ko04512;path:ko04514;path:ko04611;path:ko04670;path:ko04810;path:ko05100;path:ko05130;path:ko05131;path:ko05133;path:ko05140;path:ko05145;path:ko05200;path:ko05205;path:ko05222;path:ko05410;path:ko05412;path:ko05414
c32586_g1_i2	K05719	ITGB1	http://www.genome.jp/dbget-bin/www_bget?ko:K05719	path:ko04015;path:ko04145;path:ko04151;path:ko04360;path:ko04510;path:ko04512;path:ko04514;path:ko04611;path:ko04670;path:ko04810;path:ko05100;path:ko05130;path:ko05131;path:ko05133;path:ko05140;path:ko05145;path:ko05200;path:ko05205;path:ko05222;path:ko05410;path:ko05412;path:ko05414
c32861_g1_i1	K01596	E4.1.1.32, pckA, PEPCK	http://www.genome.jp/dbget-bin/www_bget?ko:K01596	path:ko00010;path:ko00020;path:ko00620;path:ko01100;path:ko01110;path:ko01120;path:ko03320;path:ko04068;path:ko04151;path:ko04152;path:ko04910;path:ko04920;path:ko04964
c19811_g1_i1	K16336	SDC2	http://www.genome.jp/dbget-bin/www_bget?ko:K16336	path:ko04514;path:ko05144;path:ko05205
c19811_g1_i2	K16336	SDC2	http://www.genome.jp/dbget-bin/www_bget?ko:K16336	path:ko04514;path:ko05144;path:ko05205
c20651_g1_i1	K11275	H1_5	http://www.genome.jp/dbget-bin/www_bget?ko:K11275
c20782_g1_i1	K09228	KRAB	http://www.genome.jp/dbget-bin/www_bget?ko:K09228
c20329_g1_i1	K13987	NUDT5	http://www.genome.jp/dbget-bin/www_bget?ko:K13987	path:ko00230
c20329_g1_i2	K13987	NUDT5	http://www.genome.jp/dbget-bin/www_bget?ko:K13987	path:ko00230
c20026_g1_i1	K00621	E2.3.1.4, GNA1	http://www.genome.jp/dbget-bin/www_bget?ko:K00621	path:ko00520;path:ko01110
c20042_g1_i1	K01074	PPT	http://www.genome.jp/dbget-bin/www_bget?ko:K01074	path:ko00062;path:ko01100;path:ko01212;path:ko04142
c20308_g1_i1	K01540	ATP1B	http://www.genome.jp/dbget-bin/www_bget?ko:K01540	path:ko04022;path:ko04024;path:ko04260;path:ko04261;path:ko04911;path:ko04918;path:ko04919;path:ko04960;path:ko04961;path:ko04964;path:ko04970;path:ko04971;path:ko04972;path:ko04973;path:ko04974;path:ko04976;path:ko04978
c19943_g1_i1	K01805	xylA	http://www.genome.jp/dbget-bin/www_bget?ko:K01805	path:ko00040;path:ko00051;path:ko01100
c20444_g3_i1	K16546	FGFR10P	http://www.genome.jp/dbget-bin/www_bget?ko:K16546
c20225_g1_i1	K02133	ATPeF1B, ATP5B	http://www.genome.jp/dbget-bin/www_bget?ko:K02133	path:ko00190;path:ko01100;path:ko05010;path:ko05012;path:ko05016
c20940_g1_i1	K11984	SART1, HAF, SNU66	http://www.genome.jp/dbget-bin/www_bget?ko:K11984	path:ko03040
c20187_g1_i1	K10730	RECQL4	http://www.genome.jp/dbget-bin/www_bget?ko:K10730
c20815_g1_i1	K09228	KRAB	http://www.genome.jp/dbget-bin/www_bget?ko:K09228
c20409_g2_i1	K15441	TAD2, ADAT2	http://www.genome.jp/dbget-bin/www_bget?ko:K15441
c20106_g1_i1	K11981	RNF41, NRDP1	http://www.genome.jp/dbget-bin/www_bget?ko:K11981	path:ko04144
c20178_g1_i1	K00106	XDH	http://www.genome.jp/dbget-bin/www_bget?ko:K00106	path:ko00230;path:ko00232;path:ko00983;path:ko01100;path:ko01110;path:ko01120;path:ko04146
c19920_g1_i1	K10955	MUC2	http://www.genome.jp/dbget-bin/www_bget?ko:K10955	path:ko05110;path:ko05146
c19955_g1_i1	K08765	CPT1	http://www.genome.jp/dbget-bin/www_bget?ko:K08765	path:ko00071;path:ko01212;path:ko03320;path:ko04152;path:ko04920
c20065_g1_i1	K01883	CARS, cysS	http://www.genome.jp/dbget-bin/www_bget?ko:K01883	path:ko00970
c20749_g1_i1	K15259	PARP7S	http://www.genome.jp/dbget-bin/www_bget?ko:K15259
c20055_g1_i1	K07364	TEC	http://www.genome.jp/dbget-bin/www_bget?ko:K07364	path:ko04380;path:ko04660
c20592_g1_i1	K15176	CTR9	http://www.genome.jp/dbget-bin/www_bget?ko:K15176
c20194_g1_i1	K13115	CCDC130	http://www.genome.jp/dbget-bin/www_bget?ko:K13115
c20468_g1_i1	K16487	SAS-6, SASS6	http://www.genome.jp/dbget-bin/www_bget?ko:K16487
c19974_g1_i1	K13702	ABHD10	http://www.genome.jp/dbget-bin/www_bget?ko:K13702
c19974_g1_i2	K13702	ABHD10	http://www.genome.jp/dbget-bin/www_bget?ko:K13702
c19974_g1_i3	K13702	ABHD10	http://www.genome.jp/dbget-bin/www_bget?ko:K13702
c20340_g1_i1	K01206	FUCA	http://www.genome.jp/dbget-bin/www_bget?ko:K01206	path:ko00511
c20659_g1_i1	K14937	CYP15A1	http://www.genome.jp/dbget-bin/www_bget?ko:K14937	path:ko00981;path:ko01110
c20193_g1_i1	K12168	HECW2	http://www.genome.jp/dbget-bin/www_bget?ko:K12168
c20061_g1_i1	K02145	ATPeVA, ATP6A1	http://www.genome.jp/dbget-bin/www_bget?ko:K02145	path:ko00190;path:ko01100;path:ko04145;path:ko04721;path:ko04966;path:ko05110;path:ko05120;path:ko05323
c20222_g1_i1	K13104	ZNF830, CCDC16	http://www.genome.jp/dbget-bin/www_bget?ko:K13104
c19924_g1_i1	K10595	HERC2	http://www.genome.jp/dbget-bin/www_bget?ko:K10595	path:ko04120
c20197_g1_i1	K07365	NCK	http://www.genome.jp/dbget-bin/www_bget?ko:K07365	path:ko04012;path:ko04660;path:ko05130
c20471_g1_i1	K03028	PSMD2, RPN1	http://www.genome.jp/dbget-bin/www_bget?ko:K03028	path:ko03050;path:ko05169
c20494_g1_i1	K04374	ATF4, CREB2	http://www.genome.jp/dbget-bin/www_bget?ko:K04374	path:ko04010;path:ko04022;path:ko04141;path:ko04151;path:ko04261;path:ko04668;path:ko04720;path:ko04722;path:ko04725;path:ko04728;path:ko04911;path:ko04912;path:ko04915;path:ko04918;path:ko04932;path:ko05030;path:ko05031;path:ko05034;path:ko05161;path:ko05166;path:ko05203;path:ko05215
c20871_g1_i1	K01389	MME	http://www.genome.jp/dbget-bin/www_bget?ko:K01389	path:ko04614;path:ko04640;path:ko04974;path:ko05010
c20491_g1_i1	K11649	SMARCC	http://www.genome.jp/dbget-bin/www_bget?ko:K11649
c20491_g1_i2	K11649	SMARCC	http://www.genome.jp/dbget-bin/www_bget?ko:K11649
c20164_g1_i1	K16742	ARL2BP, BART	http://www.genome.jp/dbget-bin/www_bget?ko:K16742
c20164_g1_i2	K16742	ARL2BP, BART	http://www.genome.jp/dbget-bin/www_bget?ko:K16742
c20288_g1_i1	K01477	alc, ALLC	http://www.genome.jp/dbget-bin/www_bget?ko:K01477	path:ko00230;path:ko01100;path:ko01120
c20046_g1_i1	K03671	trxA	http://www.genome.jp/dbget-bin/www_bget?ko:K03671
c20951_g1_i2	K01512	acyP	http://www.genome.jp/dbget-bin/www_bget?ko:K01512	path:ko00620;path:ko00627;path:ko01120
c20951_g1_i3	K01512	acyP	http://www.genome.jp/dbget-bin/www_bget?ko:K01512	path:ko00620;path:ko00627;path:ko01120
c20244_g1_i1	K03846	ALG9	http://www.genome.jp/dbget-bin/www_bget?ko:K03846	path:ko00510;path:ko00513;path:ko01100
c20746_g1_i1	K13219	SFPQ, PSF	http://www.genome.jp/dbget-bin/www_bget?ko:K13219
c20191_g1_i1	K01893	NARS, asnS	http://www.genome.jp/dbget-bin/www_bget?ko:K01893	path:ko00970
c20766_g1_i1	K10162	BAMBI	http://www.genome.jp/dbget-bin/www_bget?ko:K10162	path:ko04310;path:ko04350
c19944_g1_i1	K05110	EPHB1, ELK, NET	http://www.genome.jp/dbget-bin/www_bget?ko:K05110	path:ko04360
c19944_g1_i2	K05110	EPHB1, ELK, NET	http://www.genome.jp/dbget-bin/www_bget?ko:K05110	path:ko04360
c20577_g1_i1	K11204	GCLC	http://www.genome.jp/dbget-bin/www_bget?ko:K11204	path:ko00480;path:ko01100
c20275_g1_i1	K08203	SLC22A6, OAT1	http://www.genome.jp/dbget-bin/www_bget?ko:K08203
c20699_g1_i1	K03263	EIF5A	http://www.genome.jp/dbget-bin/www_bget?ko:K03263
c20496_g1_i1	K04503	CCND1	http://www.genome.jp/dbget-bin/www_bget?ko:K04503	path:ko04068;path:ko04110;path:ko04115;path:ko04151;path:ko04152;path:ko04310;path:ko04390;path:ko04510;path:ko04630;path:ko04917;path:ko04919;path:ko04921;path:ko05161;path:ko05162;path:ko05166;path:ko05200;path:ko05203;path:ko05205;path:ko05206;path:ko05210;path:ko05212;path:ko05213;path:ko05214;path:ko05215;path:ko05216;path:ko05218;path:ko05219;path:ko05220;path:ko05221;path:ko05222;path:ko05…
c20383_g1_i1	K14286	AGXT2L	http://www.genome.jp/dbget-bin/www_bget?ko:K14286	path:ko00564;path:ko01100
c20188_g1_i1	K15731	CTDSP	http://www.genome.jp/dbget-bin/www_bget?ko:K15731
c20188_g1_i2	K15731	CTDSP	http://www.genome.jp/dbget-bin/www_bget?ko:K15731
c20111_g1_i1	K14856	SDA1, SDAD1	http://www.genome.jp/dbget-bin/www_bget?ko:K14856
c20638_g1_i1	K07203	FRAP	http://www.genome.jp/dbget-bin/www_bget?ko:K07203	path:ko04012;path:ko04066;path:ko04150;path:ko04151;path:ko04152;path:ko04910;path:ko04919;path:ko04920;path:ko04930;path:ko05200;path:ko05205;path:ko05206;path:ko05214;path:ko05215;path:ko05221
c19828_g1_i1	K10364	CAPZA	http://www.genome.jp/dbget-bin/www_bget?ko:K10364
c20173_g1_i1	K11976	RNF216	http://www.genome.jp/dbget-bin/www_bget?ko:K11976
c20024_g1_i1	K06093	PARD6	http://www.genome.jp/dbget-bin/www_bget?ko:K06093	path:ko04015;path:ko04144;path:ko04390;path:ko04391;path:ko04530
c20207_g1_i1	K13347	PXMP2, PMP22	http://www.genome.jp/dbget-bin/www_bget?ko:K13347	path:ko04146
c20207_g1_i2	K13347	PXMP2, PMP22	http://www.genome.jp/dbget-bin/www_bget?ko:K13347	path:ko04146
c20125_g1_i1	K04345	PKA	http://www.genome.jp/dbget-bin/www_bget?ko:K04345	path:ko04010;path:ko04014;path:ko04020;path:ko04024;path:ko04062;path:ko04113;path:ko04114;path:ko04210;path:ko04261;path:ko04270;path:ko04310;path:ko04340;path:ko04540;path:ko04611;path:ko04713;path:ko04720;path:ko04723;path:ko04724;path:ko04725;path:ko04726;path:ko04727;path:ko04728;path:ko04740;path:ko04742;path:ko04750;path:ko04910;path:ko04911;path:ko04912;path:ko04913;path:ko04914;path:ko04…
c20125_g1_i2	K04345	PKA	http://www.genome.jp/dbget-bin/www_bget?ko:K04345	path:ko04010;path:ko04014;path:ko04020;path:ko04024;path:ko04062;path:ko04113;path:ko04114;path:ko04210;path:ko04261;path:ko04270;path:ko04310;path:ko04340;path:ko04540;path:ko04611;path:ko04713;path:ko04720;path:ko04723;path:ko04724;path:ko04725;path:ko04726;path:ko04727;path:ko04728;path:ko04740;path:ko04742;path:ko04750;path:ko04910;path:ko04911;path:ko04912;path:ko04913;path:ko04914;path:ko04…
c20125_g1_i3	K04345	PKA	http://www.genome.jp/dbget-bin/www_bget?ko:K04345	path:ko04010;path:ko04014;path:ko04020;path:ko04024;path:ko04062;path:ko04113;path:ko04114;path:ko04210;path:ko04261;path:ko04270;path:ko04310;path:ko04340;path:ko04540;path:ko04611;path:ko04713;path:ko04720;path:ko04723;path:ko04724;path:ko04725;path:ko04726;path:ko04727;path:ko04728;path:ko04740;path:ko04742;path:ko04750;path:ko04910;path:ko04911;path:ko04912;path:ko04913;path:ko04914;path:ko04…
c20630_g1_i1	K12826	SF3A2, SAP62	http://www.genome.jp/dbget-bin/www_bget?ko:K12826	path:ko03040
c20567_g1_i1	K15498	PPP6C	http://www.genome.jp/dbget-bin/www_bget?ko:K15498
c20297_g1_i1	K07204	RAPTOR	http://www.genome.jp/dbget-bin/www_bget?ko:K07204	path:ko04150;path:ko04151;path:ko04152;path:ko04910;path:ko05206
c20057_g1_i1	K03939	NDUFS6	http://www.genome.jp/dbget-bin/www_bget?ko:K03939	path:ko00190;path:ko01100;path:ko04932;path:ko05010;path:ko05012;path:ko05016
c20126_g1_i1	K12887	HNRNPM	http://www.genome.jp/dbget-bin/www_bget?ko:K12887	path:ko03040
c20126_g1_i2	K12887	HNRNPM	http://www.genome.jp/dbget-bin/www_bget?ko:K12887	path:ko03040
c20363_g1_i1	K09228	KRAB	http://www.genome.jp/dbget-bin/www_bget?ko:K09228
c20755_g1_i1	K03064	PSMC6, RPT4	http://www.genome.jp/dbget-bin/www_bget?ko:K03064	path:ko03050;path:ko05169
c20570_g1_i1	K12373	HEXA_B	http://www.genome.jp/dbget-bin/www_bget?ko:K12373	path:ko00511;path:ko00520;path:ko00531;path:ko00603;path:ko00604;path:ko01100;path:ko01110;path:ko04142
c20150_g1_i1	K17259	CIB1	http://www.genome.jp/dbget-bin/www_bget?ko:K17259
c20840_g1_i1	K17046	DEK	http://www.genome.jp/dbget-bin/www_bget?ko:K17046
c19938_g1_i1	K12617	PATL1, PAT1	http://www.genome.jp/dbget-bin/www_bget?ko:K12617	path:ko03018
c20142_g1_i1	K17583	NOM1	http://www.genome.jp/dbget-bin/www_bget?ko:K17583
c20665_g1_i1	K11795	IQWD1, NRIP, ARCAP	http://www.genome.jp/dbget-bin/www_bget?ko:K11795
c20685_g1_i1	K01008	selD, SEPHS	http://www.genome.jp/dbget-bin/www_bget?ko:K01008	path:ko00450;path:ko01100
c20498_g1_i1	K08592	SENP1	http://www.genome.jp/dbget-bin/www_bget?ko:K08592
c20640_g1_i1	K10317	FBXO42	http://www.genome.jp/dbget-bin/www_bget?ko:K10317
c19913_g1_i1	K02359	EGH	http://www.genome.jp/dbget-bin/www_bget?ko:K02359	path:ko04320
c20799_g1_i1	K17108	GBA2	http://www.genome.jp/dbget-bin/www_bget?ko:K17108	path:ko00511;path:ko00600;path:ko01100
c20789_g1_i1	K09555	BAG1	http://www.genome.jp/dbget-bin/www_bget?ko:K09555	path:ko04141
c20789_g1_i3	K09555	BAG1	http://www.genome.jp/dbget-bin/www_bget?ko:K09555	path:ko04141
c19996_g1_i1	K07521	UNC5	http://www.genome.jp/dbget-bin/www_bget?ko:K07521	path:ko04360
c19893_g1_i1	K01578	E4.1.1.9, MLYCD	http://www.genome.jp/dbget-bin/www_bget?ko:K01578	path:ko00410;path:ko00640;path:ko01100;path:ko04146;path:ko04152
c20162_g1_i1	K04676	SMAD1	http://www.genome.jp/dbget-bin/www_bget?ko:K04676	path:ko04350;path:ko04390;path:ko04391;path:ko05202
c20404_g1_i1	K08703	NR3BN, ERR	http://www.genome.jp/dbget-bin/www_bget?ko:K08703
c20792_g1_i1	K11096	SNRPD2, SMD2	http://www.genome.jp/dbget-bin/www_bget?ko:K11096	path:ko03040
c20107_g1_i1	K00629	GPAT1_2	http://www.genome.jp/dbget-bin/www_bget?ko:K00629	path:ko00561;path:ko00564;path:ko01100
c20107_g1_i2	K00629	GPAT1_2	http://www.genome.jp/dbget-bin/www_bget?ko:K00629	path:ko00561;path:ko00564;path:ko01100
c20426_g1_i1	K10888	FANCA	http://www.genome.jp/dbget-bin/www_bget?ko:K10888	path:ko03460
c20643_g1_i1	K17264	ERP44, TXNDC4	http://www.genome.jp/dbget-bin/www_bget?ko:K17264
c19933_g1_i1	K15043	KPNA2	http://www.genome.jp/dbget-bin/www_bget?ko:K15043	path:ko05164
c20611_g1_i1	K04565	SOD1	http://www.genome.jp/dbget-bin/www_bget?ko:K04565	path:ko04146;path:ko05014;path:ko05016;path:ko05020
c20459_g1_i1	K01312	PRSS	http://www.genome.jp/dbget-bin/www_bget?ko:K01312	path:ko04080;path:ko04972;path:ko04974;path:ko05164
c20865_g1_i1	K09560	ST13	http://www.genome.jp/dbget-bin/www_bget?ko:K09560
c20408_g1_i1	K03965	NDUFB9	http://www.genome.jp/dbget-bin/www_bget?ko:K03965	path:ko00190;path:ko01100;path:ko04932;path:ko05010;path:ko05012;path:ko05016
c20649_g1_i1	K02980	RP-S29e, RPS29	http://www.genome.jp/dbget-bin/www_bget?ko:K02980	path:ko03010
c20069_g1_i1	K10343	SPSB1_4, SSB1, SSB4	http://www.genome.jp/dbget-bin/www_bget?ko:K10343
c20069_g1_i2	K10343	SPSB1_4, SSB1, SSB4	http://www.genome.jp/dbget-bin/www_bget?ko:K10343
c20006_g1_i1	K00106	XDH	http://www.genome.jp/dbget-bin/www_bget?ko:K00106	path:ko00230;path:ko00232;path:ko00983;path:ko01100;path:ko01110;path:ko01120;path:ko04146
c20670_g1_i1	K17259	CIB1	http://www.genome.jp/dbget-bin/www_bget?ko:K17259
c20605_g1_i1	K12815	DHX38, PRP16	http://www.genome.jp/dbget-bin/www_bget?ko:K12815	path:ko03040
c20031_g1_i1	K17586	PHRF1	http://www.genome.jp/dbget-bin/www_bget?ko:K17586
c20031_g1_i2	K17586	PHRF1	http://www.genome.jp/dbget-bin/www_bget?ko:K17586
c20031_g1_i3	K17499	PPM1G, PP2CG	http://www.genome.jp/dbget-bin/www_bget?ko:K17499
c20110_g1_i1	K08967	mtnD, mtnZ, ADI1	http://www.genome.jp/dbget-bin/www_bget?ko:K08967	path:ko00270;path:ko01100
c19849_g1_i1	K10297	FBXO11	http://www.genome.jp/dbget-bin/www_bget?ko:K10297
c20652_g1_i1	K06693	PSMD9	http://www.genome.jp/dbget-bin/www_bget?ko:K06693
c20618_g1_i1	K10733	GINS2, PSF2	http://www.genome.jp/dbget-bin/www_bget?ko:K10733
c20485_g1_i1	K11722	BRD4	http://www.genome.jp/dbget-bin/www_bget?ko:K11722
c20873_g1_i1	K08059	IFI30, GILT	http://www.genome.jp/dbget-bin/www_bget?ko:K08059	path:ko04612
c20947_g1_i1	K10583	UBE2S, E2EPF	http://www.genome.jp/dbget-bin/www_bget?ko:K10583	path:ko04120
c20077_g1_i1	K06636	SMC1	http://www.genome.jp/dbget-bin/www_bget?ko:K06636	path:ko04110;path:ko04111;path:ko04113;path:ko04114
c20077_g1_i2	K06636	SMC1	http://www.genome.jp/dbget-bin/www_bget?ko:K06636	path:ko04110;path:ko04111;path:ko04113;path:ko04114
c20077_g1_i3	K06636	SMC1	http://www.genome.jp/dbget-bin/www_bget?ko:K06636	path:ko04110;path:ko04111;path:ko04113;path:ko04114
c19880_g1_i1	K12169	KPC1, RNF123	http://www.genome.jp/dbget-bin/www_bget?ko:K12169
c20912_g1_i1	K10359	MYO7	http://www.genome.jp/dbget-bin/www_bget?ko:K10359
c20905_g1_i1	K01915	glnA	http://www.genome.jp/dbget-bin/www_bget?ko:K01915	path:ko00250;path:ko00330;path:ko00630;path:ko00910;path:ko01100;path:ko01120;path:ko01230;path:ko02020;path:ko04724;path:ko04727
c20628_g1_i1	K14827	IPI1, TEX10	http://www.genome.jp/dbget-bin/www_bget?ko:K14827
c20571_g1_i1	K01940	E6.3.4.5, argG	http://www.genome.jp/dbget-bin/www_bget?ko:K01940	path:ko00250;path:ko00330;path:ko01100;path:ko01110;path:ko01230
c19777_g1_i1	K18080	TNS	http://www.genome.jp/dbget-bin/www_bget?ko:K18080
c20734_g1_i1	K11667	INO80C, IES6	http://www.genome.jp/dbget-bin/www_bget?ko:K11667
c20734_g1_i2	K11667	INO80C, IES6	http://www.genome.jp/dbget-bin/www_bget?ko:K11667
c20623_g1_i1	K06839	SLIT2	http://www.genome.jp/dbget-bin/www_bget?ko:K06839	path:ko04360
c20465_g1_i1	K02941	RP-LP0, RPLP0	http://www.genome.jp/dbget-bin/www_bget?ko:K02941	path:ko03010
c20465_g2_i1	K02943	RP-LP2, RPLP2	http://www.genome.jp/dbget-bin/www_bget?ko:K02943	path:ko03010
c20234_g1_i1	K10639	CCNB1IP1, HEI10	http://www.genome.jp/dbget-bin/www_bget?ko:K10639
c20934_g1_i1	K17407	MRPS28	http://www.genome.jp/dbget-bin/www_bget?ko:K17407
c20934_g1_i2	K17407	MRPS28	http://www.genome.jp/dbget-bin/www_bget?ko:K17407
c20786_g1_i1	K14771	NOC4, UTP19	http://www.genome.jp/dbget-bin/www_bget?ko:K14771
c19921_g1_i1	K09228	KRAB	http://www.genome.jp/dbget-bin/www_bget?ko:K09228
c20336_g1_i1	K09187	MLL2, ALR	http://www.genome.jp/dbget-bin/www_bget?ko:K09187	path:ko00310
c20051_g1_i1	K01101	E3.1.3.41	http://www.genome.jp/dbget-bin/www_bget?ko:K01101	path:ko00627;path:ko01120
c20051_g1_i2	K01101	E3.1.3.41	http://www.genome.jp/dbget-bin/www_bget?ko:K01101	path:ko00627;path:ko01120
c20123_g1_i1	K06890	K06890	http://www.genome.jp/dbget-bin/www_bget?ko:K06890
c20779_g1_i1	K00139	ALDH5A1	http://www.genome.jp/dbget-bin/www_bget?ko:K00139	path:ko00250;path:ko00650;path:ko01100;path:ko01120
c20036_g1_i1	K06233	LRP2	http://www.genome.jp/dbget-bin/www_bget?ko:K06233	path:ko04340;path:ko04918
c20341_g1_i1	K09228	KRAB	http://www.genome.jp/dbget-bin/www_bget?ko:K09228
c19935_g1_i1	K10335	ASB13	http://www.genome.jp/dbget-bin/www_bget?ko:K10335
c19935_g1_i2	K10335	ASB13	http://www.genome.jp/dbget-bin/www_bget?ko:K10335
c20170_g1_i1	K12473	LDLR	http://www.genome.jp/dbget-bin/www_bget?ko:K12473	path:ko04144;path:ko04913;path:ko04976;path:ko05145;path:ko05160
c20384_g1_i1	K05019	CLNS1A	http://www.genome.jp/dbget-bin/www_bget?ko:K05019	path:ko03013
c20616_g1_i1	K09533	DNAJC13	http://www.genome.jp/dbget-bin/www_bget?ko:K09533
c20616_g1_i2	K09533	DNAJC13	http://www.genome.jp/dbget-bin/www_bget?ko:K09533
c20580_g1_i1	K01083	E3.1.3.8	http://www.genome.jp/dbget-bin/www_bget?ko:K01083	path:ko00562
c20580_g1_i2	K01083	E3.1.3.8	http://www.genome.jp/dbget-bin/www_bget?ko:K01083	path:ko00562
c20580_g1_i3	K01083	E3.1.3.8	http://www.genome.jp/dbget-bin/www_bget?ko:K01083	path:ko00562
c20163_g1_i1	K09174	RFX4	http://www.genome.jp/dbget-bin/www_bget?ko:K09174
c20348_g1_i1	K06847	RGM	http://www.genome.jp/dbget-bin/www_bget?ko:K06847
c20348_g1_i2	K06847	RGM	http://www.genome.jp/dbget-bin/www_bget?ko:K06847
c20002_g1_i1	K17563	CHCHD3, MINOS3	http://www.genome.jp/dbget-bin/www_bget?ko:K17563
c20190_g1_i1	K17606	IGBP1, TAP42	http://www.genome.jp/dbget-bin/www_bget?ko:K17606
c20022_g1_i1	K02327	POLD1	http://www.genome.jp/dbget-bin/www_bget?ko:K02327	path:ko00230;path:ko00240;path:ko01100;path:ko03030;path:ko03410;path:ko03420;path:ko03430;path:ko03440;path:ko05166
c20265_g1_i1	K03177	truB, PUS4, TRUB1	http://www.genome.jp/dbget-bin/www_bget?ko:K03177
c20265_g1_i2	K03177	truB, PUS4, TRUB1	http://www.genome.jp/dbget-bin/www_bget?ko:K03177
c20601_g1_i1	K13506	GPAT3_4, AGPAT9, AGPAT6	http://www.genome.jp/dbget-bin/www_bget?ko:K13506	path:ko00561;path:ko00564;path:ko01100
c20452_g1_i1	K03131	TAF6	http://www.genome.jp/dbget-bin/www_bget?ko:K03131	path:ko03022;path:ko05168
c19958_g1_i1	K10520	ABTB1, BPOZ	http://www.genome.jp/dbget-bin/www_bget?ko:K10520
c20602_g1_i1	K11798	BRWD1_3	http://www.genome.jp/dbget-bin/www_bget?ko:K11798
c20424_g1_i1	K11674	MCRS1, INO80Q	http://www.genome.jp/dbget-bin/www_bget?ko:K11674	path:ko05168
c20424_g1_i2	K11674	MCRS1, INO80Q	http://www.genome.jp/dbget-bin/www_bget?ko:K11674	path:ko05168
c20350_g1_i1	K10803	XRCC1	http://www.genome.jp/dbget-bin/www_bget?ko:K10803	path:ko03410
c20821_g1_i1	K03626	EGD2, NACA	http://www.genome.jp/dbget-bin/www_bget?ko:K03626
c20435_g1_i1	K09228	KRAB	http://www.genome.jp/dbget-bin/www_bget?ko:K09228
c20892_g1_i1	K14035	NR1IN	http://www.genome.jp/dbget-bin/www_bget?ko:K14035
c20253_g1_i1	K15110	SLC25A21, ODC	http://www.genome.jp/dbget-bin/www_bget?ko:K15110
c20091_g1_i1	K02730	PSMA6	http://www.genome.jp/dbget-bin/www_bget?ko:K02730	path:ko03050
c20495_g1_i1	K09533	DNAJC13	http://www.genome.jp/dbget-bin/www_bget?ko:K09533
c19985_g1_i1	K14453	K14453	http://www.genome.jp/dbget-bin/www_bget?ko:K14453
c19985_g1_i2	K14453	K14453	http://www.genome.jp/dbget-bin/www_bget?ko:K14453
c20367_g1_i1	K16343	PLA2G6, IPLA2	http://www.genome.jp/dbget-bin/www_bget?ko:K16343	path:ko00564;path:ko00565;path:ko00590;path:ko00591;path:ko00592;path:ko01100;path:ko04014;path:ko04270;path:ko04750
c20154_g1_i1	K16865	PDCD4	http://www.genome.jp/dbget-bin/www_bget?ko:K16865	path:ko05205;path:ko05206
c20966_g1_i1	K03249	EIF3F	http://www.genome.jp/dbget-bin/www_bget?ko:K03249	path:ko03013
c20966_g1_i2	K03249	EIF3F	http://www.genome.jp/dbget-bin/www_bget?ko:K03249	path:ko03013
c20843_g1_i1	K15047	HNRNPUL1, E1BAP5	http://www.genome.jp/dbget-bin/www_bget?ko:K15047	path:ko05164
c20863_g1_i1	K09566	PPIG	http://www.genome.jp/dbget-bin/www_bget?ko:K09566
c20863_g1_i2	K13091	RBM39, RNPC2	http://www.genome.jp/dbget-bin/www_bget?ko:K13091
c20301_g1_i1	K17307	FBLN1_2	http://www.genome.jp/dbget-bin/www_bget?ko:K17307
c20780_g1_i1	K00816	CCBL	http://www.genome.jp/dbget-bin/www_bget?ko:K00816	path:ko00380;path:ko00450;path:ko01100;path:ko05204
c20780_g1_i2	K00816	CCBL	http://www.genome.jp/dbget-bin/www_bget?ko:K00816	path:ko00380;path:ko00450;path:ko01100;path:ko05204
c20015_g1_i1	K11654	SMARCA5, SNF2H, ISWI	http://www.genome.jp/dbget-bin/www_bget?ko:K11654
c20015_g1_i2	K11654	SMARCA5, SNF2H, ISWI	http://www.genome.jp/dbget-bin/www_bget?ko:K11654
c20574_g1_i1	K12736	PPWD1	http://www.genome.jp/dbget-bin/www_bget?ko:K12736
c20401_g1_i1	K03250	EIF3E, INT6	http://www.genome.jp/dbget-bin/www_bget?ko:K03250	path:ko03013;path:ko05160
c19976_g1_i1	K15438	AIMP2	http://www.genome.jp/dbget-bin/www_bget?ko:K15438
c20502_g1_i1	K10052	CEBPN	http://www.genome.jp/dbget-bin/www_bget?ko:K10052
c20381_g1_i1	K15414	C1QBP	http://www.genome.jp/dbget-bin/www_bget?ko:K15414	path:ko05168
c20885_g1_i1	K14808	DDX54, DBP10	http://www.genome.jp/dbget-bin/www_bget?ko:K14808
c20480_g1_i1	K09708	ACEH, ACE2	http://www.genome.jp/dbget-bin/www_bget?ko:K09708	path:ko04614;path:ko04974
c20016_g1_i1	K13130	SIP1, GEMIN2	http://www.genome.jp/dbget-bin/www_bget?ko:K13130	path:ko03013
c20332_g1_i1	K03036	PSMD11, RPN6	http://www.genome.jp/dbget-bin/www_bget?ko:K03036	path:ko03050;path:ko05169
c20144_g1_i1	K07555	ATPeAF1, ATPAF1	http://www.genome.jp/dbget-bin/www_bget?ko:K07555
c20883_g1_i1	K14837	NOP12	http://www.genome.jp/dbget-bin/www_bget?ko:K14837
c20090_g1_i1	K13984	TXNDC5, ERP46	http://www.genome.jp/dbget-bin/www_bget?ko:K13984	path:ko04141
c20449_g1_i1	K14455	GOT2	http://www.genome.jp/dbget-bin/www_bget?ko:K14455	path:ko00250;path:ko00270;path:ko00330;path:ko00350;path:ko00360;path:ko00400;path:ko00710;path:ko00950;path:ko00960;path:ko01100;path:ko01110;path:ko01120;path:ko01200;path:ko01210;path:ko01230;path:ko04975
c20161_g1_i1	K10693	MYCBP2, PAM	http://www.genome.jp/dbget-bin/www_bget?ko:K10693
c20541_g1_i1	K05677	ABCD3, PMP70	http://www.genome.jp/dbget-bin/www_bget?ko:K05677	path:ko02010;path:ko04146
c20541_g1_i2	K05677	ABCD3, PMP70	http://www.genome.jp/dbget-bin/www_bget?ko:K05677	path:ko02010;path:ko04146
c20166_g1_i1	K09504	DNAJA3	http://www.genome.jp/dbget-bin/www_bget?ko:K09504	path:ko05203
c20166_g1_i2	K09504	DNAJA3	http://www.genome.jp/dbget-bin/www_bget?ko:K09504	path:ko05203
c20133_g1_i1	K12881	THOC4, ALY	http://www.genome.jp/dbget-bin/www_bget?ko:K12881	path:ko03013;path:ko03015;path:ko03040;path:ko05168
c20693_g1_i1	K16575	ACTR1A, ARP1	http://www.genome.jp/dbget-bin/www_bget?ko:K16575
c20845_g1_i1	K08877	UHMK1, KIS	http://www.genome.jp/dbget-bin/www_bget?ko:K08877
c20845_g1_i3	K08877	UHMK1, KIS	http://www.genome.jp/dbget-bin/www_bget?ko:K08877
c20889_g1_i1	K15362	BRIP1, BACH1, FANCJ	http://www.genome.jp/dbget-bin/www_bget?ko:K15362	path:ko03460
c38806_g1_i1	K07378	NLGN	http://www.genome.jp/dbget-bin/www_bget?ko:K07378	path:ko04514
c38849_g1_i1	K00515	BCMO1, BCDO1	http://www.genome.jp/dbget-bin/www_bget?ko:K00515	path:ko00830;path:ko01100
c38368_g1_i1	K08804	STK17	http://www.genome.jp/dbget-bin/www_bget?ko:K08804
c38521_g1_i1	K05011	CLCN2	http://www.genome.jp/dbget-bin/www_bget?ko:K05011	path:ko04978
c38719_g1_i1	K08858	SBK	http://www.genome.jp/dbget-bin/www_bget?ko:K08858
c38589_g1_i1	K17686	copA, ATP7	http://www.genome.jp/dbget-bin/www_bget?ko:K17686
c38761_g1_i1	K00936	E2.7.3.-	http://www.genome.jp/dbget-bin/www_bget?ko:K00936
c38248_g1_i1	K05746	ENAH, MENA	http://www.genome.jp/dbget-bin/www_bget?ko:K05746	path:ko04810
c38819_g1_i1	K06052	JAGGED	http://www.genome.jp/dbget-bin/www_bget?ko:K06052	path:ko04330
c38775_g1_i1	K01425	glsA, GLS	http://www.genome.jp/dbget-bin/www_bget?ko:K01425	path:ko00250;path:ko00330;path:ko00471;path:ko01100;path:ko04724;path:ko04727;path:ko04964;path:ko05206
c38275_g1_i1	K10151	CCND2	http://www.genome.jp/dbget-bin/www_bget?ko:K10151	path:ko04068;path:ko04110;path:ko04115;path:ko04151;path:ko04310;path:ko04390;path:ko04510;path:ko04630;path:ko04917;path:ko05162;path:ko05166;path:ko05202;path:ko05203;path:ko05206
c38259_g1_i1	K09228	KRAB	http://www.genome.jp/dbget-bin/www_bget?ko:K09228
c38515_g1_i1	K03499	trkA	http://www.genome.jp/dbget-bin/www_bget?ko:K03499
c38371_g1_i1	K10361	MYO15	http://www.genome.jp/dbget-bin/www_bget?ko:K10361
c38465_g1_i1	K10280	FBXL14	http://www.genome.jp/dbget-bin/www_bget?ko:K10280
c38559_g1_i1	K00731	C1GALT1	http://www.genome.jp/dbget-bin/www_bget?ko:K00731	path:ko00512;path:ko01100
c38388_g1_i1	K10119	msmG	http://www.genome.jp/dbget-bin/www_bget?ko:K10119	path:ko02010
c38241_g1_i1	K10361	MYO15	http://www.genome.jp/dbget-bin/www_bget?ko:K10361
c38914_g1_i1	K08483	PTS-EI.PTSI, ptsI	http://www.genome.jp/dbget-bin/www_bget?ko:K08483	path:ko02060
c38987_g1_i1	K05312	CHRNN	http://www.genome.jp/dbget-bin/www_bget?ko:K05312
c38445_g1_i1	K08462	GPR125	http://www.genome.jp/dbget-bin/www_bget?ko:K08462
c38902_g1_i1	K12308	bgaB, lacA	http://www.genome.jp/dbget-bin/www_bget?ko:K12308	path:ko00052
c38143_g1_i1	K00111	glpA, glpD	http://www.genome.jp/dbget-bin/www_bget?ko:K00111	path:ko00564
c38771_g1_i1	K02327	POLD1	http://www.genome.jp/dbget-bin/www_bget?ko:K02327	path:ko00230;path:ko00240;path:ko01100;path:ko03030;path:ko03410;path:ko03420;path:ko03430;path:ko03440;path:ko05166
c38321_g1_i1	K15047	HNRNPUL1, E1BAP5	http://www.genome.jp/dbget-bin/www_bget?ko:K15047	path:ko05164
c38867_g1_i1	K01183	E3.2.1.14	http://www.genome.jp/dbget-bin/www_bget?ko:K01183	path:ko00520;path:ko01110
c38398_g1_i1	K05666	ABCC2	http://www.genome.jp/dbget-bin/www_bget?ko:K05666	path:ko02010;path:ko04976
c38262_g1_i1	K04611	MXR	http://www.genome.jp/dbget-bin/www_bget?ko:K04611
c38751_g1_i1	K02377	TSTA3, fcl	http://www.genome.jp/dbget-bin/www_bget?ko:K02377	path:ko00051;path:ko00520;path:ko01100
c38382_g1_i1	K09228	KRAB	http://www.genome.jp/dbget-bin/www_bget?ko:K09228
c38425_g1_i1	K09228	KRAB	http://www.genome.jp/dbget-bin/www_bget?ko:K09228
c38307_g1_i1	K04307	LGR8	http://www.genome.jp/dbget-bin/www_bget?ko:K04307	path:ko04080
c38198_g1_i1	K03283	HSPA1_8	http://www.genome.jp/dbget-bin/www_bget?ko:K03283	path:ko03040;path:ko04010;path:ko04141;path:ko04144;path:ko04612;path:ko04915;path:ko05134;path:ko05145;path:ko05162;path:ko05164;path:ko05169
c38509_g1_i1	K06103	CASK	http://www.genome.jp/dbget-bin/www_bget?ko:K06103	path:ko04530
c39047_g1_i1	K01687	ilvD	http://www.genome.jp/dbget-bin/www_bget?ko:K01687	path:ko00290;path:ko00770;path:ko01100;path:ko01110;path:ko01210;path:ko01230
c38502_g1_i1	K00106	XDH	http://www.genome.jp/dbget-bin/www_bget?ko:K00106	path:ko00230;path:ko00232;path:ko00983;path:ko01100;path:ko01110;path:ko01120;path:ko04146
c38308_g1_i1	K11422	SETD1, SET1	http://www.genome.jp/dbget-bin/www_bget?ko:K11422	path:ko00310
c38526_g1_i1	K05048	SLC6A15S	http://www.genome.jp/dbget-bin/www_bget?ko:K05048
c38161_g1_i1	K15109	SLC25A20_29, CACT, CACL, CRC1	http://www.genome.jp/dbget-bin/www_bget?ko:K15109
c38552_g1_i1	K09228	KRAB	http://www.genome.jp/dbget-bin/www_bget?ko:K09228
c38424_g1_i1	K01915	glnA	http://www.genome.jp/dbget-bin/www_bget?ko:K01915	path:ko00250;path:ko00330;path:ko00630;path:ko00910;path:ko01100;path:ko01120;path:ko01230;path:ko02020;path:ko04724;path:ko04727
c38393_g1_i1	K02377	TSTA3, fcl	http://www.genome.jp/dbget-bin/www_bget?ko:K02377	path:ko00051;path:ko00520;path:ko01100
c38681_g1_i1	K15109	SLC25A20_29, CACT, CACL, CRC1	http://www.genome.jp/dbget-bin/www_bget?ko:K15109
c38789_g1_i1	K12385	NPC1	http://www.genome.jp/dbget-bin/www_bget?ko:K12385	path:ko04142
c38468_g1_i1	K05011	CLCN2	http://www.genome.jp/dbget-bin/www_bget?ko:K05011	path:ko04978
c39053_g1_i1	K07374	TUBA	http://www.genome.jp/dbget-bin/www_bget?ko:K07374	path:ko04145;path:ko04540;path:ko05130
c38141_g1_i1	K17572	ARFGEF3, KEPI	http://www.genome.jp/dbget-bin/www_bget?ko:K17572
c38816_g1_i1	K09643	TMPRSS13, TMPRSS11	http://www.genome.jp/dbget-bin/www_bget?ko:K09643	path:ko05164
c65211_g1_i1	K01183	E3.2.1.14	http://www.genome.jp/dbget-bin/www_bget?ko:K01183	path:ko00520;path:ko01110
c65324_g1_i1	K11140	ANPEP	http://www.genome.jp/dbget-bin/www_bget?ko:K11140	path:ko00480;path:ko01100;path:ko04614;path:ko04640
c65394_g1_i1	K17495	CSMD	http://www.genome.jp/dbget-bin/www_bget?ko:K17495
c65264_g1_i1	K17341	HMCN	http://www.genome.jp/dbget-bin/www_bget?ko:K17341
c65181_g1_i1	K00627	DLAT, aceF, pdhC	http://www.genome.jp/dbget-bin/www_bget?ko:K00627	path:ko00010;path:ko00020;path:ko00620;path:ko01100;path:ko01110;path:ko01120;path:ko01200
c65391_g1_i1	K05665	ABCC1	http://www.genome.jp/dbget-bin/www_bget?ko:K05665	path:ko02010;path:ko04977;path:ko05206
c65162_g1_i1	K17198	RERGL	http://www.genome.jp/dbget-bin/www_bget?ko:K17198
c65182_g1_i1	K04345	PKA	http://www.genome.jp/dbget-bin/www_bget?ko:K04345	path:ko04010;path:ko04014;path:ko04020;path:ko04024;path:ko04062;path:ko04113;path:ko04114;path:ko04210;path:ko04261;path:ko04270;path:ko04310;path:ko04340;path:ko04540;path:ko04611;path:ko04713;path:ko04720;path:ko04723;path:ko04724;path:ko04725;path:ko04726;path:ko04727;path:ko04728;path:ko04740;path:ko04742;path:ko04750;path:ko04910;path:ko04911;path:ko04912;path:ko04913;path:ko04914;path:ko04…
c65303_g1_i1	K01371	CTSK	http://www.genome.jp/dbget-bin/www_bget?ko:K01371	path:ko04142;path:ko04380;path:ko04620;path:ko05323
c65332_g1_i1	K01187	E3.2.1.20, malZ	http://www.genome.jp/dbget-bin/www_bget?ko:K01187	path:ko00052;path:ko00500;path:ko01100
c65339_g1_i1	K13805	ARR2	http://www.genome.jp/dbget-bin/www_bget?ko:K13805	path:ko04745
c2612_g1_i1	K10742	DNA2	http://www.genome.jp/dbget-bin/www_bget?ko:K10742	path:ko03030
c2612_g1_i2	K10742	DNA2	http://www.genome.jp/dbget-bin/www_bget?ko:K10742	path:ko03030
c3190_g1_i1	K14785	ESF2, ABT1	http://www.genome.jp/dbget-bin/www_bget?ko:K14785
c2936_g1_i1	K03138	TFIIF1, GTF2F1, TFG1	http://www.genome.jp/dbget-bin/www_bget?ko:K03138	path:ko03022
c3300_g1_i1	K01557	FAHD1	http://www.genome.jp/dbget-bin/www_bget?ko:K01557	path:ko00350;path:ko01100;path:ko01120
c2224_g1_i1	K03283	HSPA1_8	http://www.genome.jp/dbget-bin/www_bget?ko:K03283	path:ko03040;path:ko04010;path:ko04141;path:ko04144;path:ko04612;path:ko04915;path:ko05134;path:ko05145;path:ko05162;path:ko05164;path:ko05169
c2797_g1_i1	K00472	E1.14.11.2	http://www.genome.jp/dbget-bin/www_bget?ko:K00472	path:ko00330;path:ko01100
c2367_g1_i1	K15690	RC3H	http://www.genome.jp/dbget-bin/www_bget?ko:K15690
c2273_g1_i1	K09215	OSR, ODD	http://www.genome.jp/dbget-bin/www_bget?ko:K09215
c2974_g1_i1	K00699	UGT	http://www.genome.jp/dbget-bin/www_bget?ko:K00699	path:ko00040;path:ko00053;path:ko00140;path:ko00500;path:ko00830;path:ko00860;path:ko00980;path:ko00982;path:ko00983;path:ko01100;path:ko05204
c2758_g1_i1	K04163	HTR7	http://www.genome.jp/dbget-bin/www_bget?ko:K04163	path:ko04014;path:ko04020;path:ko04080;path:ko04726
c3036_g1_i1	K16684	NF2	http://www.genome.jp/dbget-bin/www_bget?ko:K16684	path:ko04390;path:ko04391
c3170_g1_i1	K09228	KRAB	http://www.genome.jp/dbget-bin/www_bget?ko:K09228
c2712_g1_i1	K03646	tolA	http://www.genome.jp/dbget-bin/www_bget?ko:K03646
c2820_g1_i1	K17341	HMCN	http://www.genome.jp/dbget-bin/www_bget?ko:K17341
c3002_g1_i1	K15259	PARP7S	http://www.genome.jp/dbget-bin/www_bget?ko:K15259
c2605_g1_i1	K17591	RIMBP2	http://www.genome.jp/dbget-bin/www_bget?ko:K17591
c2638_g1_i1	K03466	ftsK, spoIIIE	http://www.genome.jp/dbget-bin/www_bget?ko:K03466
c3181_g1_i1	K10414	DYNC2H, DNCH2	http://www.genome.jp/dbget-bin/www_bget?ko:K10414	path:ko04145;path:ko04962;path:ko05132
c2811_g1_i1	K01081	E3.1.3.5	http://www.genome.jp/dbget-bin/www_bget?ko:K01081	path:ko00230;path:ko00240;path:ko00760;path:ko01100;path:ko01110
c2727_g1_i1	K05727	DOCK3	http://www.genome.jp/dbget-bin/www_bget?ko:K05727
c2717_g1_i1	K01737	queD, ptpS, PTS	http://www.genome.jp/dbget-bin/www_bget?ko:K01737	path:ko00790;path:ko01100
c1991_g1_i1	K05088	ROS1	http://www.genome.jp/dbget-bin/www_bget?ko:K05088	path:ko04013
c3070_g1_i1	K09646	SCPEP1	http://www.genome.jp/dbget-bin/www_bget?ko:K09646
c3070_g1_i2	K09646	SCPEP1	http://www.genome.jp/dbget-bin/www_bget?ko:K09646
c2163_g1_i1	K11985	TRAIP, TRIP	http://www.genome.jp/dbget-bin/www_bget?ko:K11985
c2244_g1_i1	K08069	VNN	http://www.genome.jp/dbget-bin/www_bget?ko:K08069	path:ko00770
c2801_g1_i1	K00933	E2.7.3.2	http://www.genome.jp/dbget-bin/www_bget?ko:K00933	path:ko00330;path:ko01100
c3132_g1_i1	K15294	CPLX1_2	http://www.genome.jp/dbget-bin/www_bget?ko:K15294	path:ko04721
c2518_g1_i1	K02126	ATPeF0A, MTATP6	http://www.genome.jp/dbget-bin/www_bget?ko:K02126	path:ko00190;path:ko01100;path:ko05010;path:ko05012;path:ko05016
c3150_g1_i1	K10745	RNASEH2C	http://www.genome.jp/dbget-bin/www_bget?ko:K10745	path:ko03030
c2793_g1_i1	K09188	MLL3	http://www.genome.jp/dbget-bin/www_bget?ko:K09188	path:ko00310
c2714_g1_i1	K05125	DDR2, TKT	http://www.genome.jp/dbget-bin/www_bget?ko:K05125
c2337_g1_i1	K01464	DPYS, dht, hydA	http://www.genome.jp/dbget-bin/www_bget?ko:K01464	path:ko00240;path:ko00410;path:ko00770;path:ko00983;path:ko01100
c2337_g1_i2	K01464	DPYS, dht, hydA	http://www.genome.jp/dbget-bin/www_bget?ko:K01464	path:ko00240;path:ko00410;path:ko00770;path:ko00983;path:ko01100
c2754_g1_i1	K12891	SFRS2	http://www.genome.jp/dbget-bin/www_bget?ko:K12891	path:ko03040;path:ko05168
c2754_g1_i2	K12891	SFRS2	http://www.genome.jp/dbget-bin/www_bget?ko:K12891	path:ko03040;path:ko05168
c3079_g1_i1	K03849	ALG8	http://www.genome.jp/dbget-bin/www_bget?ko:K03849	path:ko00510;path:ko01100
c2347_g1_i1	K02135	ATPeF1E, ATP5E	http://www.genome.jp/dbget-bin/www_bget?ko:K02135	path:ko00190;path:ko01100;path:ko05010;path:ko05012;path:ko05016
c2760_g1_i1	K01596	E4.1.1.32, pckA, PEPCK	http://www.genome.jp/dbget-bin/www_bget?ko:K01596	path:ko00010;path:ko00020;path:ko00620;path:ko01100;path:ko01110;path:ko01120;path:ko03320;path:ko04068;path:ko04151;path:ko04152;path:ko04910;path:ko04920;path:ko04964
c2253_g1_i1	K09222	REST	http://www.genome.jp/dbget-bin/www_bget?ko:K09222	path:ko05016
c3092_g1_i1	K01480	E3.5.3.11, speB	http://www.genome.jp/dbget-bin/www_bget?ko:K01480	path:ko00330;path:ko01100
c2379_g1_i1	K12374	ARSD_E_F_H	http://www.genome.jp/dbget-bin/www_bget?ko:K12374
c3064_g1_i1	K11253	H3	http://www.genome.jp/dbget-bin/www_bget?ko:K11253	path:ko05034;path:ko05202;path:ko05322
c3211_g1_i1	K03877	B3GALT5	http://www.genome.jp/dbget-bin/www_bget?ko:K03877	path:ko00601;path:ko00603;path:ko01100
c2703_g1_i1	K00500	phhA, PAH	http://www.genome.jp/dbget-bin/www_bget?ko:K00500	path:ko00360;path:ko00400;path:ko01100;path:ko01230
c2722_g1_i1	K01183	E3.2.1.14	http://www.genome.jp/dbget-bin/www_bget?ko:K01183	path:ko00520;path:ko01110
c2722_g1_i2	K01183	E3.2.1.14	http://www.genome.jp/dbget-bin/www_bget?ko:K01183	path:ko00520;path:ko01110
c3168_g1_i1	K03283	HSPA1_8	http://www.genome.jp/dbget-bin/www_bget?ko:K03283	path:ko03040;path:ko04010;path:ko04141;path:ko04144;path:ko04612;path:ko04915;path:ko05134;path:ko05145;path:ko05162;path:ko05164;path:ko05169
c2664_g1_i1	K09708	ACEH, ACE2	http://www.genome.jp/dbget-bin/www_bget?ko:K09708	path:ko04614;path:ko04974
c3242_g1_i1	K13719	OTU1, YOD1	http://www.genome.jp/dbget-bin/www_bget?ko:K13719	path:ko04141
c2206_g1_i1	K17589	RB1CC1	http://www.genome.jp/dbget-bin/www_bget?ko:K17589
c2395_g1_i1	K04079	htpG, HSP90A	http://www.genome.jp/dbget-bin/www_bget?ko:K04079	path:ko04141;path:ko04151;path:ko04612;path:ko04621;path:ko04626;path:ko04914;path:ko04915;path:ko05200;path:ko05215
c2531_g1_i1	K02128	ATPeF0C, ATP5G	http://www.genome.jp/dbget-bin/www_bget?ko:K02128	path:ko00190;path:ko01100;path:ko05010;path:ko05012;path:ko05016
c2942_g1_i1	K02863	RP-L1, MRPL1, rplA	http://www.genome.jp/dbget-bin/www_bget?ko:K02863	path:ko03010
c2362_g1_i1	K03103	MINPP1	http://www.genome.jp/dbget-bin/www_bget?ko:K03103	path:ko00562
c3127_g1_i1	K14545	RRP7	http://www.genome.jp/dbget-bin/www_bget?ko:K14545	path:ko03008
c2961_g1_i1	K17307	FBLN1_2	http://www.genome.jp/dbget-bin/www_bget?ko:K17307
c2508_g1_i1	K09428	ELF1_2_4	http://www.genome.jp/dbget-bin/www_bget?ko:K09428
c2508_g1_i2	K09428	ELF1_2_4	http://www.genome.jp/dbget-bin/www_bget?ko:K09428
c2463_g1_i1	K10649	TRIM9_67	http://www.genome.jp/dbget-bin/www_bget?ko:K10649
c2887_g1_i1	K11421	SETDB	http://www.genome.jp/dbget-bin/www_bget?ko:K11421	path:ko00310
c2887_g1_i2	K11421	SETDB	http://www.genome.jp/dbget-bin/www_bget?ko:K11421	path:ko00310
c3107_g1_i1	K14611	SLC23A1_2, SVCT1_2	http://www.genome.jp/dbget-bin/www_bget?ko:K14611
c2364_g1_i1	K13353	PEX11C	http://www.genome.jp/dbget-bin/www_bget?ko:K13353	path:ko04146
c2364_g1_i2	K13353	PEX11C	http://www.genome.jp/dbget-bin/www_bget?ko:K13353	path:ko04146
c2259_g1_i1	K05667	ABCC3	http://www.genome.jp/dbget-bin/www_bget?ko:K05667	path:ko02010;path:ko04976
c2471_g1_i1	K05719	ITGB1	http://www.genome.jp/dbget-bin/www_bget?ko:K05719	path:ko04015;path:ko04145;path:ko04151;path:ko04360;path:ko04510;path:ko04512;path:ko04514;path:ko04611;path:ko04670;path:ko04810;path:ko05100;path:ko05130;path:ko05131;path:ko05133;path:ko05140;path:ko05145;path:ko05200;path:ko05205;path:ko05222;path:ko05410;path:ko05412;path:ko05414
c2471_g1_i2	K05719	ITGB1	http://www.genome.jp/dbget-bin/www_bget?ko:K05719	path:ko04015;path:ko04145;path:ko04151;path:ko04360;path:ko04510;path:ko04512;path:ko04514;path:ko04611;path:ko04670;path:ko04810;path:ko05100;path:ko05130;path:ko05131;path:ko05133;path:ko05140;path:ko05145;path:ko05200;path:ko05205;path:ko05222;path:ko05410;path:ko05412;path:ko05414
c2560_g1_i1	K02366	EXT1	http://www.genome.jp/dbget-bin/www_bget?ko:K02366	path:ko00534;path:ko01100
c3178_g1_i1	K12374	ARSD_E_F_H	http://www.genome.jp/dbget-bin/www_bget?ko:K12374
c2549_g1_i1	K08807	PIM3	http://www.genome.jp/dbget-bin/www_bget?ko:K08807
c49810_g1_i1	K04962	RYR2	http://www.genome.jp/dbget-bin/www_bget?ko:K04962	path:ko04020;path:ko04024;path:ko04260;path:ko04261;path:ko04713;path:ko04911;path:ko04921;path:ko04972;path:ko05410;path:ko05412;path:ko05414
c50019_g1_i1	K02857	RHBDL1_2_3	http://www.genome.jp/dbget-bin/www_bget?ko:K02857
c49748_g1_i1	K14572	MDN1, REA1	http://www.genome.jp/dbget-bin/www_bget?ko:K14572	path:ko03008
c50075_g1_i1	K11308	MYST1, MOF, KAT8	http://www.genome.jp/dbget-bin/www_bget?ko:K11308
c50026_g1_i1	K16075	MRS2, MFM1	http://www.genome.jp/dbget-bin/www_bget?ko:K16075
c50026_g2_i1	K02174	BR-C	http://www.genome.jp/dbget-bin/www_bget?ko:K02174	path:ko04320
c49957_g1_i1	K04533	HD	http://www.genome.jp/dbget-bin/www_bget?ko:K04533	path:ko05016
c49564_g1_i1	K03110	ftsY	http://www.genome.jp/dbget-bin/www_bget?ko:K03110	path:ko03060;path:ko03070
c49925_g1_i1	K13164	MSL2	http://www.genome.jp/dbget-bin/www_bget?ko:K13164
c49766_g1_i1	K08898	LMTK2	http://www.genome.jp/dbget-bin/www_bget?ko:K08898
c50045_g1_i1	K02214	CDC7	http://www.genome.jp/dbget-bin/www_bget?ko:K02214	path:ko04110;path:ko04111;path:ko04113
c49566_g1_i1	K01135	ARSB	http://www.genome.jp/dbget-bin/www_bget?ko:K01135	path:ko00531;path:ko01100;path:ko04142
c49688_g1_i1	K16677	DACHS	http://www.genome.jp/dbget-bin/www_bget?ko:K16677	path:ko04391
c49690_g1_i1	K17675	SUPV3L1, SUV3	http://www.genome.jp/dbget-bin/www_bget?ko:K17675
c49952_g1_i1	K12380	RASA3	http://www.genome.jp/dbget-bin/www_bget?ko:K12380	path:ko04013;path:ko04014
c49280_g1_i1	K09640	TMPRSS9	http://www.genome.jp/dbget-bin/www_bget?ko:K09640
c49241_g1_i1	K05849	SLC8A, NCX	http://www.genome.jp/dbget-bin/www_bget?ko:K05849	path:ko04020;path:ko04022;path:ko04974
c49236_g1_i1	K13696	ABHD1_3	http://www.genome.jp/dbget-bin/www_bget?ko:K13696
c49164_g1_i1	K10112	msmX, msmK, malK, sugC, ggtA, msiK	http://www.genome.jp/dbget-bin/www_bget?ko:K10112	path:ko02010
c49702_g1_i1	K02868	RP-L11e, RPL11	http://www.genome.jp/dbget-bin/www_bget?ko:K02868	path:ko03010
c49889_g1_i1	K14848	RRB1, GRWD1	http://www.genome.jp/dbget-bin/www_bget?ko:K14848
c50010_g1_i1	K03841	FBP, fbp	http://www.genome.jp/dbget-bin/www_bget?ko:K03841	path:ko00010;path:ko00030;path:ko00051;path:ko00680;path:ko00710;path:ko01100;path:ko01110;path:ko01120;path:ko01200;path:ko04152;path:ko04910
c49797_g1_i1	K08738	CYC	http://www.genome.jp/dbget-bin/www_bget?ko:K08738	path:ko00920;path:ko01100;path:ko01120;path:ko02020;path:ko04115;path:ko04210;path:ko04932;path:ko05010;path:ko05012;path:ko05014;path:ko05016;path:ko05134;path:ko05145;path:ko05152;path:ko05161;path:ko05164;path:ko05168;path:ko05200;path:ko05210;path:ko05222;path:ko05416
c49606_g1_i1	K08807	PIM3	http://www.genome.jp/dbget-bin/www_bget?ko:K08807
c50040_g1_i1	K11255	NCOA2, TIF2, KAT13C	http://www.genome.jp/dbget-bin/www_bget?ko:K11255	path:ko04919
c49435_g1_i1	K01689	ENO, eno	http://www.genome.jp/dbget-bin/www_bget?ko:K01689	path:ko00010;path:ko00680;path:ko01100;path:ko01110;path:ko01120;path:ko01200;path:ko01230;path:ko03018;path:ko04066
c49686_g1_i1	K04962	RYR2	http://www.genome.jp/dbget-bin/www_bget?ko:K04962	path:ko04020;path:ko04024;path:ko04260;path:ko04261;path:ko04713;path:ko04911;path:ko04921;path:ko04972;path:ko05410;path:ko05412;path:ko05414
c49731_g1_i1	K07936	RAN	http://www.genome.jp/dbget-bin/www_bget?ko:K07936	path:ko03008;path:ko03013;path:ko05166;path:ko05169
c49321_g1_i1	K14464	FUT-1, FucTC	http://www.genome.jp/dbget-bin/www_bget?ko:K14464	path:ko00513
c49420_g1_i1	K02035	ABC.PE.S	http://www.genome.jp/dbget-bin/www_bget?ko:K02035
c49647_g1_i1	K09385	FOXG	http://www.genome.jp/dbget-bin/www_bget?ko:K09385	path:ko04068
c49821_g1_i1	K16659	RTN4R, NGR	http://www.genome.jp/dbget-bin/www_bget?ko:K16659
c49767_g1_i1	K11498	CENPE	http://www.genome.jp/dbget-bin/www_bget?ko:K11498
c49753_g1_i1	K03386	E1.11.1.15, PRDX, ahpC	http://www.genome.jp/dbget-bin/www_bget?ko:K03386
c49432_g1_i1	K14464	FUT-1, FucTC	http://www.genome.jp/dbget-bin/www_bget?ko:K14464	path:ko00513
c49729_g1_i1	K16743	ASPM, ASP	http://www.genome.jp/dbget-bin/www_bget?ko:K16743
c50100_g1_i1	K12309	GLB1, ELNR1	http://www.genome.jp/dbget-bin/www_bget?ko:K12309	path:ko00052;path:ko00511;path:ko00531;path:ko00600;path:ko00604;path:ko01100;path:ko04142
c49425_g1_i1	K01360	PCSK2	http://www.genome.jp/dbget-bin/www_bget?ko:K01360
c49910_g1_i1	K00272	DDO	http://www.genome.jp/dbget-bin/www_bget?ko:K00272	path:ko00250;path:ko04146
c49820_g1_i1	K04371	MAPK1_3	http://www.genome.jp/dbget-bin/www_bget?ko:K04371	path:ko04010;path:ko04012;path:ko04013;path:ko04014;path:ko04015;path:ko04022;path:ko04024;path:ko04062;path:ko04066;path:ko04068;path:ko04114;path:ko04150;path:ko04151;path:ko04261;path:ko04270;path:ko04320;path:ko04350;path:ko04360;path:ko04370;path:ko04380;path:ko04510;path:ko04520;path:ko04540;path:ko04611;path:ko04620;path:ko04621;path:ko04650;path:ko04660;path:ko04662;path:ko04664;path:ko04…
c49115_g1_i1	K09228	KRAB	http://www.genome.jp/dbget-bin/www_bget?ko:K09228
c49696_g1_i1	K02974	RP-S24e, RPS24	http://www.genome.jp/dbget-bin/www_bget?ko:K02974	path:ko03010
c49833_g1_i1	K03231	EEF1A	http://www.genome.jp/dbget-bin/www_bget?ko:K03231	path:ko03013;path:ko05134
c49742_g1_i1	K10627	RAD18	http://www.genome.jp/dbget-bin/www_bget?ko:K10627
c49639_g1_i1	K07817	PTPRN	http://www.genome.jp/dbget-bin/www_bget?ko:K07817	path:ko04940
c49355_g1_i1	K07172	K07172	http://www.genome.jp/dbget-bin/www_bget?ko:K07172
c49616_g1_i1	K05746	ENAH, MENA	http://www.genome.jp/dbget-bin/www_bget?ko:K05746	path:ko04810
c49476_g1_i1	K06820	PLXNA	http://www.genome.jp/dbget-bin/www_bget?ko:K06820	path:ko04360
c49228_g1_i1	K12199	VTA1, LIP5	http://www.genome.jp/dbget-bin/www_bget?ko:K12199	path:ko04144
c49523_g1_i1	K07374	TUBA	http://www.genome.jp/dbget-bin/www_bget?ko:K07374	path:ko04145;path:ko04540;path:ko05130
c49799_g1_i1	K00272	DDO	http://www.genome.jp/dbget-bin/www_bget?ko:K00272	path:ko00250;path:ko04146
c49842_g1_i1	K15623	SS18, SSXT, SYT	http://www.genome.jp/dbget-bin/www_bget?ko:K15623	path:ko05202
c49923_g1_i1	K00314	SARDH	http://www.genome.jp/dbget-bin/www_bget?ko:K00314	path:ko00260;path:ko01100
c49258_g1_i1	K00888	PI4K	http://www.genome.jp/dbget-bin/www_bget?ko:K00888	path:ko00562;path:ko01100;path:ko04070
c49931_g1_i1	K11855	USP36_42	http://www.genome.jp/dbget-bin/www_bget?ko:K11855
c49152_g1_i1	K13356	FAR	http://www.genome.jp/dbget-bin/www_bget?ko:K13356	path:ko00073;path:ko04146
c49698_g1_i1	K14258	TRET1	http://www.genome.jp/dbget-bin/www_bget?ko:K14258
c49359_g1_i1	K01307	GGH	http://www.genome.jp/dbget-bin/www_bget?ko:K01307	path:ko00790
c49907_g1_i1	K05328	TRPCN	http://www.genome.jp/dbget-bin/www_bget?ko:K05328	path:ko04745
c49337_g1_i1	K12374	ARSD_E_F_H	http://www.genome.jp/dbget-bin/www_bget?ko:K12374
c27130_g1_i1	K01201	GBA, srfJ	http://www.genome.jp/dbget-bin/www_bget?ko:K01201	path:ko00511;path:ko00600;path:ko01100;path:ko04142
c27550_g1_i1	K05657	ABCB10	http://www.genome.jp/dbget-bin/www_bget?ko:K05657	path:ko02010
c27529_g1_i1	K07511	ECHS1	http://www.genome.jp/dbget-bin/www_bget?ko:K07511	path:ko00062;path:ko00071;path:ko00280;path:ko00310;path:ko00362;path:ko00380;path:ko00410;path:ko00627;path:ko00640;path:ko00650;path:ko00930;path:ko01100;path:ko01110;path:ko01120;path:ko01200;path:ko01212
c28068_g1_i1	K01408	IDE, ide	http://www.genome.jp/dbget-bin/www_bget?ko:K01408	path:ko05010
c28068_g1_i2	K01408	IDE, ide	http://www.genome.jp/dbget-bin/www_bget?ko:K01408	path:ko05010
c27342_g1_i1	K09237	K09237	http://www.genome.jp/dbget-bin/www_bget?ko:K09237
c27976_g1_i1	K08486	STX1B_2_3	http://www.genome.jp/dbget-bin/www_bget?ko:K08486	path:ko04130;path:ko04721
c27132_g1_i1	K08694	SPDY, RINGO	http://www.genome.jp/dbget-bin/www_bget?ko:K08694	path:ko04114;path:ko04914
c27132_g1_i2	K08694	SPDY, RINGO	http://www.genome.jp/dbget-bin/www_bget?ko:K08694	path:ko04114;path:ko04914
c27664_g1_i1	K14325	RNPS1	http://www.genome.jp/dbget-bin/www_bget?ko:K14325	path:ko03013;path:ko03015
c27583_g1_i1	K11340	ACTL6A, INO80K	http://www.genome.jp/dbget-bin/www_bget?ko:K11340
c27446_g2_i1	K10744	RNASEH2B	http://www.genome.jp/dbget-bin/www_bget?ko:K10744	path:ko03030
c27844_g1_i1	K05012	CLCN3_4_5	http://www.genome.jp/dbget-bin/www_bget?ko:K05012
c27844_g1_i2	K05012	CLCN3_4_5	http://www.genome.jp/dbget-bin/www_bget?ko:K05012
c27896_g1_i1	K16365	SGTA	http://www.genome.jp/dbget-bin/www_bget?ko:K16365
c27965_g1_i1	K03539	RPP1, RPP30	http://www.genome.jp/dbget-bin/www_bget?ko:K03539	path:ko03008;path:ko03013
c27965_g1_i2	K03539	RPP1, RPP30	http://www.genome.jp/dbget-bin/www_bget?ko:K03539	path:ko03008;path:ko03013
c27398_g1_i1	K02154	ATPeVI, ATP6N1A	http://www.genome.jp/dbget-bin/www_bget?ko:K02154	path:ko00190;path:ko01100;path:ko04142;path:ko04145;path:ko04721;path:ko04966;path:ko05110;path:ko05120;path:ko05152;path:ko05323
c27398_g1_i2	K02154	ATPeVI, ATP6N1A	http://www.genome.jp/dbget-bin/www_bget?ko:K02154	path:ko00190;path:ko01100;path:ko04142;path:ko04145;path:ko04721;path:ko04966;path:ko05110;path:ko05120;path:ko05152;path:ko05323
c27398_g1_i3	K02154	ATPeVI, ATP6N1A	http://www.genome.jp/dbget-bin/www_bget?ko:K02154	path:ko00190;path:ko01100;path:ko04142;path:ko04145;path:ko04721;path:ko04966;path:ko05110;path:ko05120;path:ko05152;path:ko05323
c28102_g1_i1	K01669	E4.1.99.3, phrB	http://www.genome.jp/dbget-bin/www_bget?ko:K01669
c28102_g1_i2	K01669	E4.1.99.3, phrB	http://www.genome.jp/dbget-bin/www_bget?ko:K01669
c28102_g1_i3	K01669	E4.1.99.3, phrB	http://www.genome.jp/dbget-bin/www_bget?ko:K01669
c27672_g4_i1	K09222	REST	http://www.genome.jp/dbget-bin/www_bget?ko:K09222	path:ko05016
c27672_g4_i2	K09222	REST	http://www.genome.jp/dbget-bin/www_bget?ko:K09222	path:ko05016
c27791_g1_i1	K09228	KRAB	http://www.genome.jp/dbget-bin/www_bget?ko:K09228
c27791_g2_i1	K09228	KRAB	http://www.genome.jp/dbget-bin/www_bget?ko:K09228
c27662_g1_i1	K16601	TTLL4	http://www.genome.jp/dbget-bin/www_bget?ko:K16601
c27662_g1_i2	K16601	TTLL4	http://www.genome.jp/dbget-bin/www_bget?ko:K16601
c27250_g1_i1	K13982	DDX4, VASA	http://www.genome.jp/dbget-bin/www_bget?ko:K13982
c27250_g1_i2	K13982	DDX4, VASA	http://www.genome.jp/dbget-bin/www_bget?ko:K13982
c27532_g1_i1	K11840	USP9_24	http://www.genome.jp/dbget-bin/www_bget?ko:K11840
c27532_g1_i2	K11840	USP9_24	http://www.genome.jp/dbget-bin/www_bget?ko:K11840
c27288_g1_i1	K10443	KLHL2_3	http://www.genome.jp/dbget-bin/www_bget?ko:K10443
c27247_g1_i1	K00940	E2.7.4.6, ndk	http://www.genome.jp/dbget-bin/www_bget?ko:K00940	path:ko00230;path:ko00240;path:ko01100;path:ko01110
c27247_g1_i2	K00940	E2.7.4.6, ndk	http://www.genome.jp/dbget-bin/www_bget?ko:K00940	path:ko00230;path:ko00240;path:ko01100;path:ko01110
c27643_g1_i1	K14555	UTP13, TBL3	http://www.genome.jp/dbget-bin/www_bget?ko:K14555	path:ko03008
c27148_g1_i1	K11838	USP7, UBP15	http://www.genome.jp/dbget-bin/www_bget?ko:K11838	path:ko04068;path:ko05168;path:ko05169;path:ko05203
c27801_g1_i1	K07763	MMP14	http://www.genome.jp/dbget-bin/www_bget?ko:K07763	path:ko04668;path:ko04912
c27801_g1_i2	K07763	MMP14	http://www.genome.jp/dbget-bin/www_bget?ko:K07763	path:ko04668;path:ko04912
c27412_g1_i1	K09228	KRAB	http://www.genome.jp/dbget-bin/www_bget?ko:K09228
c27819_g2_i1	K16729	CHORDC1, CHP1	http://www.genome.jp/dbget-bin/www_bget?ko:K16729
c27819_g5_i1	K16729	CHORDC1, CHP1	http://www.genome.jp/dbget-bin/www_bget?ko:K16729
c27303_g1_i1	K07899	RAB9A, RAB9	http://www.genome.jp/dbget-bin/www_bget?ko:K07899	path:ko05162
c27999_g1_i1	K05309	PTGES2	http://www.genome.jp/dbget-bin/www_bget?ko:K05309	path:ko00590;path:ko01100
c27183_g1_i1	K10585	UBE2Z	http://www.genome.jp/dbget-bin/www_bget?ko:K10585	path:ko04120
c27183_g1_i2	K10585	UBE2Z	http://www.genome.jp/dbget-bin/www_bget?ko:K10585	path:ko04120
c27172_g2_i1	K10902	RECQL5	http://www.genome.jp/dbget-bin/www_bget?ko:K10902
c27171_g1_i1	K02207	UBE2R, UBC3, CDC34	http://www.genome.jp/dbget-bin/www_bget?ko:K02207	path:ko04120;path:ko05168
c27900_g1_i1	K04534	GNAO, G-ALPHA-O	http://www.genome.jp/dbget-bin/www_bget?ko:K04534	path:ko04015;path:ko04713;path:ko04723;path:ko04724;path:ko04725;path:ko04726;path:ko04727;path:ko04728;path:ko04730;path:ko04915;path:ko04916;path:ko04921;path:ko05032;path:ko05034;path:ko05142;path:ko05145
c27900_g1_i2	K04534	GNAO, G-ALPHA-O	http://www.genome.jp/dbget-bin/www_bget?ko:K04534	path:ko04015;path:ko04713;path:ko04723;path:ko04724;path:ko04725;path:ko04726;path:ko04727;path:ko04728;path:ko04730;path:ko04915;path:ko04916;path:ko04921;path:ko05032;path:ko05034;path:ko05142;path:ko05145
c27939_g1_i1	K09341	MSX	http://www.genome.jp/dbget-bin/www_bget?ko:K09341	path:ko05166
c27564_g1_i1	K07375	TUBB	http://www.genome.jp/dbget-bin/www_bget?ko:K07375	path:ko04145;path:ko04540;path:ko05130
c27507_g1_i1	K12178	COPS4, CSN4	http://www.genome.jp/dbget-bin/www_bget?ko:K12178
c27740_g1_i1	K01897	ACSL, fadD	http://www.genome.jp/dbget-bin/www_bget?ko:K01897	path:ko00061;path:ko00071;path:ko01100;path:ko01212;path:ko03320;path:ko04146;path:ko04920
c27994_g1_i1	K09542	CRYAB	http://www.genome.jp/dbget-bin/www_bget?ko:K09542	path:ko04141
c27994_g1_i2	K09542	CRYAB	http://www.genome.jp/dbget-bin/www_bget?ko:K09542	path:ko04141
c27953_g1_i1	K13147	INTS10	http://www.genome.jp/dbget-bin/www_bget?ko:K13147
c27347_g1_i1	K05030	CLCA4	http://www.genome.jp/dbget-bin/www_bget?ko:K05030	path:ko04740;path:ko04972
c27347_g1_i3	K05030	CLCA4	http://www.genome.jp/dbget-bin/www_bget?ko:K05030	path:ko04740;path:ko04972
c27897_g1_i1	K03217	yidC, spoIIIJ, OXA1	http://www.genome.jp/dbget-bin/www_bget?ko:K03217	path:ko03060;path:ko03070
c28121_g1_i1	K07890	RAB21	http://www.genome.jp/dbget-bin/www_bget?ko:K07890
c27274_g1_i1	K06641	CHK2	http://www.genome.jp/dbget-bin/www_bget?ko:K06641	path:ko04110;path:ko04111;path:ko04115;path:ko05166
c27625_g1_i1	K09228	KRAB	http://www.genome.jp/dbget-bin/www_bget?ko:K09228
c27695_g1_i1	K01435	BTD	http://www.genome.jp/dbget-bin/www_bget?ko:K01435	path:ko00780;path:ko01100;path:ko04977
c27495_g1_i1	K05330	KCNJN	http://www.genome.jp/dbget-bin/www_bget?ko:K05330
c27942_g1_i1	K04362	FGFR1	http://www.genome.jp/dbget-bin/www_bget?ko:K04362	path:ko04010;path:ko04014;path:ko04015;path:ko04151;path:ko04520;path:ko04810;path:ko05200;path:ko05205;path:ko05215;path:ko05218
c27942_g1_i2	K05093	FGFR2	http://www.genome.jp/dbget-bin/www_bget?ko:K05093	path:ko04010;path:ko04014;path:ko04015;path:ko04144;path:ko04151;path:ko04810;path:ko05200;path:ko05215
c27677_g1_i1	K10252	BCDO2	http://www.genome.jp/dbget-bin/www_bget?ko:K10252
c28071_g1_i1	K14613	SLC46A1_3	http://www.genome.jp/dbget-bin/www_bget?ko:K14613
c27951_g1_i1	K17553	PPP1R11	http://www.genome.jp/dbget-bin/www_bget?ko:K17553
c27959_g1_i1	K17767	AIP, XAP2	http://www.genome.jp/dbget-bin/www_bget?ko:K17767
c27105_g1_i1	K15421	SERGEF	http://www.genome.jp/dbget-bin/www_bget?ko:K15421
c27353_g1_i1	K12310	CTBS	http://www.genome.jp/dbget-bin/www_bget?ko:K12310
c27348_g1_i1	K15105	SLC25A12_13, AGC	http://www.genome.jp/dbget-bin/www_bget?ko:K15105
c28062_g1_i1	K13959	KLHL38	http://www.genome.jp/dbget-bin/www_bget?ko:K13959
c28062_g1_i2	K13959	KLHL38	http://www.genome.jp/dbget-bin/www_bget?ko:K13959
c27255_g1_i1	K14797	ENP1, BYSL	http://www.genome.jp/dbget-bin/www_bget?ko:K14797
c27739_g1_i1	K10395	KIF4S	http://www.genome.jp/dbget-bin/www_bget?ko:K10395
c27541_g1_i1	K05863	SLC25A4S, ANT	http://www.genome.jp/dbget-bin/www_bget?ko:K05863	path:ko04020;path:ko04022;path:ko05012;path:ko05016;path:ko05166
c27755_g1_i3	K09228	KRAB	http://www.genome.jp/dbget-bin/www_bget?ko:K09228
c27755_g1_i4	K09228	KRAB	http://www.genome.jp/dbget-bin/www_bget?ko:K09228
c27755_g1_i5	K09228	KRAB	http://www.genome.jp/dbget-bin/www_bget?ko:K09228
c27631_g1_i1	K09534	DNAJC14	http://www.genome.jp/dbget-bin/www_bget?ko:K09534
c27954_g1_i1	K10591	NEDD4, RSP5	http://www.genome.jp/dbget-bin/www_bget?ko:K10591	path:ko04120;path:ko04144;path:ko05169
c27954_g1_i2	K10591	NEDD4, RSP5	http://www.genome.jp/dbget-bin/www_bget?ko:K10591	path:ko04120;path:ko04144;path:ko05169
c27954_g1_i3	K10591	NEDD4, RSP5	http://www.genome.jp/dbget-bin/www_bget?ko:K10591	path:ko04120;path:ko04144;path:ko05169
c28079_g2_i1	K09037	MAFF_G_K	http://www.genome.jp/dbget-bin/www_bget?ko:K09037
c28079_g2_i2	K09037	MAFF_G_K	http://www.genome.jp/dbget-bin/www_bget?ko:K09037
c27593_g1_i1	K07834	RALA	http://www.genome.jp/dbget-bin/www_bget?ko:K07834	path:ko04014;path:ko04015;path:ko05200;path:ko05212
c27593_g1_i2	K07834	RALA	http://www.genome.jp/dbget-bin/www_bget?ko:K07834	path:ko04014;path:ko04015;path:ko05200;path:ko05212
c27589_g1_i1	K01784	galE, GALE	http://www.genome.jp/dbget-bin/www_bget?ko:K01784	path:ko00052;path:ko00520;path:ko01100;path:ko01110
c27209_g1_i1	K13139	INTS2	http://www.genome.jp/dbget-bin/www_bget?ko:K13139
c27567_g1_i1	K17769	TOM22	http://www.genome.jp/dbget-bin/www_bget?ko:K17769
c27354_g1_i1	K06066	CIR	http://www.genome.jp/dbget-bin/www_bget?ko:K06066	path:ko04330
c27443_g1_i1	K12735	PPIL4	http://www.genome.jp/dbget-bin/www_bget?ko:K12735
c27894_g1_i1	K13963	SERPINB	http://www.genome.jp/dbget-bin/www_bget?ko:K13963	path:ko05146
c27894_g1_i2	K13963	SERPINB	http://www.genome.jp/dbget-bin/www_bget?ko:K13963	path:ko05146
c27894_g1_i3	K13963	SERPINB	http://www.genome.jp/dbget-bin/www_bget?ko:K13963	path:ko05146
c27894_g1_i4	K13963	SERPINB	http://www.genome.jp/dbget-bin/www_bget?ko:K13963	path:ko05146
c28074_g1_i1	K01514	PPX1	http://www.genome.jp/dbget-bin/www_bget?ko:K01514	path:ko00230
c27784_g1_i1	K00741	B3GNT1, B3GNT2	http://www.genome.jp/dbget-bin/www_bget?ko:K00741	path:ko00533;path:ko00601;path:ko01100
c27784_g1_i2	K00741	B3GNT1, B3GNT2	http://www.genome.jp/dbget-bin/www_bget?ko:K00741	path:ko00533;path:ko00601;path:ko01100
c27784_g1_i3	K00741	B3GNT1, B3GNT2	http://www.genome.jp/dbget-bin/www_bget?ko:K00741	path:ko00533;path:ko00601;path:ko01100
c27221_g1_i1	K12893	SFRS4_5_6	http://www.genome.jp/dbget-bin/www_bget?ko:K12893	path:ko03040;path:ko05168
c27572_g1_i1	K09275	TFCP2	http://www.genome.jp/dbget-bin/www_bget?ko:K09275
c27572_g1_i2	K09275	TFCP2	http://www.genome.jp/dbget-bin/www_bget?ko:K09275
c27572_g1_i3	K09275	TFCP2	http://www.genome.jp/dbget-bin/www_bget?ko:K09275
c27747_g1_i1	K01301	E3.4.17.21	http://www.genome.jp/dbget-bin/www_bget?ko:K01301
c27606_g1_i1	K02353	DVL	http://www.genome.jp/dbget-bin/www_bget?ko:K02353	path:ko04310;path:ko04330;path:ko04390;path:ko04916;path:ko05166;path:ko05200;path:ko05217
c27606_g1_i2	K02353	DVL	http://www.genome.jp/dbget-bin/www_bget?ko:K02353	path:ko04310;path:ko04330;path:ko04390;path:ko04916;path:ko05166;path:ko05200;path:ko05217
c27276_g1_i1	K03024	RPC31, POLR3G	http://www.genome.jp/dbget-bin/www_bget?ko:K03024	path:ko00230;path:ko00240;path:ko01100;path:ko03020;path:ko04623;path:ko05169
c27651_g1_i2	K00889	E2.7.1.68, PIP5K	http://www.genome.jp/dbget-bin/www_bget?ko:K00889	path:ko00562;path:ko01100;path:ko04070;path:ko04144;path:ko04666;path:ko04810
c27651_g1_i3	K00889	E2.7.1.68, PIP5K	http://www.genome.jp/dbget-bin/www_bget?ko:K00889	path:ko00562;path:ko01100;path:ko04070;path:ko04144;path:ko04666;path:ko04810
c27856_g1_i1	K10146	CCNG2	http://www.genome.jp/dbget-bin/www_bget?ko:K10146	path:ko04068;path:ko04115
c28031_g1_i1	K14293	KPNB1	http://www.genome.jp/dbget-bin/www_bget?ko:K14293	path:ko03013
c28031_g1_i2	K14293	KPNB1	http://www.genome.jp/dbget-bin/www_bget?ko:K14293	path:ko03013
c27809_g1_i1	K08202	SLC22A4_5, OCTN	http://www.genome.jp/dbget-bin/www_bget?ko:K08202
c27512_g1_i1	K15340	DCLRE1A, SNM1A, PSO2	http://www.genome.jp/dbget-bin/www_bget?ko:K15340
c28056_g1_i1	K14589	FTSJD2, MTR1	http://www.genome.jp/dbget-bin/www_bget?ko:K14589
c27206_g1_i1	K13963	SERPINB	http://www.genome.jp/dbget-bin/www_bget?ko:K13963	path:ko05146
c27769_g1_i1	K10373	TPM1	http://www.genome.jp/dbget-bin/www_bget?ko:K10373	path:ko04260;path:ko04261;path:ko05206;path:ko05410;path:ko05414
c27769_g1_i2	K10373	TPM1	http://www.genome.jp/dbget-bin/www_bget?ko:K10373	path:ko04260;path:ko04261;path:ko05206;path:ko05410;path:ko05414
c27769_g1_i3	K10373	TPM1	http://www.genome.jp/dbget-bin/www_bget?ko:K10373	path:ko04260;path:ko04261;path:ko05206;path:ko05410;path:ko05414
c27769_g1_i4	K10373	TPM1	http://www.genome.jp/dbget-bin/www_bget?ko:K10373	path:ko04260;path:ko04261;path:ko05206;path:ko05410;path:ko05414
c27769_g1_i5	K10373	TPM1	http://www.genome.jp/dbget-bin/www_bget?ko:K10373	path:ko04260;path:ko04261;path:ko05206;path:ko05410;path:ko05414
c27769_g1_i6	K10373	TPM1	http://www.genome.jp/dbget-bin/www_bget?ko:K10373	path:ko04260;path:ko04261;path:ko05206;path:ko05410;path:ko05414
c27134_g1_i1	K17404	MRPS25	http://www.genome.jp/dbget-bin/www_bget?ko:K17404
c27871_g1_i1	K13095	SF1	http://www.genome.jp/dbget-bin/www_bget?ko:K13095
c27871_g1_i2	K13095	SF1	http://www.genome.jp/dbget-bin/www_bget?ko:K13095
c27871_g1_i3	K13095	SF1	http://www.genome.jp/dbget-bin/www_bget?ko:K13095
c27510_g2_i1	K15101	SLC25A2_15, ORNT	http://www.genome.jp/dbget-bin/www_bget?ko:K15101
c27510_g2_i2	K15101	SLC25A2_15, ORNT	http://www.genome.jp/dbget-bin/www_bget?ko:K15101
c27938_g1_i2	K14945	QKI	http://www.genome.jp/dbget-bin/www_bget?ko:K14945
c27938_g1_i3	K14945	QKI	http://www.genome.jp/dbget-bin/www_bget?ko:K14945
c27938_g1_i4	K14945	QKI	http://www.genome.jp/dbget-bin/www_bget?ko:K14945
c27248_g1_i1	K02098	SPIR	http://www.genome.jp/dbget-bin/www_bget?ko:K02098	path:ko04320
c27248_g1_i2	K02098	SPIR	http://www.genome.jp/dbget-bin/www_bget?ko:K02098	path:ko04320
c27429_g1_i1	K06519	SLC3A2, MDU1	http://www.genome.jp/dbget-bin/www_bget?ko:K06519	path:ko04974
c28094_g1_i1	K09341	MSX	http://www.genome.jp/dbget-bin/www_bget?ko:K09341	path:ko05166
c27122_g1_i1	K03870	CUL2	http://www.genome.jp/dbget-bin/www_bget?ko:K03870	path:ko04066;path:ko04120;path:ko05200;path:ko05211
c27122_g1_i2	K03870	CUL2	http://www.genome.jp/dbget-bin/www_bget?ko:K03870	path:ko04066;path:ko04120;path:ko05200;path:ko05211
c27234_g1_i1	K01183	E3.2.1.14	http://www.genome.jp/dbget-bin/www_bget?ko:K01183	path:ko00520;path:ko01110
c28039_g1_i1	K00472	E1.14.11.2	http://www.genome.jp/dbget-bin/www_bget?ko:K00472	path:ko00330;path:ko01100
c27489_g1_i1	K17617	CTDNEP1, DULLARD, NEM1	http://www.genome.jp/dbget-bin/www_bget?ko:K17617
c27568_g1_i1	K02174	BR-C	http://www.genome.jp/dbget-bin/www_bget?ko:K02174	path:ko04320
c27568_g1_i2	K02174	BR-C	http://www.genome.jp/dbget-bin/www_bget?ko:K02174	path:ko04320
c27568_g1_i3	K02174	BR-C	http://www.genome.jp/dbget-bin/www_bget?ko:K02174	path:ko04320
c27568_g1_i4	K02174	BR-C	http://www.genome.jp/dbget-bin/www_bget?ko:K02174	path:ko04320
c27568_g1_i5	K02174	BR-C	http://www.genome.jp/dbget-bin/www_bget?ko:K02174	path:ko04320
c27297_g1_i1	K17419	MRPL38	http://www.genome.jp/dbget-bin/www_bget?ko:K17419
c27498_g1_i1	K13116	DDX41, ABS	http://www.genome.jp/dbget-bin/www_bget?ko:K13116
c27637_g1_i1	K00311	ETFDH	http://www.genome.jp/dbget-bin/www_bget?ko:K00311
c27803_g1_i1	K04255	OPN4, Rh2_7	http://www.genome.jp/dbget-bin/www_bget?ko:K04255
c27803_g2_i1	K04255	OPN4, Rh2_7	http://www.genome.jp/dbget-bin/www_bget?ko:K04255
c27803_g2_i2	K04255	OPN4, Rh2_7	http://www.genome.jp/dbget-bin/www_bget?ko:K04255
c27757_g1_i1	K04513	RHOA	http://www.genome.jp/dbget-bin/www_bget?ko:K04513	path:ko04011;path:ko04014;path:ko04015;path:ko04022;path:ko04024;path:ko04062;path:ko04144;path:ko04270;path:ko04310;path:ko04350;path:ko04360;path:ko04510;path:ko04520;path:ko04530;path:ko04611;path:ko04660;path:ko04670;path:ko04722;path:ko04810;path:ko04921;path:ko04972;path:ko05100;path:ko05130;path:ko05133;path:ko05152;path:ko05200;path:ko05203;path:ko05205;path:ko05206;path:ko05210
c27524_g1_i1	K13113	UBL5, HUB1	http://www.genome.jp/dbget-bin/www_bget?ko:K13113
c27902_g1_i1	K03163	TOP1	http://www.genome.jp/dbget-bin/www_bget?ko:K03163
c27243_g1_i1	K10691	UBR4, ZUBR1	http://www.genome.jp/dbget-bin/www_bget?ko:K10691	path:ko05203
c27687_g1_i1	K01194	E3.2.1.28, treA, treF	http://www.genome.jp/dbget-bin/www_bget?ko:K01194	path:ko00500;path:ko01100
c27687_g2_i1	K01194	E3.2.1.28, treA, treF	http://www.genome.jp/dbget-bin/www_bget?ko:K01194	path:ko00500;path:ko01100
c27760_g1_i1	K15119	SLC25A39_40	http://www.genome.jp/dbget-bin/www_bget?ko:K15119
c27760_g1_i2	K15119	SLC25A39_40	http://www.genome.jp/dbget-bin/www_bget?ko:K15119
c27136_g1_i1	K14563	NOP1, FBL	http://www.genome.jp/dbget-bin/www_bget?ko:K14563	path:ko03008
c27182_g1_i1	K07753	PECR	http://www.genome.jp/dbget-bin/www_bget?ko:K07753	path:ko01040;path:ko01100;path:ko01212;path:ko04146
c27182_g1_i2	K07753	PECR	http://www.genome.jp/dbget-bin/www_bget?ko:K07753	path:ko01040;path:ko01100;path:ko01212;path:ko04146
c27227_g1_i1	K01183	E3.2.1.14	http://www.genome.jp/dbget-bin/www_bget?ko:K01183	path:ko00520;path:ko01110
c27904_g2_i1	K09228	KRAB	http://www.genome.jp/dbget-bin/www_bget?ko:K09228
c27927_g1_i1	K03138	TFIIF1, GTF2F1, TFG1	http://www.genome.jp/dbget-bin/www_bget?ko:K03138	path:ko03022
c28022_g1_i1	K08956	AFG3	http://www.genome.jp/dbget-bin/www_bget?ko:K08956
c27679_g1_i1	K15430	TRM11, TRMT11	http://www.genome.jp/dbget-bin/www_bget?ko:K15430
c27728_g1_i1	K07151	STT3	http://www.genome.jp/dbget-bin/www_bget?ko:K07151	path:ko00510;path:ko00513;path:ko01100;path:ko04141
c27240_g1_i1	K17973	NAA25, MDM20	http://www.genome.jp/dbget-bin/www_bget?ko:K17973
c27176_g1_i1	K15170	MED27	http://www.genome.jp/dbget-bin/www_bget?ko:K15170	path:ko04919
c27557_g1_i1	K00161	PDHA, pdhA	http://www.genome.jp/dbget-bin/www_bget?ko:K00161	path:ko00010;path:ko00020;path:ko00620;path:ko01100;path:ko01110;path:ko01120;path:ko01200;path:ko04066
c27064_g1_i1	K14946	RBFOX, FOX	http://www.genome.jp/dbget-bin/www_bget?ko:K14946
c27064_g1_i2	K14946	RBFOX, FOX	http://www.genome.jp/dbget-bin/www_bget?ko:K14946
c27064_g1_i3	K14946	RBFOX, FOX	http://www.genome.jp/dbget-bin/www_bget?ko:K14946
c27064_g1_i4	K14946	RBFOX, FOX	http://www.genome.jp/dbget-bin/www_bget?ko:K14946
c27064_g1_i5	K14946	RBFOX, FOX	http://www.genome.jp/dbget-bin/www_bget?ko:K14946
c27064_g1_i6	K14946	RBFOX, FOX	http://www.genome.jp/dbget-bin/www_bget?ko:K14946
c27596_g1_i1	K09228	KRAB	http://www.genome.jp/dbget-bin/www_bget?ko:K09228
c27596_g2_i1	K12589	RRP42, EXOSC7	http://www.genome.jp/dbget-bin/www_bget?ko:K12589	path:ko03018
c27596_g2_i2	K12589	RRP42, EXOSC7	http://www.genome.jp/dbget-bin/www_bget?ko:K12589	path:ko03018
c27596_g1_i2	K09228	KRAB	http://www.genome.jp/dbget-bin/www_bget?ko:K09228
c27648_g1_i1	K14294	WIBG, PYM	http://www.genome.jp/dbget-bin/www_bget?ko:K14294	path:ko03013;path:ko03015
c27208_g1_i1	K14406	CSTF1	http://www.genome.jp/dbget-bin/www_bget?ko:K14406	path:ko03015
c27377_g1_i1	K10149	TP63	http://www.genome.jp/dbget-bin/www_bget?ko:K10149	path:ko04391;path:ko05206
c27377_g1_i2	K10149	TP63	http://www.genome.jp/dbget-bin/www_bget?ko:K10149	path:ko04391;path:ko05206
c27377_g1_i3	K10149	TP63	http://www.genome.jp/dbget-bin/www_bget?ko:K10149	path:ko04391;path:ko05206
c27635_g2_i1	K11478	JARID2, JMJ	http://www.genome.jp/dbget-bin/www_bget?ko:K11478
c27252_g1_i1	K13343	PEX14	http://www.genome.jp/dbget-bin/www_bget?ko:K13343	path:ko04146
c27870_g1_i1	K12599	SKI2, SKIV2L	http://www.genome.jp/dbget-bin/www_bget?ko:K12599	path:ko03018
c27870_g1_i2	K12599	SKI2, SKIV2L	http://www.genome.jp/dbget-bin/www_bget?ko:K12599	path:ko03018
c27399_g1_i1	K13539	LMLN	http://www.genome.jp/dbget-bin/www_bget?ko:K13539
c27882_g1_i1	K10524	NRK1_2	http://www.genome.jp/dbget-bin/www_bget?ko:K10524	path:ko00760;path:ko01100
c27376_g1_i1	K14823	EBP2, EBNA1BP2	http://www.genome.jp/dbget-bin/www_bget?ko:K14823
c27501_g1_i1	K05702	AF6, MLLT4	http://www.genome.jp/dbget-bin/www_bget?ko:K05702	path:ko04014;path:ko04015;path:ko04024;path:ko04520;path:ko04530;path:ko04670
c27935_g1_i1	K10402	KIF20	http://www.genome.jp/dbget-bin/www_bget?ko:K10402
c27828_g1_i1	K10258	TER, TSC13, CER10	http://www.genome.jp/dbget-bin/www_bget?ko:K10258	path:ko00062;path:ko01040;path:ko01100;path:ko01110;path:ko01212
c27382_g1_i1	K00528	E1.18.1.2, fpr	http://www.genome.jp/dbget-bin/www_bget?ko:K00528
c27706_g1_i1	K08900	BCS1	http://www.genome.jp/dbget-bin/www_bget?ko:K08900
c27925_g3_i1	K10268	FBXL2_20	http://www.genome.jp/dbget-bin/www_bget?ko:K10268
c27691_g1_i1	K10494	ZBTB7	http://www.genome.jp/dbget-bin/www_bget?ko:K10494
c27104_g1_i1	K14569	BMS1	http://www.genome.jp/dbget-bin/www_bget?ko:K14569	path:ko03008
c27104_g1_i2	K14569	BMS1	http://www.genome.jp/dbget-bin/www_bget?ko:K14569	path:ko03008
c27584_g1_i1	K09228	KRAB	http://www.genome.jp/dbget-bin/www_bget?ko:K09228
c28002_g1_i1	K15712	TTC3	http://www.genome.jp/dbget-bin/www_bget?ko:K15712
c27198_g1_i1	K01587	PAICS	http://www.genome.jp/dbget-bin/www_bget?ko:K01587	path:ko00230;path:ko01100
c27693_g1_i1	K17822	DCUN1D1_2	http://www.genome.jp/dbget-bin/www_bget?ko:K17822
c27821_g1_i1	K11366	USP22_27_51, UBP8	http://www.genome.jp/dbget-bin/www_bget?ko:K11366
c28061_g1_i1	K11778	DHDDS, RER2, SRT1	http://www.genome.jp/dbget-bin/www_bget?ko:K11778	path:ko00900;path:ko01110
c27237_g1_i1	K17768	TOM70	http://www.genome.jp/dbget-bin/www_bget?ko:K17768
c27384_g1_i1	K09497	CCT5	http://www.genome.jp/dbget-bin/www_bget?ko:K09497
c27708_g1_i1	K10779	ATRX	http://www.genome.jp/dbget-bin/www_bget?ko:K10779
c27251_g1_i1	K13176	THOC7	http://www.genome.jp/dbget-bin/www_bget?ko:K13176	path:ko03013
c27970_g1_i1	K01176	E3.2.1.1, amyA, malS	http://www.genome.jp/dbget-bin/www_bget?ko:K01176	path:ko00500;path:ko01100;path:ko04973
c27797_g1_i1	K13856	SLC4A3, AE3	http://www.genome.jp/dbget-bin/www_bget?ko:K13856
c27658_g1_i1	K10140	DDB2	http://www.genome.jp/dbget-bin/www_bget?ko:K10140	path:ko03420;path:ko04115;path:ko04120;path:ko05161
c27752_g1_i1	K16803	CKAP5, XMAP215	http://www.genome.jp/dbget-bin/www_bget?ko:K16803
c27752_g1_i2	K16803	CKAP5, XMAP215	http://www.genome.jp/dbget-bin/www_bget?ko:K16803
c27418_g1_i1	K06269	PPP1C	http://www.genome.jp/dbget-bin/www_bget?ko:K06269	path:ko03015;path:ko04022;path:ko04024;path:ko04113;path:ko04114;path:ko04261;path:ko04270;path:ko04390;path:ko04510;path:ko04611;path:ko04720;path:ko04728;path:ko04750;path:ko04810;path:ko04910;path:ko04921;path:ko05031;path:ko05034;path:ko05168;path:ko05205
c27415_g1_i1	K15693	RNF26	http://www.genome.jp/dbget-bin/www_bget?ko:K15693
c27559_g1_i1	K14590	FTSJD1, AFT	http://www.genome.jp/dbget-bin/www_bget?ko:K14590
c28003_g1_i1	K09606	C9ORF3	http://www.genome.jp/dbget-bin/www_bget?ko:K09606
c28003_g1_i2	K09606	C9ORF3	http://www.genome.jp/dbget-bin/www_bget?ko:K09606
c27542_g1_i1	K17497	PMM	http://www.genome.jp/dbget-bin/www_bget?ko:K17497	path:ko00051;path:ko00520;path:ko01100;path:ko01110
c27723_g1_i1	K13708	DOCK1	http://www.genome.jp/dbget-bin/www_bget?ko:K13708	path:ko04510;path:ko04810;path:ko05100;path:ko05131
c27723_g1_i2	K13708	DOCK1	http://www.genome.jp/dbget-bin/www_bget?ko:K13708	path:ko04510;path:ko04810;path:ko05100;path:ko05131
c27723_g1_i3	K13708	DOCK1	http://www.genome.jp/dbget-bin/www_bget?ko:K13708	path:ko04510;path:ko04810;path:ko05100;path:ko05131
c27525_g1_i1	K05305	FUK	http://www.genome.jp/dbget-bin/www_bget?ko:K05305	path:ko00051;path:ko00520;path:ko01100
c27525_g1_i2	K05305	FUK	http://www.genome.jp/dbget-bin/www_bget?ko:K05305	path:ko00051;path:ko00520;path:ko01100
c27525_g1_i3	K05305	FUK	http://www.genome.jp/dbget-bin/www_bget?ko:K05305	path:ko00051;path:ko00520;path:ko01100
c27525_g1_i5	K05305	FUK	http://www.genome.jp/dbget-bin/www_bget?ko:K05305	path:ko00051;path:ko00520;path:ko01100
c27823_g1_i1	K06185	ABCF2	http://www.genome.jp/dbget-bin/www_bget?ko:K06185
c27778_g1_i1	K09228	KRAB	http://www.genome.jp/dbget-bin/www_bget?ko:K09228
c27166_g1_i1	K11366	USP22_27_51, UBP8	http://www.genome.jp/dbget-bin/www_bget?ko:K11366
c27166_g1_i3	K11366	USP22_27_51, UBP8	http://www.genome.jp/dbget-bin/www_bget?ko:K11366
c27736_g1_i1	K10532	HGSNAT	http://www.genome.jp/dbget-bin/www_bget?ko:K10532	path:ko00531;path:ko01100;path:ko04142
c27736_g1_i2	K10532	HGSNAT	http://www.genome.jp/dbget-bin/www_bget?ko:K10532	path:ko00531;path:ko01100;path:ko04142
c27996_g1_i1	K09257	NFKBIL2	http://www.genome.jp/dbget-bin/www_bget?ko:K09257
c27487_g1_i1	K16495	PCDHGA	http://www.genome.jp/dbget-bin/www_bget?ko:K16495
c27487_g1_i2	K16495	PCDHGA	http://www.genome.jp/dbget-bin/www_bget?ko:K16495
c27487_g2_i1	K16669	FAT4	http://www.genome.jp/dbget-bin/www_bget?ko:K16669	path:ko04391
c27937_g1_i1	K15084	SLC25A16, GDA, LEU5	http://www.genome.jp/dbget-bin/www_bget?ko:K15084
c27565_g1_i1	K07374	TUBA	http://www.genome.jp/dbget-bin/www_bget?ko:K07374	path:ko04145;path:ko04540;path:ko05130
c27622_g1_i1	K08622	ADAMTS7	http://www.genome.jp/dbget-bin/www_bget?ko:K08622
c27615_g1_i1	K06226	SMO	http://www.genome.jp/dbget-bin/www_bget?ko:K06226	path:ko04340;path:ko05200;path:ko05205;path:ko05217
c27615_g1_i2	K06226	SMO	http://www.genome.jp/dbget-bin/www_bget?ko:K06226	path:ko04340;path:ko05200;path:ko05205;path:ko05217
c28052_g1_i1	K03352	APC5	http://www.genome.jp/dbget-bin/www_bget?ko:K03352	path:ko04110;path:ko04111;path:ko04113;path:ko04114;path:ko04120;path:ko04914;path:ko05166
c28052_g1_i2	K03352	APC5	http://www.genome.jp/dbget-bin/www_bget?ko:K03352	path:ko04110;path:ko04111;path:ko04113;path:ko04114;path:ko04120;path:ko04914;path:ko05166
c27476_g1_i1	K09565	PPIF	http://www.genome.jp/dbget-bin/www_bget?ko:K09565	path:ko04020;path:ko04022;path:ko05012;path:ko05016;path:ko05145
c27275_g1_i1	K07739	ELP3, KAT9	http://www.genome.jp/dbget-bin/www_bget?ko:K07739
c27872_g1_i1	K10268	FBXL2_20	http://www.genome.jp/dbget-bin/www_bget?ko:K10268
c27406_g1_i1	K14801	TSR4	http://www.genome.jp/dbget-bin/www_bget?ko:K14801
c27551_g1_i1	K07253	MIF	http://www.genome.jp/dbget-bin/www_bget?ko:K07253	path:ko00350;path:ko00360
c27551_g1_i2	K07253	MIF	http://www.genome.jp/dbget-bin/www_bget?ko:K07253	path:ko00350;path:ko00360
c27551_g1_i3	K07253	MIF	http://www.genome.jp/dbget-bin/www_bget?ko:K07253	path:ko00350;path:ko00360
c27616_g1_i1	K09680	coaW	http://www.genome.jp/dbget-bin/www_bget?ko:K09680	path:ko00770;path:ko01100
c27930_g1_i1	K16733	RACGAP1, Tum	http://www.genome.jp/dbget-bin/www_bget?ko:K16733
c27930_g1_i2	K16733	RACGAP1, Tum	http://www.genome.jp/dbget-bin/www_bget?ko:K16733
c27991_g1_i1	K14464	FUT-1, FucTC	http://www.genome.jp/dbget-bin/www_bget?ko:K14464	path:ko00513
c27991_g1_i2	K14464	FUT-1, FucTC	http://www.genome.jp/dbget-bin/www_bget?ko:K14464	path:ko00513
c27946_g1_i1	K02257	COX10	http://www.genome.jp/dbget-bin/www_bget?ko:K02257	path:ko00190;path:ko00860;path:ko01100;path:ko01110
c27946_g1_i2	K02257	COX10	http://www.genome.jp/dbget-bin/www_bget?ko:K02257	path:ko00190;path:ko00860;path:ko01100;path:ko01110
c27946_g1_i3	K02257	COX10	http://www.genome.jp/dbget-bin/www_bget?ko:K02257	path:ko00190;path:ko00860;path:ko01100;path:ko01110
c27943_g1_i1	K08076	E3.4.24.21	http://www.genome.jp/dbget-bin/www_bget?ko:K08076
c27943_g1_i2	K08076	E3.4.24.21	http://www.genome.jp/dbget-bin/www_bget?ko:K08076
c27997_g1_i1	K10260	FBXW7, SEL10	http://www.genome.jp/dbget-bin/www_bget?ko:K10260	path:ko04120
c27997_g1_i2	K10260	FBXW7, SEL10	http://www.genome.jp/dbget-bin/www_bget?ko:K10260	path:ko04120
c27185_g1_i1	K12897	TRA2	http://www.genome.jp/dbget-bin/www_bget?ko:K12897	path:ko03040
c27185_g1_i2	K12897	TRA2	http://www.genome.jp/dbget-bin/www_bget?ko:K12897	path:ko03040
c27185_g1_i3	K12897	TRA2	http://www.genome.jp/dbget-bin/www_bget?ko:K12897	path:ko03040
c27185_g1_i4	K12897	TRA2	http://www.genome.jp/dbget-bin/www_bget?ko:K12897	path:ko03040
c27185_g1_i5	K12897	TRA2	http://www.genome.jp/dbget-bin/www_bget?ko:K12897	path:ko03040
c27185_g1_i6	K12897	TRA2	http://www.genome.jp/dbget-bin/www_bget?ko:K12897	path:ko03040
c27236_g1_i1	K09510	DNAJB4	http://www.genome.jp/dbget-bin/www_bget?ko:K09510
c27236_g1_i2	K09510	DNAJB4	http://www.genome.jp/dbget-bin/www_bget?ko:K09510
c27440_g1_i1	K06105	TJP4, PILT	http://www.genome.jp/dbget-bin/www_bget?ko:K06105	path:ko04530
c27440_g1_i2	K06105	TJP4, PILT	http://www.genome.jp/dbget-bin/www_bget?ko:K06105	path:ko04530
c27440_g1_i3	K06105	TJP4, PILT	http://www.genome.jp/dbget-bin/www_bget?ko:K06105	path:ko04530
c27968_g1_i1	K03105	SRP19	http://www.genome.jp/dbget-bin/www_bget?ko:K03105	path:ko03060
c27296_g1_i1	K11426	SMYD	http://www.genome.jp/dbget-bin/www_bget?ko:K11426
c27296_g1_i2	K11426	SMYD	http://www.genome.jp/dbget-bin/www_bget?ko:K11426
c27851_g1_i1	K02355	fusA, GFM, EFG	http://www.genome.jp/dbget-bin/www_bget?ko:K02355
c28058_g1_i1	K11578	ZW10	http://www.genome.jp/dbget-bin/www_bget?ko:K11578
c27879_g1_i1	K01869	LARS, leuS	http://www.genome.jp/dbget-bin/www_bget?ko:K01869	path:ko00970
c27857_g1_i1	K07424	CYP3A	http://www.genome.jp/dbget-bin/www_bget?ko:K07424	path:ko00140;path:ko00591;path:ko00830;path:ko01100;path:ko05204
c27857_g1_i2	K01832	TBXAS1, CYP5A	http://www.genome.jp/dbget-bin/www_bget?ko:K01832	path:ko00590;path:ko01100;path:ko04611
c27727_g1_i1	K09115	MNT, ROX	http://www.genome.jp/dbget-bin/www_bget?ko:K09115
c27727_g1_i2	K09115	MNT, ROX	http://www.genome.jp/dbget-bin/www_bget?ko:K09115
c27432_g1_i1	K14312	NUP155	http://www.genome.jp/dbget-bin/www_bget?ko:K14312	path:ko03013
c27409_g1_i1	K06677	YCS4, CNAP1, CAPD2	http://www.genome.jp/dbget-bin/www_bget?ko:K06677	path:ko04111
c27409_g1_i2	K06677	YCS4, CNAP1, CAPD2	http://www.genome.jp/dbget-bin/www_bget?ko:K06677	path:ko04111
c27268_g1_i1	K15046	NS1BP	http://www.genome.jp/dbget-bin/www_bget?ko:K15046	path:ko05164
c27268_g1_i2	K15046	NS1BP	http://www.genome.jp/dbget-bin/www_bget?ko:K15046	path:ko05164
c27268_g1_i3	K15046	NS1BP	http://www.genome.jp/dbget-bin/www_bget?ko:K15046	path:ko05164
c27268_g1_i4	K15046	NS1BP	http://www.genome.jp/dbget-bin/www_bget?ko:K15046	path:ko05164
c27268_g1_i5	K15046	NS1BP	http://www.genome.jp/dbget-bin/www_bget?ko:K15046	path:ko05164
c27761_g1_i1	K00857	tdk, TK	http://www.genome.jp/dbget-bin/www_bget?ko:K00857	path:ko00240;path:ko00983;path:ko01100
c27170_g1_i1	K01265	E3.4.11.18, map	http://www.genome.jp/dbget-bin/www_bget?ko:K01265
c27862_g1_i1	K15157	MED15	http://www.genome.jp/dbget-bin/www_bget?ko:K15157
c27400_g1_i1	K08824	CDKL	http://www.genome.jp/dbget-bin/www_bget?ko:K08824
c27400_g1_i2	K08824	CDKL	http://www.genome.jp/dbget-bin/www_bget?ko:K08824
c27400_g1_i3	K08824	CDKL	http://www.genome.jp/dbget-bin/www_bget?ko:K08824
c27621_g1_i1	K01724	E4.2.1.96, PCBD, phhB	http://www.genome.jp/dbget-bin/www_bget?ko:K01724
c27621_g1_i2	K15176	CTR9	http://www.genome.jp/dbget-bin/www_bget?ko:K15176
c27621_g1_i3	K01724	E4.2.1.96, PCBD, phhB	http://www.genome.jp/dbget-bin/www_bget?ko:K01724
c27621_g1_i4	K01724	E4.2.1.96, PCBD, phhB	http://www.genome.jp/dbget-bin/www_bget?ko:K01724
c27931_g1_i1	K10746	EXO1	http://www.genome.jp/dbget-bin/www_bget?ko:K10746	path:ko03430
c27986_g1_i1	K14972	PAXIP1, PTIP	http://www.genome.jp/dbget-bin/www_bget?ko:K14972
c27986_g1_i2	K14972	PAXIP1, PTIP	http://www.genome.jp/dbget-bin/www_bget?ko:K14972
c27070_g2_i1	K17633	RASAL2	http://www.genome.jp/dbget-bin/www_bget?ko:K17633	path:ko04014
c27070_g3_i1	K10635	RNF111	http://www.genome.jp/dbget-bin/www_bget?ko:K10635
c27070_g2_i2	K17633	RASAL2	http://www.genome.jp/dbget-bin/www_bget?ko:K17633	path:ko04014
c27301_g1_i1	K13191	RBM16, SCAF8	http://www.genome.jp/dbget-bin/www_bget?ko:K13191
c27301_g1_i2	K13191	RBM16, SCAF8	http://www.genome.jp/dbget-bin/www_bget?ko:K13191
c27434_g1_i1	K09228	KRAB	http://www.genome.jp/dbget-bin/www_bget?ko:K09228
c27434_g1_i2	K09228	KRAB	http://www.genome.jp/dbget-bin/www_bget?ko:K09228
c27434_g1_i3	K09228	KRAB	http://www.genome.jp/dbget-bin/www_bget?ko:K09228
c27434_g1_i4	K09228	KRAB	http://www.genome.jp/dbget-bin/www_bget?ko:K09228
c27168_g1_i1	K04520	APP	http://www.genome.jp/dbget-bin/www_bget?ko:K04520	path:ko04726;path:ko05010
c27494_g1_i1	K03434	PIGL	http://www.genome.jp/dbget-bin/www_bget?ko:K03434	path:ko00563;path:ko01100
c28078_g1_i1	K10588	UBE3B	http://www.genome.jp/dbget-bin/www_bget?ko:K10588	path:ko04120
c27650_g1_i1	K02607	ORC5	http://www.genome.jp/dbget-bin/www_bget?ko:K02607	path:ko04110;path:ko04111;path:ko04113
c27650_g1_i2	K02607	ORC5	http://www.genome.jp/dbget-bin/www_bget?ko:K02607	path:ko04110;path:ko04111;path:ko04113
c27779_g1_i1	K11996	MOCS3, UBA4, moeB	http://www.genome.jp/dbget-bin/www_bget?ko:K11996	path:ko04122
c27729_g1_i1	K00943	E2.7.4.9, tmk	http://www.genome.jp/dbget-bin/www_bget?ko:K00943	path:ko00240;path:ko01100
c27729_g1_i2	K00943	E2.7.4.9, tmk	http://www.genome.jp/dbget-bin/www_bget?ko:K00943	path:ko00240;path:ko01100
c27729_g1_i3	K00943	E2.7.4.9, tmk	http://www.genome.jp/dbget-bin/www_bget?ko:K00943	path:ko00240;path:ko01100
c27729_g1_i4	K00943	E2.7.4.9, tmk	http://www.genome.jp/dbget-bin/www_bget?ko:K00943	path:ko00240;path:ko01100
c27886_g1_i1	K00699	UGT	http://www.genome.jp/dbget-bin/www_bget?ko:K00699	path:ko00040;path:ko00053;path:ko00140;path:ko00500;path:ko00830;path:ko00860;path:ko00980;path:ko00982;path:ko00983;path:ko01100;path:ko05204
c27886_g1_i2	K00699	UGT	http://www.genome.jp/dbget-bin/www_bget?ko:K00699	path:ko00040;path:ko00053;path:ko00140;path:ko00500;path:ko00830;path:ko00860;path:ko00980;path:ko00982;path:ko00983;path:ko01100;path:ko05204
c27886_g1_i3	K00699	UGT	http://www.genome.jp/dbget-bin/www_bget?ko:K00699	path:ko00040;path:ko00053;path:ko00140;path:ko00500;path:ko00830;path:ko00860;path:ko00980;path:ko00982;path:ko00983;path:ko01100;path:ko05204
c27926_g1_i1	K06275	PARV	http://www.genome.jp/dbget-bin/www_bget?ko:K06275	path:ko04510
c27558_g1_i1	K06626	CCNE	http://www.genome.jp/dbget-bin/www_bget?ko:K06626	path:ko04110;path:ko04114;path:ko04115;path:ko04151;path:ko04391;path:ko05161;path:ko05162;path:ko05200;path:ko05203;path:ko05206;path:ko05215;path:ko05222
c27558_g1_i2	K06626	CCNE	http://www.genome.jp/dbget-bin/www_bget?ko:K06626	path:ko04110;path:ko04114;path:ko04115;path:ko04151;path:ko04391;path:ko05161;path:ko05162;path:ko05200;path:ko05203;path:ko05206;path:ko05215;path:ko05222
c28045_g1_i1	K01205	NAGLU	http://www.genome.jp/dbget-bin/www_bget?ko:K01205	path:ko00531;path:ko01100;path:ko04142
c27829_g1_i1	K05700	VCL	http://www.genome.jp/dbget-bin/www_bget?ko:K05700	path:ko04510;path:ko04520;path:ko04670;path:ko04810;path:ko05100;path:ko05131;path:ko05146
c27688_g1_i1	K11319	ING3	http://www.genome.jp/dbget-bin/www_bget?ko:K11319
c27597_g1_i1	K01915	glnA	http://www.genome.jp/dbget-bin/www_bget?ko:K01915	path:ko00250;path:ko00330;path:ko00630;path:ko00910;path:ko01100;path:ko01120;path:ko01230;path:ko02020;path:ko04724;path:ko04727
c27235_g1_i1	K07561	dph2, DPH1	http://www.genome.jp/dbget-bin/www_bget?ko:K07561
c27978_g1_i1	K12619	XRN2, RAT1	http://www.genome.jp/dbget-bin/www_bget?ko:K12619	path:ko03008;path:ko03018
c27978_g1_i2	K12619	XRN2, RAT1	http://www.genome.jp/dbget-bin/www_bget?ko:K12619	path:ko03008;path:ko03018
c28101_g1_i1	K06515	SLC44A1, CDW92	http://www.genome.jp/dbget-bin/www_bget?ko:K06515
c28096_g1_i1	K13710	ARHGEF7, PIXB	http://www.genome.jp/dbget-bin/www_bget?ko:K13710	path:ko04810
c27158_g1_i1	K13348	MPV17	http://www.genome.jp/dbget-bin/www_bget?ko:K13348	path:ko04146
c27421_g1_i1	K15341	DCLRE1B, SNM1B	http://www.genome.jp/dbget-bin/www_bget?ko:K15341
c27940_g1_i1	K10756	RFC3_5	http://www.genome.jp/dbget-bin/www_bget?ko:K10756	path:ko03030;path:ko03420;path:ko03430
c27159_g1_i1	K01875	SARS, serS	http://www.genome.jp/dbget-bin/www_bget?ko:K01875	path:ko00970
c27306_g1_i1	K02427	rlmE, rrmJ, ftsJ	http://www.genome.jp/dbget-bin/www_bget?ko:K02427
c27788_g1_i1	K10661	MARCH6, DOA10	http://www.genome.jp/dbget-bin/www_bget?ko:K10661	path:ko04141
c28050_g1_i1	K00312	WNT3	http://www.genome.jp/dbget-bin/www_bget?ko:K00312	path:ko04310;path:ko04340;path:ko04390;path:ko04916;path:ko05166;path:ko05200;path:ko05205;path:ko05206;path:ko05217
c28050_g1_i2	K00312	WNT3	http://www.genome.jp/dbget-bin/www_bget?ko:K00312	path:ko04310;path:ko04340;path:ko04390;path:ko04916;path:ko05166;path:ko05200;path:ko05205;path:ko05206;path:ko05217
c27448_g1_i1	K00852	rbsK, RBKS	http://www.genome.jp/dbget-bin/www_bget?ko:K00852	path:ko00030
c27448_g1_i2	K00852	rbsK, RBKS	http://www.genome.jp/dbget-bin/www_bget?ko:K00852	path:ko00030
c27964_g1_i1	K09189	MLL5	http://www.genome.jp/dbget-bin/www_bget?ko:K09189	path:ko00310
c27863_g1_i1	K01672	E4.2.1.1	http://www.genome.jp/dbget-bin/www_bget?ko:K01672	path:ko00910
c27496_g1_i1	K02370	EXTL3	http://www.genome.jp/dbget-bin/www_bget?ko:K02370	path:ko00534;path:ko01100
c27790_g1_i1	K14025	SELS, VIMP	http://www.genome.jp/dbget-bin/www_bget?ko:K14025	path:ko04141
c27790_g1_i2	K14025	SELS, VIMP	http://www.genome.jp/dbget-bin/www_bget?ko:K14025	path:ko04141
c27254_g1_i1	K04382	PPP2C	http://www.genome.jp/dbget-bin/www_bget?ko:K04382	path:ko03015;path:ko04111;path:ko04113;path:ko04114;path:ko04151;path:ko04152;path:ko04261;path:ko04350;path:ko04390;path:ko04391;path:ko04530;path:ko04728;path:ko04730;path:ko05142;path:ko05160
c27327_g1_i1	K00128	E1.2.1.3	http://www.genome.jp/dbget-bin/www_bget?ko:K00128	path:ko00010;path:ko00040;path:ko00053;path:ko00071;path:ko00280;path:ko00310;path:ko00330;path:ko00340;path:ko00380;path:ko00410;path:ko00561;path:ko00620;path:ko00625;path:ko00903;path:ko01100;path:ko01110;path:ko01120
c27327_g1_i2	K00128	E1.2.1.3	http://www.genome.jp/dbget-bin/www_bget?ko:K00128	path:ko00010;path:ko00040;path:ko00053;path:ko00071;path:ko00280;path:ko00310;path:ko00330;path:ko00340;path:ko00380;path:ko00410;path:ko00561;path:ko00620;path:ko00625;path:ko00903;path:ko01100;path:ko01110;path:ko01120
c27327_g1_i3	K00128	E1.2.1.3	http://www.genome.jp/dbget-bin/www_bget?ko:K00128	path:ko00010;path:ko00040;path:ko00053;path:ko00071;path:ko00280;path:ko00310;path:ko00330;path:ko00340;path:ko00380;path:ko00410;path:ko00561;path:ko00620;path:ko00625;path:ko00903;path:ko01100;path:ko01110;path:ko01120
c27516_g1_i1	K05125	DDR2, TKT	http://www.genome.jp/dbget-bin/www_bget?ko:K05125
c27516_g1_i2	K05125	DDR2, TKT	http://www.genome.jp/dbget-bin/www_bget?ko:K05125
c27335_g1_i1	K14803	PTC2_3	http://www.genome.jp/dbget-bin/www_bget?ko:K14803
c28073_g1_i1	K12626	LSM7	http://www.genome.jp/dbget-bin/www_bget?ko:K12626	path:ko03018;path:ko03040
c28100_g1_i1	K15259	PARP7S	http://www.genome.jp/dbget-bin/www_bget?ko:K15259
c27883_g1_i1	K12737	SDCCAG10	http://www.genome.jp/dbget-bin/www_bget?ko:K12737
c27253_g1_i1	K17429	MRPL48	http://www.genome.jp/dbget-bin/www_bget?ko:K17429
c27464_g1_i1	K13597	ACVR2N	http://www.genome.jp/dbget-bin/www_bget?ko:K13597
c27157_g1_i1	K04560	STX1A	http://www.genome.jp/dbget-bin/www_bget?ko:K04560	path:ko04130;path:ko04721;path:ko04911;path:ko05031
c27958_g1_i1	K12393	AP1M	http://www.genome.jp/dbget-bin/www_bget?ko:K12393	path:ko04142
c27590_g1_i1	K07515	HADHA	http://www.genome.jp/dbget-bin/www_bget?ko:K07515	path:ko00062;path:ko00071;path:ko00280;path:ko00310;path:ko00362;path:ko00380;path:ko00410;path:ko00627;path:ko00640;path:ko00650;path:ko00930;path:ko01040;path:ko01100;path:ko01110;path:ko01120;path:ko01200;path:ko01212
c28035_g2_i1	K04911	KCNH8	http://www.genome.jp/dbget-bin/www_bget?ko:K04911
c27795_g1_i1	K16572	TUBGCP5, GCP5	http://www.genome.jp/dbget-bin/www_bget?ko:K16572
c27169_g1_i1	K11660	MTA	http://www.genome.jp/dbget-bin/www_bget?ko:K11660
c27169_g1_i2	K11660	MTA	http://www.genome.jp/dbget-bin/www_bget?ko:K11660
c27169_g1_i3	K11660	MTA	http://www.genome.jp/dbget-bin/www_bget?ko:K11660
c27169_g1_i4	K11660	MTA	http://www.genome.jp/dbget-bin/www_bget?ko:K11660
c27910_g1_i1	K09553	STIP1	http://www.genome.jp/dbget-bin/www_bget?ko:K09553	path:ko05020
c27328_g2_i1	K04392	RAC1	http://www.genome.jp/dbget-bin/www_bget?ko:K04392	path:ko04010;path:ko04014;path:ko04015;path:ko04024;path:ko04062;path:ko04145;path:ko04151;path:ko04310;path:ko04360;path:ko04370;path:ko04380;path:ko04510;path:ko04520;path:ko04620;path:ko04650;path:ko04662;path:ko04664;path:ko04666;path:ko04670;path:ko04722;path:ko04810;path:ko04932;path:ko04972;path:ko05014;path:ko05100;path:ko05120;path:ko05131;path:ko05132;path:ko05200;path:ko05203;path:ko05…
c27328_g2_i2	K04392	RAC1	http://www.genome.jp/dbget-bin/www_bget?ko:K04392	path:ko04010;path:ko04014;path:ko04015;path:ko04024;path:ko04062;path:ko04145;path:ko04151;path:ko04310;path:ko04360;path:ko04370;path:ko04380;path:ko04510;path:ko04520;path:ko04620;path:ko04650;path:ko04662;path:ko04664;path:ko04666;path:ko04670;path:ko04722;path:ko04810;path:ko04932;path:ko04972;path:ko05014;path:ko05100;path:ko05120;path:ko05131;path:ko05132;path:ko05200;path:ko05203;path:ko05…
c27941_g1_i1	K09228	KRAB	http://www.genome.jp/dbget-bin/www_bget?ko:K09228
c27387_g1_i1	K03627	MBF1	http://www.genome.jp/dbget-bin/www_bget?ko:K03627
c27387_g1_i3	K03627	MBF1	http://www.genome.jp/dbget-bin/www_bget?ko:K03627
c27917_g1_i1	K13126	PABPC	http://www.genome.jp/dbget-bin/www_bget?ko:K13126	path:ko03013;path:ko03015;path:ko03018
c27454_g1_i1	K01772	hemH, FECH	http://www.genome.jp/dbget-bin/www_bget?ko:K01772	path:ko00860;path:ko01100;path:ko01110
c27676_g1_i1	K00029	E1.1.1.40, maeB	http://www.genome.jp/dbget-bin/www_bget?ko:K00029	path:ko00620;path:ko00710;path:ko01100;path:ko01120;path:ko01200
c27611_g1_i1	K09228	KRAB	http://www.genome.jp/dbget-bin/www_bget?ko:K09228
c27836_g1_i2	K01784	galE, GALE	http://www.genome.jp/dbget-bin/www_bget?ko:K01784	path:ko00052;path:ko00520;path:ko01100;path:ko01110
c27836_g1_i3	K01784	galE, GALE	http://www.genome.jp/dbget-bin/www_bget?ko:K01784	path:ko00052;path:ko00520;path:ko01100;path:ko01110
c27242_g1_i1	K10104	FCN	http://www.genome.jp/dbget-bin/www_bget?ko:K10104
c27315_g1_i1	K14408	CSTF3, RNA14	http://www.genome.jp/dbget-bin/www_bget?ko:K14408	path:ko03015
c27315_g1_i2	K14408	CSTF3, RNA14	http://www.genome.jp/dbget-bin/www_bget?ko:K14408	path:ko03015
c27175_g1_i1	K03685	rnc, DROSHA, RNT1	http://www.genome.jp/dbget-bin/www_bget?ko:K03685	path:ko03008;path:ko05205
c27175_g1_i2	K03685	rnc, DROSHA, RNT1	http://www.genome.jp/dbget-bin/www_bget?ko:K03685	path:ko03008;path:ko05205
c27973_g1_i1	K07521	UNC5	http://www.genome.jp/dbget-bin/www_bget?ko:K07521	path:ko04360
c27598_g1_i1	K03841	FBP, fbp	http://www.genome.jp/dbget-bin/www_bget?ko:K03841	path:ko00010;path:ko00030;path:ko00051;path:ko00680;path:ko00710;path:ko01100;path:ko01110;path:ko01120;path:ko01200;path:ko04152;path:ko04910
c28027_g1_i1	K06835	ADAM12	http://www.genome.jp/dbget-bin/www_bget?ko:K06835
c27199_g1_i1	K08291	GRK4_5_6	http://www.genome.jp/dbget-bin/www_bget?ko:K08291	path:ko04062;path:ko04144;path:ko05032
c27199_g1_i2	K08291	GRK4_5_6	http://www.genome.jp/dbget-bin/www_bget?ko:K08291	path:ko04062;path:ko04144;path:ko05032
c27684_g1_i1	K12478	EEA1	http://www.genome.jp/dbget-bin/www_bget?ko:K12478	path:ko04144;path:ko04145;path:ko05152
c27898_g1_i1	K14715	SLC39A9, ZIP9	http://www.genome.jp/dbget-bin/www_bget?ko:K14715
c27509_g1_i1	K00710	GALNT	http://www.genome.jp/dbget-bin/www_bget?ko:K00710	path:ko00512;path:ko01100
c27690_g1_i1	K16465	CETN1	http://www.genome.jp/dbget-bin/www_bget?ko:K16465
c27490_g1_i1	K14840	NOP53, GLTSCR2	http://www.genome.jp/dbget-bin/www_bget?ko:K14840	path:ko05168
c28084_g1_i1	K16748	BBS5	http://www.genome.jp/dbget-bin/www_bget?ko:K16748
c28084_g1_i2	K16748	BBS5	http://www.genome.jp/dbget-bin/www_bget?ko:K16748
c27197_g1_i1	K13092	ZC3H18	http://www.genome.jp/dbget-bin/www_bget?ko:K13092
c27197_g1_i2	K13092	ZC3H18	http://www.genome.jp/dbget-bin/www_bget?ko:K13092
c27147_g1_i1	K10609	CUL4	http://www.genome.jp/dbget-bin/www_bget?ko:K10609	path:ko03420;path:ko04120
c27147_g1_i2	K10609	CUL4	http://www.genome.jp/dbget-bin/www_bget?ko:K10609	path:ko03420;path:ko04120
c27536_g1_i1	K15193	SPTY2D1, SPT2	http://www.genome.jp/dbget-bin/www_bget?ko:K15193
c27854_g1_i1	K08776	NPEPPS	http://www.genome.jp/dbget-bin/www_bget?ko:K08776
c27196_g1_i1	K11651	SMARCE1	http://www.genome.jp/dbget-bin/www_bget?ko:K11651
c27196_g1_i2	K11651	SMARCE1	http://www.genome.jp/dbget-bin/www_bget?ko:K11651
c27196_g1_i3	K11651	SMARCE1	http://www.genome.jp/dbget-bin/www_bget?ko:K11651
c27181_g1_i1	K03260	EIF4G	http://www.genome.jp/dbget-bin/www_bget?ko:K03260	path:ko03013;path:ko05416
c27181_g1_i2	K03260	EIF4G	http://www.genome.jp/dbget-bin/www_bget?ko:K03260	path:ko03013;path:ko05416
c27181_g1_i3	K03260	EIF4G	http://www.genome.jp/dbget-bin/www_bget?ko:K03260	path:ko03013;path:ko05416
c27181_g1_i4	K03260	EIF4G	http://www.genome.jp/dbget-bin/www_bget?ko:K03260	path:ko03013;path:ko05416
c27881_g1_i1	K03165	TOP3	http://www.genome.jp/dbget-bin/www_bget?ko:K03165	path:ko03440;path:ko03460
c27466_g1_i1	K13783	SLC37A1_2	http://www.genome.jp/dbget-bin/www_bget?ko:K13783
c27772_g1_i1	K16896	TPCN1	http://www.genome.jp/dbget-bin/www_bget?ko:K16896
c27772_g1_i2	K16896	TPCN1	http://www.genome.jp/dbget-bin/www_bget?ko:K16896
c27210_g1_i1	K14799	TSR1	http://www.genome.jp/dbget-bin/www_bget?ko:K14799
c27929_g1_i1	K00849	galK	http://www.genome.jp/dbget-bin/www_bget?ko:K00849	path:ko00052;path:ko00520;path:ko01100;path:ko01110
c27929_g1_i2	K00849	galK	http://www.genome.jp/dbget-bin/www_bget?ko:K00849	path:ko00052;path:ko00520;path:ko01100;path:ko01110
c27929_g1_i3	K00849	galK	http://www.genome.jp/dbget-bin/www_bget?ko:K00849	path:ko00052;path:ko00520;path:ko01100;path:ko01110
c27506_g1_i1	K00231	PPOX, hemY	http://www.genome.jp/dbget-bin/www_bget?ko:K00231	path:ko00860;path:ko01100;path:ko01110
c27576_g1_i1	K04570	BCL2L1, bcl-xL	http://www.genome.jp/dbget-bin/www_bget?ko:K04570	path:ko04014;path:ko04064;path:ko04151;path:ko04210;path:ko04630;path:ko05014;path:ko05145;path:ko05166;path:ko05200;path:ko05202;path:ko05212;path:ko05220;path:ko05222
c27576_g1_i2	K04570	BCL2L1, bcl-xL	http://www.genome.jp/dbget-bin/www_bget?ko:K04570	path:ko04014;path:ko04064;path:ko04151;path:ko04210;path:ko04630;path:ko05014;path:ko05145;path:ko05166;path:ko05200;path:ko05202;path:ko05212;path:ko05220;path:ko05222
c27576_g1_i3	K04570	BCL2L1, bcl-xL	http://www.genome.jp/dbget-bin/www_bget?ko:K04570	path:ko04014;path:ko04064;path:ko04151;path:ko04210;path:ko04630;path:ko05014;path:ko05145;path:ko05166;path:ko05200;path:ko05202;path:ko05212;path:ko05220;path:ko05222
c27629_g2_i1	K11585	CBX1, HP1B, SWI6	http://www.genome.jp/dbget-bin/www_bget?ko:K11585
c27260_g1_i1	K13119	FAM50, XAP5	http://www.genome.jp/dbget-bin/www_bget?ko:K13119
c27123_g1_i1	K12484	RAB11FIP1_2_5	http://www.genome.jp/dbget-bin/www_bget?ko:K12484	path:ko04144
c27123_g1_i2	K12484	RAB11FIP1_2_5	http://www.genome.jp/dbget-bin/www_bget?ko:K12484	path:ko04144
c27123_g1_i3	K12484	RAB11FIP1_2_5	http://www.genome.jp/dbget-bin/www_bget?ko:K12484	path:ko04144
c27504_g1_i1	K10837	PSTK	http://www.genome.jp/dbget-bin/www_bget?ko:K10837	path:ko00450;path:ko00970
c27165_g1_i1	K06630	YWHAE	http://www.genome.jp/dbget-bin/www_bget?ko:K06630	path:ko04110;path:ko04114;path:ko04151;path:ko04390;path:ko04391;path:ko04722;path:ko05169;path:ko05203
c27165_g1_i2	K06630	YWHAE	http://www.genome.jp/dbget-bin/www_bget?ko:K06630	path:ko04110;path:ko04114;path:ko04151;path:ko04390;path:ko04391;path:ko04722;path:ko05169;path:ko05203
c27404_g1_i1	K07376	PRKG	http://www.genome.jp/dbget-bin/www_bget?ko:K07376	path:ko04022;path:ko04540;path:ko04611;path:ko04713;path:ko04730;path:ko04740;path:ko04970
c28044_g1_i1	K03165	TOP3	http://www.genome.jp/dbget-bin/www_bget?ko:K03165	path:ko03440;path:ko03460
c27678_g1_i1	K06127	COQ5	http://www.genome.jp/dbget-bin/www_bget?ko:K06127	path:ko00130;path:ko01100;path:ko01110
c27485_g1_i1	K01697	E4.2.1.22, CBS	http://www.genome.jp/dbget-bin/www_bget?ko:K01697	path:ko00260;path:ko00270;path:ko01100;path:ko01230
c27485_g1_i2	K01697	E4.2.1.22, CBS	http://www.genome.jp/dbget-bin/www_bget?ko:K01697	path:ko00260;path:ko00270;path:ko01100;path:ko01230
c27813_g1_i1	K11592	DICER1, DCR1	http://www.genome.jp/dbget-bin/www_bget?ko:K11592	path:ko05206
c27311_g1_i1	K14838	NOP15	http://www.genome.jp/dbget-bin/www_bget?ko:K14838
c27187_g1_i1	K04708	E1.1.1.102	http://www.genome.jp/dbget-bin/www_bget?ko:K04708	path:ko00600;path:ko01100
c27830_g1_i1	K17307	FBLN1_2	http://www.genome.jp/dbget-bin/www_bget?ko:K17307
c27776_g1_i1	K08337	ATG7	http://www.genome.jp/dbget-bin/www_bget?ko:K08337	path:ko04140
c27776_g1_i2	K08337	ATG7	http://www.genome.jp/dbget-bin/www_bget?ko:K08337	path:ko04140
c27442_g1_i1	K05931	CARM1, PRMT4	http://www.genome.jp/dbget-bin/www_bget?ko:K05931
c27442_g1_i2	K05931	CARM1, PRMT4	http://www.genome.jp/dbget-bin/www_bget?ko:K05931
c27372_g1_i1	K08341	GABARAP, ATG8, LC3	http://www.genome.jp/dbget-bin/www_bget?ko:K08341	path:ko04068;path:ko04140;path:ko04727
c27798_g2_i1	K08798	MARK	http://www.genome.jp/dbget-bin/www_bget?ko:K08798
c27798_g2_i2	K08798	MARK	http://www.genome.jp/dbget-bin/www_bget?ko:K08798
c27798_g2_i3	K08798	MARK	http://www.genome.jp/dbget-bin/www_bget?ko:K08798
c27798_g2_i4	K08798	MARK	http://www.genome.jp/dbget-bin/www_bget?ko:K08798
c27798_g2_i5	K08798	MARK	http://www.genome.jp/dbget-bin/www_bget?ko:K08798
c27798_g2_i6	K08798	MARK	http://www.genome.jp/dbget-bin/www_bget?ko:K08798
c27798_g2_i7	K08798	MARK	http://www.genome.jp/dbget-bin/www_bget?ko:K08798
c27118_g1_i1	K13699	ABHD5, CGI-58	http://www.genome.jp/dbget-bin/www_bget?ko:K13699
c27324_g1_i1	K06100	SYMPK	http://www.genome.jp/dbget-bin/www_bget?ko:K06100	path:ko03015;path:ko04530
c28057_g1_i1	K14845	RAI1, DOM3Z	http://www.genome.jp/dbget-bin/www_bget?ko:K14845
c27811_g1_i1	K12373	HEXA_B	http://www.genome.jp/dbget-bin/www_bget?ko:K12373	path:ko00511;path:ko00520;path:ko00531;path:ko00603;path:ko00604;path:ko01100;path:ko01110;path:ko04142
c27343_g1_i1	K14724	SLC9A8, NHE8	http://www.genome.jp/dbget-bin/www_bget?ko:K14724
c27214_g1_i1	K15174	PAF1	http://www.genome.jp/dbget-bin/www_bget?ko:K15174
c27214_g1_i2	K15174	PAF1	http://www.genome.jp/dbget-bin/www_bget?ko:K15174
c27654_g1_i1	K08805	DCLK1_2	http://www.genome.jp/dbget-bin/www_bget?ko:K08805
c27654_g1_i2	K08805	DCLK1_2	http://www.genome.jp/dbget-bin/www_bget?ko:K08805
c27680_g1_i1	K04677	SMAD6_7	http://www.genome.jp/dbget-bin/www_bget?ko:K04677	path:ko04144;path:ko04350
c27818_g1_i1	K02332	POLG1	http://www.genome.jp/dbget-bin/www_bget?ko:K02332	path:ko01100
c27818_g1_i2	K02332	POLG1	http://www.genome.jp/dbget-bin/www_bget?ko:K02332	path:ko01100
c27150_g1_i1	K14437	CHD7	http://www.genome.jp/dbget-bin/www_bget?ko:K14437
c27696_g1_i1	K01511	ENTPD5_6	http://www.genome.jp/dbget-bin/www_bget?ko:K01511	path:ko00230;path:ko00240
c27350_g1_i1	K13711	PI4K2	http://www.genome.jp/dbget-bin/www_bget?ko:K13711	path:ko00562;path:ko01100;path:ko04070
c27350_g1_i2	K13711	PI4K2	http://www.genome.jp/dbget-bin/www_bget?ko:K13711	path:ko00562;path:ko01100;path:ko04070
c27271_g1_i1	K00558	DNMT1, dcm	http://www.genome.jp/dbget-bin/www_bget?ko:K00558	path:ko00270;path:ko01100;path:ko05206
c28000_g1_i1	K12479	VPS45	http://www.genome.jp/dbget-bin/www_bget?ko:K12479	path:ko04144
c27634_g1_i1	K14386	SLC5A6, SMVT	http://www.genome.jp/dbget-bin/www_bget?ko:K14386	path:ko04977
c27715_g1_i1	K04368	MAP2K1, MEK1	http://www.genome.jp/dbget-bin/www_bget?ko:K04368	path:ko04010;path:ko04012;path:ko04013;path:ko04014;path:ko04015;path:ko04022;path:ko04024;path:ko04062;path:ko04066;path:ko04068;path:ko04114;path:ko04151;path:ko04270;path:ko04320;path:ko04370;path:ko04380;path:ko04510;path:ko04540;path:ko04620;path:ko04626;path:ko04650;path:ko04660;path:ko04662;path:ko04664;path:ko04666;path:ko04668;path:ko04720;path:ko04722;path:ko04725;path:ko04726;path:ko04…
c27600_g1_i1	K10396	KIF5	http://www.genome.jp/dbget-bin/www_bget?ko:K10396	path:ko04728
c27780_g1_i1	K03010	RPB2, POLR2B	http://www.genome.jp/dbget-bin/www_bget?ko:K03010	path:ko00230;path:ko00240;path:ko01100;path:ko03020;path:ko05016;path:ko05169
c27759_g1_i1	K09228	KRAB	http://www.genome.jp/dbget-bin/www_bget?ko:K09228
c27759_g1_i2	K09228	KRAB	http://www.genome.jp/dbget-bin/www_bget?ko:K09228
c27759_g1_i3	K09228	KRAB	http://www.genome.jp/dbget-bin/www_bget?ko:K09228
c27759_g1_i4	K09228	KRAB	http://www.genome.jp/dbget-bin/www_bget?ko:K09228
c27859_g1_i1	K00121	frmA, ADH5, adhC	http://www.genome.jp/dbget-bin/www_bget?ko:K00121	path:ko00010;path:ko00071;path:ko00350;path:ko00625;path:ko00626;path:ko00680;path:ko00830;path:ko00980;path:ko00982;path:ko01100;path:ko01110;path:ko01120;path:ko01200;path:ko01220;path:ko05204
c27645_g1_i1	K08864	TLK	http://www.genome.jp/dbget-bin/www_bget?ko:K08864
c28111_g1_i1	K09250	CNBP	http://www.genome.jp/dbget-bin/www_bget?ko:K09250
c28111_g1_i2	K09250	CNBP	http://www.genome.jp/dbget-bin/www_bget?ko:K09250
c28111_g1_i3	K09250	CNBP	http://www.genome.jp/dbget-bin/www_bget?ko:K09250
c28111_g1_i4	K09250	CNBP	http://www.genome.jp/dbget-bin/www_bget?ko:K09250
c27877_g1_i1	K14570	REX1, REXO1, RNH70	http://www.genome.jp/dbget-bin/www_bget?ko:K14570	path:ko03008
c27659_g1_i1	K05730	VAV	http://www.genome.jp/dbget-bin/www_bget?ko:K05730	path:ko04024;path:ko04062;path:ko04510;path:ko04650;path:ko04660;path:ko04662;path:ko04664;path:ko04666;path:ko04670;path:ko04810
c27754_g1_i1	K12366	ELMO1, CED12	http://www.genome.jp/dbget-bin/www_bget?ko:K12366	path:ko04062;path:ko05100;path:ko05131
c27754_g1_i2	K12366	ELMO1, CED12	http://www.genome.jp/dbget-bin/www_bget?ko:K12366	path:ko04062;path:ko05100;path:ko05131
c27500_g1_i1	K15263	LYER	http://www.genome.jp/dbget-bin/www_bget?ko:K15263
c27824_g1_i1	K10686	UBE1C, UBA3	http://www.genome.jp/dbget-bin/www_bget?ko:K10686	path:ko04120
c27390_g1_i1	K17478	FKBP15, WAFL	http://www.genome.jp/dbget-bin/www_bget?ko:K17478
c27390_g1_i2	K17478	FKBP15, WAFL	http://www.genome.jp/dbget-bin/www_bget?ko:K17478
c27887_g1_i1	K11267	PDS5	http://www.genome.jp/dbget-bin/www_bget?ko:K11267
c27887_g1_i2	K11267	PDS5	http://www.genome.jp/dbget-bin/www_bget?ko:K11267
c27468_g1_i1	K00659	BAAT	http://www.genome.jp/dbget-bin/www_bget?ko:K00659	path:ko00120;path:ko00430;path:ko01040;path:ko01100;path:ko04146;path:ko04976
c27468_g1_i2	K00659	BAAT	http://www.genome.jp/dbget-bin/www_bget?ko:K00659	path:ko00120;path:ko00430;path:ko01040;path:ko01100;path:ko04146;path:ko04976
c28099_g1_i1	K16502	CDHR2, PCDH24, PCLKC	http://www.genome.jp/dbget-bin/www_bget?ko:K16502
c27481_g1_i1	K08504	BET1	http://www.genome.jp/dbget-bin/www_bget?ko:K08504	path:ko04130
c27765_g1_i1	K11426	SMYD	http://www.genome.jp/dbget-bin/www_bget?ko:K11426
c27816_g1_i1	K18083	MTMR6_7_8	http://www.genome.jp/dbget-bin/www_bget?ko:K18083
c27106_g1_i1	K12181	COPS8, CSN8	http://www.genome.jp/dbget-bin/www_bget?ko:K12181
c60799_g1_i1	K01132	GALNS	http://www.genome.jp/dbget-bin/www_bget?ko:K01132	path:ko00531;path:ko01100;path:ko04142
c60232_g1_i1	K08052	NF1	http://www.genome.jp/dbget-bin/www_bget?ko:K08052	path:ko04010;path:ko04014
c60530_g1_i1	K17927	SNX15	http://www.genome.jp/dbget-bin/www_bget?ko:K17927
c60905_g1_i1	K04533	HD	http://www.genome.jp/dbget-bin/www_bget?ko:K04533	path:ko05016
c60829_g1_i1	K17535	TNNI3K	http://www.genome.jp/dbget-bin/www_bget?ko:K17535
c61009_g1_i1	K08043	ADCY3	http://www.genome.jp/dbget-bin/www_bget?ko:K08043	path:ko00230;path:ko04015;path:ko04020;path:ko04022;path:ko04024;path:ko04062;path:ko04114;path:ko04261;path:ko04270;path:ko04540;path:ko04611;path:ko04713;path:ko04723;path:ko04724;path:ko04725;path:ko04727;path:ko04740;path:ko04750;path:ko04911;path:ko04912;path:ko04913;path:ko04914;path:ko04915;path:ko04916;path:ko04918;path:ko04921;path:ko04962;path:ko04970;path:ko04971;path:ko04972;path:ko04…
c60976_g1_i1	K13728	MAD2L2	http://www.genome.jp/dbget-bin/www_bget?ko:K13728	path:ko04110;path:ko04114;path:ko04914;path:ko05100;path:ko05131
c60138_g1_i1	K03026	RPC53, POLR3D	http://www.genome.jp/dbget-bin/www_bget?ko:K03026	path:ko00230;path:ko00240;path:ko01100;path:ko03020;path:ko04623;path:ko05169
c60425_g1_i1	K10896	FANCM	http://www.genome.jp/dbget-bin/www_bget?ko:K10896	path:ko03460
c60305_g1_i1	K14572	MDN1, REA1	http://www.genome.jp/dbget-bin/www_bget?ko:K14572	path:ko03008
c60202_g1_i1	K17854	CYP2K	http://www.genome.jp/dbget-bin/www_bget?ko:K17854
c60478_g1_i1	K09228	KRAB	http://www.genome.jp/dbget-bin/www_bget?ko:K09228
c60611_g1_i1	K09228	KRAB	http://www.genome.jp/dbget-bin/www_bget?ko:K09228
c60268_g1_i1	K00963	UGP2, galU, galF	http://www.genome.jp/dbget-bin/www_bget?ko:K00963	path:ko00040;path:ko00052;path:ko00500;path:ko00520;path:ko01100;path:ko01110
c60512_g1_i1	K00927	PGK, pgk	http://www.genome.jp/dbget-bin/www_bget?ko:K00927	path:ko00010;path:ko00710;path:ko01100;path:ko01110;path:ko01120;path:ko01200;path:ko01230
c60440_g1_i1	K16512	RPGRIP1	http://www.genome.jp/dbget-bin/www_bget?ko:K16512
c60875_g1_i1	K08052	NF1	http://www.genome.jp/dbget-bin/www_bget?ko:K08052	path:ko04010;path:ko04014
c60870_g1_i1	K17420	MRPL39	http://www.genome.jp/dbget-bin/www_bget?ko:K17420
c60360_g1_i1	K15503	ANKRD44	http://www.genome.jp/dbget-bin/www_bget?ko:K15503
c60548_g1_i1	K05322	KCNHN	http://www.genome.jp/dbget-bin/www_bget?ko:K05322
c60176_g1_i1	K07374	TUBA	http://www.genome.jp/dbget-bin/www_bget?ko:K07374	path:ko04145;path:ko04540;path:ko05130
c60378_g1_i1	K08739	MLH3	http://www.genome.jp/dbget-bin/www_bget?ko:K08739	path:ko03430
c60609_g1_i1	K17341	HMCN	http://www.genome.jp/dbget-bin/www_bget?ko:K17341
c60262_g1_i1	K08098	PIGZ, SMP3	http://www.genome.jp/dbget-bin/www_bget?ko:K08098	path:ko00563
c60174_g1_i1	K17435	MRPL54	http://www.genome.jp/dbget-bin/www_bget?ko:K17435
c60603_g1_i1	K05051	TAAR	http://www.genome.jp/dbget-bin/www_bget?ko:K05051	path:ko04080
c60417_g1_i1	K12460	KIDINS220, ARMS	http://www.genome.jp/dbget-bin/www_bget?ko:K12460	path:ko04722
c60639_g1_i1	K09228	KRAB	http://www.genome.jp/dbget-bin/www_bget?ko:K09228
c60510_g1_i1	K03234	EEF2	http://www.genome.jp/dbget-bin/www_bget?ko:K03234	path:ko04152;path:ko04921
c60601_g1_i1	K02993	RP-S7e, RPS7	http://www.genome.jp/dbget-bin/www_bget?ko:K02993	path:ko03010
c60710_g1_i1	K11141	ENPEP	http://www.genome.jp/dbget-bin/www_bget?ko:K11141	path:ko04614
c60207_g1_i1	K13411	DUOX, THOX	http://www.genome.jp/dbget-bin/www_bget?ko:K13411
c60570_g1_i1	K16799	CI	http://www.genome.jp/dbget-bin/www_bget?ko:K16799	path:ko04340
c60192_g1_i1	K06249	RELN	http://www.genome.jp/dbget-bin/www_bget?ko:K06249	path:ko04151;path:ko04510;path:ko04512
c60161_g1_i1	K09206	KLF5	http://www.genome.jp/dbget-bin/www_bget?ko:K09206
c60295_g1_i1	K17495	CSMD	http://www.genome.jp/dbget-bin/www_bget?ko:K17495
c60891_g1_i1	K03927	CES2	http://www.genome.jp/dbget-bin/www_bget?ko:K03927	path:ko00983
c60382_g1_i1	K01201	GBA, srfJ	http://www.genome.jp/dbget-bin/www_bget?ko:K01201	path:ko00511;path:ko00600;path:ko01100;path:ko04142
c60371_g1_i1	K10419	DYNLRB, DNCL2	http://www.genome.jp/dbget-bin/www_bget?ko:K10419
c60663_g1_i1	K00921	PIKFYVE, FAB1	http://www.genome.jp/dbget-bin/www_bget?ko:K00921	path:ko00562;path:ko04070;path:ko04145;path:ko04810
c60614_g1_i1	K00888	PI4K	http://www.genome.jp/dbget-bin/www_bget?ko:K00888	path:ko00562;path:ko01100;path:ko04070
c60438_g1_i1	K01539	ATP1A	http://www.genome.jp/dbget-bin/www_bget?ko:K01539	path:ko04022;path:ko04024;path:ko04260;path:ko04261;path:ko04911;path:ko04918;path:ko04919;path:ko04960;path:ko04961;path:ko04964;path:ko04970;path:ko04971;path:ko04972;path:ko04973;path:ko04974;path:ko04976;path:ko04978
c60261_g1_i1	K12404	GGA	http://www.genome.jp/dbget-bin/www_bget?ko:K12404	path:ko04142
c60307_g1_i1	K08483	PTS-EI.PTSI, ptsI	http://www.genome.jp/dbget-bin/www_bget?ko:K08483	path:ko02060
c60236_g1_i1	K11130	NOP10, NOLA3	http://www.genome.jp/dbget-bin/www_bget?ko:K11130	path:ko03008
c60367_g1_i1	K05694	PTPRB, PTPB	http://www.genome.jp/dbget-bin/www_bget?ko:K05694	path:ko04520
c60379_g1_i1	K13806	DAGL	http://www.genome.jp/dbget-bin/www_bget?ko:K13806	path:ko04723;path:ko04745
c60453_g1_i1	K11390	CLYBL	http://www.genome.jp/dbget-bin/www_bget?ko:K11390
c60227_g1_i1	K16743	ASPM, ASP	http://www.genome.jp/dbget-bin/www_bget?ko:K16743
c60347_g1_i1	K04984	TRPA1, ANKTM1	http://www.genome.jp/dbget-bin/www_bget?ko:K04984	path:ko04750
c60394_g1_i1	K02875	RP-L14e, RPL14	http://www.genome.jp/dbget-bin/www_bget?ko:K02875	path:ko03010
c60165_g1_i1	K10605	BRCA1	http://www.genome.jp/dbget-bin/www_bget?ko:K10605	path:ko03460;path:ko04120;path:ko04151;path:ko05206
c61016_g1_i1	K16747	BBS2	http://www.genome.jp/dbget-bin/www_bget?ko:K16747
c60127_g1_i1	K02912	RP-L32e, RPL32	http://www.genome.jp/dbget-bin/www_bget?ko:K02912	path:ko03010
c60327_g1_i1	K03909	TFPI	http://www.genome.jp/dbget-bin/www_bget?ko:K03909	path:ko04610
c60283_g1_i1	K09098	NPAS1_3	http://www.genome.jp/dbget-bin/www_bget?ko:K09098
c60356_g1_i1	K08829	MAK	http://www.genome.jp/dbget-bin/www_bget?ko:K08829
c60134_g1_i1	K09213	HB	http://www.genome.jp/dbget-bin/www_bget?ko:K09213
c60144_g1_i1	K11140	ANPEP	http://www.genome.jp/dbget-bin/www_bget?ko:K11140	path:ko00480;path:ko01100;path:ko04614;path:ko04640
c60141_g1_i1	K14683	SLC34A, NPT, nptA	http://www.genome.jp/dbget-bin/www_bget?ko:K14683
c60716_g1_i1	K03006	RPB1, POLR2A	http://www.genome.jp/dbget-bin/www_bget?ko:K03006	path:ko00230;path:ko00240;path:ko01100;path:ko03020;path:ko05016;path:ko05168;path:ko05169
c60837_g1_i1	K09228	KRAB	http://www.genome.jp/dbget-bin/www_bget?ko:K09228
c60566_g1_i1	K10352	MYH	http://www.genome.jp/dbget-bin/www_bget?ko:K10352	path:ko04530
c60529_g1_i1	K00888	PI4K	http://www.genome.jp/dbget-bin/www_bget?ko:K00888	path:ko00562;path:ko01100;path:ko04070
c60332_g1_i1	K09228	KRAB	http://www.genome.jp/dbget-bin/www_bget?ko:K09228
c60237_g1_i1	K01674	cah	http://www.genome.jp/dbget-bin/www_bget?ko:K01674	path:ko00910
c60343_g1_i1	K16749	BBS7	http://www.genome.jp/dbget-bin/www_bget?ko:K16749
c60583_g1_i1	K04550	LRP1, CD91	http://www.genome.jp/dbget-bin/www_bget?ko:K04550	path:ko05010;path:ko05144
c60406_g1_i1	K07750	E1.14.13.72, SC4MOL, ERG25	http://www.genome.jp/dbget-bin/www_bget?ko:K07750	path:ko00100;path:ko01100
c60263_g1_i1	K03649	MUG, TDG	http://www.genome.jp/dbget-bin/www_bget?ko:K03649	path:ko03410
c60564_g1_i1	K10361	MYO15	http://www.genome.jp/dbget-bin/www_bget?ko:K10361
c60142_g1_i1	K11840	USP9_24	http://www.genome.jp/dbget-bin/www_bget?ko:K11840
c60571_g1_i1	K13096	SF4	http://www.genome.jp/dbget-bin/www_bget?ko:K13096
c60180_g1_i1	K02728	PSMA4	http://www.genome.jp/dbget-bin/www_bget?ko:K02728	path:ko03050
c60290_g1_i1	K18048	ninaB	http://www.genome.jp/dbget-bin/www_bget?ko:K18048
c59197_g1_i1	K05011	CLCN2	http://www.genome.jp/dbget-bin/www_bget?ko:K05011	path:ko04978
c59186_g1_i1	K15271	HFM1, MER3	http://www.genome.jp/dbget-bin/www_bget?ko:K15271
c59870_g1_i1	K10352	MYH	http://www.genome.jp/dbget-bin/www_bget?ko:K10352	path:ko04530
c59383_g1_i1	K01415	E3.4.24.71, ECE1, ECE2	http://www.genome.jp/dbget-bin/www_bget?ko:K01415
c59313_g1_i1	K10417	DYNC2LI	http://www.genome.jp/dbget-bin/www_bget?ko:K10417	path:ko04962
c59089_g1_i1	K14640	SLC20A, PIT	http://www.genome.jp/dbget-bin/www_bget?ko:K14640
c59195_g1_i1	K01624	FBA, fbaA	http://www.genome.jp/dbget-bin/www_bget?ko:K01624	path:ko00010;path:ko00030;path:ko00051;path:ko00680;path:ko00710;path:ko01100;path:ko01110;path:ko01120;path:ko01200;path:ko01230
c59908_g1_i1	K10521	ABTB2	http://www.genome.jp/dbget-bin/www_bget?ko:K10521
c59529_g1_i1	K12879	THOC2	http://www.genome.jp/dbget-bin/www_bget?ko:K12879	path:ko03013;path:ko03040
c60039_g1_i1	K03046	rpoC	http://www.genome.jp/dbget-bin/www_bget?ko:K03046	path:ko00230;path:ko00240;path:ko01100;path:ko03020
c59912_g1_i1	K17551	PPP1R9	http://www.genome.jp/dbget-bin/www_bget?ko:K17551
c59514_g1_i1	K07232	chaC	http://www.genome.jp/dbget-bin/www_bget?ko:K07232
c59293_g1_i1	K01596	E4.1.1.32, pckA, PEPCK	http://www.genome.jp/dbget-bin/www_bget?ko:K01596	path:ko00010;path:ko00020;path:ko00620;path:ko01100;path:ko01110;path:ko01120;path:ko03320;path:ko04068;path:ko04151;path:ko04152;path:ko04910;path:ko04920;path:ko04964
c59179_g1_i1	K07817	PTPRN	http://www.genome.jp/dbget-bin/www_bget?ko:K07817	path:ko04940
c59258_g1_i1	K12380	RASA3	http://www.genome.jp/dbget-bin/www_bget?ko:K12380	path:ko04013;path:ko04014
c59259_g1_i1	K13862	SLC4A11, BTR1	http://www.genome.jp/dbget-bin/www_bget?ko:K13862
c59143_g1_i1	K15613	MEIS1	http://www.genome.jp/dbget-bin/www_bget?ko:K15613	path:ko05202
c59605_g1_i1	K14411	MSI	http://www.genome.jp/dbget-bin/www_bget?ko:K14411	path:ko03015
c59966_g1_i1	K09203	EGR1	http://www.genome.jp/dbget-bin/www_bget?ko:K09203	path:ko05020;path:ko05166
c59398_g1_i1	K02327	POLD1	http://www.genome.jp/dbget-bin/www_bget?ko:K02327	path:ko00230;path:ko00240;path:ko01100;path:ko03030;path:ko03410;path:ko03420;path:ko03430;path:ko03440;path:ko05166
c59270_g1_i1	K09103	EBF, COE	http://www.genome.jp/dbget-bin/www_bget?ko:K09103
c60027_g1_i1	K08202	SLC22A4_5, OCTN	http://www.genome.jp/dbget-bin/www_bget?ko:K08202
c59680_g1_i1	K00106	XDH	http://www.genome.jp/dbget-bin/www_bget?ko:K00106	path:ko00230;path:ko00232;path:ko00983;path:ko01100;path:ko01110;path:ko01120;path:ko04146
c60072_g1_i1	K10423	CLIP3_4	http://www.genome.jp/dbget-bin/www_bget?ko:K10423
c59463_g1_i1	K16717	CEP97	http://www.genome.jp/dbget-bin/www_bget?ko:K16717
c59384_g1_i1	K14327	UPF2, RENT2	http://www.genome.jp/dbget-bin/www_bget?ko:K14327	path:ko03013;path:ko03015
c59387_g1_i1	K05858	PLCB	http://www.genome.jp/dbget-bin/www_bget?ko:K05858	path:ko00562;path:ko01100;path:ko04015;path:ko04020;path:ko04022;path:ko04062;path:ko04070;path:ko04261;path:ko04270;path:ko04310;path:ko04540;path:ko04611;path:ko04713;path:ko04720;path:ko04723;path:ko04724;path:ko04725;path:ko04726;path:ko04728;path:ko04730;path:ko04745;path:ko04750;path:ko04911;path:ko04912;path:ko04915;path:ko04916;path:ko04918;path:ko04919;path:ko04921;path:ko04961;path:ko04…
c59394_g1_i1	K14383	SLC5A3, SMIT	http://www.genome.jp/dbget-bin/www_bget?ko:K14383
c59573_g1_i1	K08869	ADCK, ABC1	http://www.genome.jp/dbget-bin/www_bget?ko:K08869
c59172_g1_i1	K01205	NAGLU	http://www.genome.jp/dbget-bin/www_bget?ko:K01205	path:ko00531;path:ko01100;path:ko04142
c59952_g1_i1	K05692	ACTB_G1	http://www.genome.jp/dbget-bin/www_bget?ko:K05692	path:ko04015;path:ko04145;path:ko04390;path:ko04391;path:ko04510;path:ko04520;path:ko04530;path:ko04611;path:ko04670;path:ko04745;path:ko04810;path:ko04919;path:ko04921;path:ko05100;path:ko05110;path:ko05130;path:ko05131;path:ko05132;path:ko05164;path:ko05205;path:ko05410;path:ko05412;path:ko05414;path:ko05416
c59640_g1_i1	K02950	RP-S12, MRPS12, rpsL	http://www.genome.jp/dbget-bin/www_bget?ko:K02950	path:ko03010
c59853_g1_i1	K00515	BCMO1, BCDO1	http://www.genome.jp/dbget-bin/www_bget?ko:K00515	path:ko00830;path:ko01100
c59913_g1_i1	K10118	msmF	http://www.genome.jp/dbget-bin/www_bget?ko:K10118	path:ko02010
c59666_g1_i1	K06187	recR	http://www.genome.jp/dbget-bin/www_bget?ko:K06187	path:ko03440
c59148_g1_i1	K08739	MLH3	http://www.genome.jp/dbget-bin/www_bget?ko:K08739	path:ko03430
c59366_g1_i1	K00008	SORD, gutB	http://www.genome.jp/dbget-bin/www_bget?ko:K00008	path:ko00040;path:ko00051;path:ko01100
c59826_g1_i1	K02035	ABC.PE.S	http://www.genome.jp/dbget-bin/www_bget?ko:K02035
c59513_g1_i1	K17854	CYP2K	http://www.genome.jp/dbget-bin/www_bget?ko:K17854
c60097_g1_i1	K06767	DSCAM	http://www.genome.jp/dbget-bin/www_bget?ko:K06767
c59956_g1_i1	K16617	COL13A	http://www.genome.jp/dbget-bin/www_bget?ko:K16617	path:ko04974
c59340_g1_i1	K08239	GNPTAB	http://www.genome.jp/dbget-bin/www_bget?ko:K08239	path:ko04142
c59437_g1_i1	K06234	RAB23	http://www.genome.jp/dbget-bin/www_bget?ko:K06234	path:ko04340
c59733_g1_i1	K02355	fusA, GFM, EFG	http://www.genome.jp/dbget-bin/www_bget?ko:K02355
c65082_g1_i1	K00002	AKR1A1, adh	http://www.genome.jp/dbget-bin/www_bget?ko:K00002	path:ko00010;path:ko00040;path:ko00561;path:ko00930;path:ko01100;path:ko01110;path:ko01120;path:ko01220
c64291_g1_i1	K08654	PCSK5	http://www.genome.jp/dbget-bin/www_bget?ko:K08654
c64297_g1_i1	K08782	CPA6	http://www.genome.jp/dbget-bin/www_bget?ko:K08782
c64329_g1_i1	K04962	RYR2	http://www.genome.jp/dbget-bin/www_bget?ko:K04962	path:ko04020;path:ko04024;path:ko04260;path:ko04261;path:ko04713;path:ko04911;path:ko04921;path:ko04972;path:ko05410;path:ko05412;path:ko05414
c64509_g1_i1	K00933	E2.7.3.2	http://www.genome.jp/dbget-bin/www_bget?ko:K00933	path:ko00330;path:ko01100
c64875_g1_i1	K10395	KIF4S	http://www.genome.jp/dbget-bin/www_bget?ko:K10395
c64437_g1_i1	K09228	KRAB	http://www.genome.jp/dbget-bin/www_bget?ko:K09228
c65051_g1_i1	K10361	MYO15	http://www.genome.jp/dbget-bin/www_bget?ko:K10361
c64920_g1_i1	K00659	BAAT	http://www.genome.jp/dbget-bin/www_bget?ko:K00659	path:ko00120;path:ko00430;path:ko01040;path:ko01100;path:ko04146;path:ko04976
c64442_g1_i1	K10040	ABC.GLN1.P	http://www.genome.jp/dbget-bin/www_bget?ko:K10040	path:ko02010
c64757_g1_i1	K01201	GBA, srfJ	http://www.genome.jp/dbget-bin/www_bget?ko:K01201	path:ko00511;path:ko00600;path:ko01100;path:ko04142
c64624_g1_i1	K00726	MGAT1	http://www.genome.jp/dbget-bin/www_bget?ko:K00726	path:ko00510;path:ko00513;path:ko01100
c64455_g1_i1	K09364	POU2F, OTF	http://www.genome.jp/dbget-bin/www_bget?ko:K09364
c64907_g1_i1	K03462	NAMPT	http://www.genome.jp/dbget-bin/www_bget?ko:K03462	path:ko00760;path:ko01100
c64955_g1_i1	K10394	KIF3_17	http://www.genome.jp/dbget-bin/www_bget?ko:K10394
c64810_g1_i1	K09228	KRAB	http://www.genome.jp/dbget-bin/www_bget?ko:K09228
c65067_g1_i1	K14820	BRX1, BRIX1	http://www.genome.jp/dbget-bin/www_bget?ko:K14820
c64930_g1_i1	K17572	ARFGEF3, KEPI	http://www.genome.jp/dbget-bin/www_bget?ko:K17572
c64575_g1_i1	K09228	KRAB	http://www.genome.jp/dbget-bin/www_bget?ko:K09228
c64664_g1_i1	K04988	PKD1L2	http://www.genome.jp/dbget-bin/www_bget?ko:K04988
c64158_g1_i1	K05706	SNAI2, SLUG	http://www.genome.jp/dbget-bin/www_bget?ko:K05706	path:ko04390;path:ko04520
c65072_g1_i1	K09609	ADAMTS20	http://www.genome.jp/dbget-bin/www_bget?ko:K09609
c65066_g1_i1	K01176	E3.2.1.1, amyA, malS	http://www.genome.jp/dbget-bin/www_bget?ko:K01176	path:ko00500;path:ko01100;path:ko04973
c65009_g1_i1	K13963	SERPINB	http://www.genome.jp/dbget-bin/www_bget?ko:K13963	path:ko05146
c64468_g1_i1	K08810	TRIO	http://www.genome.jp/dbget-bin/www_bget?ko:K08810
c64383_g1_i1	K06237	COL4A	http://www.genome.jp/dbget-bin/www_bget?ko:K06237	path:ko04151;path:ko04510;path:ko04512;path:ko04974;path:ko05146;path:ko05200;path:ko05222
c65092_g1_i1	K00471	E1.14.11.1	http://www.genome.jp/dbget-bin/www_bget?ko:K00471	path:ko00310
c64274_g1_i1	K08664	PRSS8	http://www.genome.jp/dbget-bin/www_bget?ko:K08664
[truncated: 8,104 more rows]
