# Supplementary material for: Insights into Sexual Precocity of Female Oriental River Prawn Macrobrachium nipponense through Transcriptome Analysis
Source: PLoS One. 2016 Jun 9;11(6):e0157173. doi: 10.1371/journal.pone.0157173 (PMC4900531; doi:10.1371/journal.pone.0157173)
Supplement: S6 Table — (XLSX) [file pone.0157173.s006.xlsx]

## Sheet: (Additional file 5)SSR.stat
Type	utr5(>15bp)	utr3(>15bp)	coding(>15bp)	undetermined(>15bp)	total(> 15bp)
Mononucleotide	0(0)	0(0)	0(0)	11697(2621)	11697(2621)
A/T	0(0)	0(0)	0(0)	11504(2601)	11504(2601)
C/G	0(0)	0(0)	0(0)	193(20)	193(20)
Dinucleotide	0(0)	0(0)	0(0)	5511(3022)	5511(3022)
AC/GT	0(0)	0(0)	0(0)	1134(531)	1134(531)
AG/CT	0(0)	0(0)	0(0)	3127(2163)	3127(2163)
AT/AT	0(0)	0(0)	0(0)	1240(325)	1240(325)
CG/CG	0(0)	0(0)	0(0)	10(3)	10(3)
Trinucleotide	0(0)	0(0)	0(0)	8238(1704)	8238(1704)
AAC/GTT	0(0)	0(0)	0(0)	595(116)	595(116)
AAG/CTT	0(0)	0(0)	0(0)	1144(236)	1144(236)
AAT/ATT	0(0)	0(0)	0(0)	1251(308)	1251(308)
ACC/GGT	0(0)	0(0)	0(0)	690(84)	690(84)
ACG/CGT	0(0)	0(0)	0(0)	154(24)	154(24)
ACT/AGT	0(0)	0(0)	0(0)	624(126)	624(126)
AGC/GCT	0(0)	0(0)	0(0)	1198(291)	1198(291)
AGG/CCT	0(0)	0(0)	0(0)	1292(273)	1292(273)
ATC/GAT	0(0)	0(0)	0(0)	1187(231)	1187(231)
CCG/CGG	0(0)	0(0)	0(0)	103(15)	103(15)
Tetranucleotide	0(0)	0(0)	0(0)	495(495)	495(495)
AAAC/GTTT	0(0)	0(0)	0(0)	48(48)	48(48)
AAAG/CTTT	0(0)	0(0)	0(0)	27(27)	27(27)
AAAT/ATTT	0(0)	0(0)	0(0)	131(131)	131(131)
AACC/GGTT	0(0)	0(0)	0(0)	9(9)	9(9)
AACG/CGTT	0(0)	0(0)	0(0)	4(4)	4(4)
AACT/AGTT	0(0)	0(0)	0(0)	1(1)	1(1)
AAGC/GCTT	0(0)	0(0)	0(0)	14(14)	14(14)
AAGG/CCTT	0(0)	0(0)	0(0)	30(30)	30(30)
AAGT/ACTT	0(0)	0(0)	0(0)	2(2)	2(2)
AATC/GATT	0(0)	0(0)	0(0)	11(11)	11(11)
AATG/CATT	0(0)	0(0)	0(0)	14(14)	14(14)
AATT/AATT	0(0)	0(0)	0(0)	1(1)	1(1)
ACAG/CTGT	0(0)	0(0)	0(0)	74(74)	74(74)
ACAT/ATGT	0(0)	0(0)	0(0)	56(56)	56(56)
ACCC/GGGT	0(0)	0(0)	0(0)	1(1)	1(1)
ACCG/CGGT	0(0)	0(0)	0(0)	2(2)	2(2)
ACCT/AGGT	0(0)	0(0)	0(0)	7(7)	7(7)
ACGC/GCGT	0(0)	0(0)	0(0)	1(1)	1(1)
ACGG/CCGT	0(0)	0(0)	0(0)	5(5)	5(5)
ACGT/ACGT	0(0)	0(0)	0(0)	1(1)	1(1)
ACTC/GAGT	0(0)	0(0)	0(0)	5(5)	5(5)
ACTG/CAGT	0(0)	0(0)	0(0)	16(16)	16(16)
AGAT/ATCT	0(0)	0(0)	0(0)	11(11)	11(11)
AGCC/GGCT	0(0)	0(0)	0(0)	5(5)	5(5)
AGCG/CGCT	0(0)	0(0)	0(0)	2(2)	2(2)
AGGC/GCCT	0(0)	0(0)	0(0)	2(2)	2(2)
AGGG/CCCT	0(0)	0(0)	0(0)	3(3)	3(3)
ATCC/GGAT	0(0)	0(0)	0(0)	9(9)	9(9)
ATCG/CGAT	0(0)	0(0)	0(0)	2(2)	2(2)
ATGC/GCAT	0(0)	0(0)	0(0)	1(1)	1(1)
Pentanucleotide	0(0)	0(0)	0(0)	48(48)	48(48)
AAAAC/GTTTT	0(0)	0(0)	0(0)	1(1)	1(1)
AAAAG/CTTTT	0(0)	0(0)	0(0)	2(2)	2(2)
AAAAT/ATTTT	0(0)	0(0)	0(0)	10(10)	10(10)
AAAGG/CCTTT	0(0)	0(0)	0(0)	1(1)	1(1)
AACCT/AGGTT	0(0)	0(0)	0(0)	3(3)	3(3)
AAGAC/GTCTT	0(0)	0(0)	0(0)	1(1)	1(1)
AAGAG/CTCTT	0(0)	0(0)	0(0)	1(1)	1(1)
AAGCC/GGCTT	0(0)	0(0)	0(0)	1(1)	1(1)
AAGGC/GCCTT	0(0)	0(0)	0(0)	4(4)	4(4)
AATAG/CTATT	0(0)	0(0)	0(0)	1(1)	1(1)
AATAT/ATATT	0(0)	0(0)	0(0)	1(1)	1(1)
AATCT/AGATT	0(0)	0(0)	0(0)	2(2)	2(2)
AATGC/GCATT	0(0)	0(0)	0(0)	4(4)	4(4)
AATTC/GAATT	0(0)	0(0)	0(0)	2(2)	2(2)
ACACT/AGTGT	0(0)	0(0)	0(0)	1(1)	1(1)
ACATC/GATGT	0(0)	0(0)	0(0)	1(1)	1(1)
ACCGG/CCGGT	0(0)	0(0)	0(0)	1(1)	1(1)
ACCTG/CAGGT	0(0)	0(0)	0(0)	1(1)	1(1)
ACGGG/CCCGT	0(0)	0(0)	0(0)	1(1)	1(1)
AGAGC/GCTCT	0(0)	0(0)	0(0)	7(7)	7(7)
AGGGG/CCCCT	0(0)	0(0)	0(0)	2(2)	2(2)
Hexanucleotide	0(0)	0(0)	0(0)	37(37)	37(37)
AAAAAG/CTTTTT	0(0)	0(0)	0(0)	1(1)	1(1)
AAAAGT/ACTTTT	0(0)	0(0)	0(0)	1(1)	1(1)
AAAGAG/CTCTTT	0(0)	0(0)	0(0)	1(1)	1(1)
AAAGGC/GCCTTT	0(0)	0(0)	0(0)	3(3)	3(3)
AACAAG/CTTGTT	0(0)	0(0)	0(0)	1(1)	1(1)
AACAAT/ATTGTT	0(0)	0(0)	0(0)	1(1)	1(1)
AACCTC/GAGGTT	0(0)	0(0)	0(0)	1(1)	1(1)
AACTGG/CCAGTT	0(0)	0(0)	0(0)	2(2)	2(2)
AAGAGG/CCTCTT	0(0)	0(0)	0(0)	1(1)	1(1)
AAGGAC/GTCCTT	0(0)	0(0)	0(0)	2(2)	2(2)
AAGGAG/CTCCTT	0(0)	0(0)	0(0)	3(3)	3(3)
AAGGGG/CCCCTT	0(0)	0(0)	0(0)	1(1)	1(1)
AATGAG/CTCATT	0(0)	0(0)	0(0)	1(1)	1(1)
ACAGAG/CTCTGT	0(0)	0(0)	0(0)	1(1)	1(1)
ACATCT/AGATGT	0(0)	0(0)	0(0)	1(1)	1(1)
ACCAGG/CCTGGT	0(0)	0(0)	0(0)	2(2)	2(2)
ACCTCC/GGAGGT	0(0)	0(0)	0(0)	1(1)	1(1)
ACCTGC/GCAGGT	0(0)	0(0)	0(0)	1(1)	1(1)
ACTGCT/AGCAGT	0(0)	0(0)	0(0)	2(2)	2(2)
AGAGAT/ATCTCT	0(0)	0(0)	0(0)	4(4)	4(4)
AGGATG/CATCCT	0(0)	0(0)	0(0)	2(2)	2(2)
AGGGAT/ATCCCT	0(0)	0(0)	0(0)	4(4)	4(4)
total	0(0)	0(0)	0(0)	26008(7927)	26008(7927)
